# Supplementary material for: Regioselective solid-phase synthesis of N-mono-hydroxylated and N-mono-methylated acylpolyamine spider toxins using an 2-(ortho-nitrophenyl)ethanal-modified resin
Source: Royal Society of Chemistry journal article supplement (doi:10.1039/c5ob00108k), 2015-01-01

## Regioselective solid-phase synthesis of *N*-mono-hydroxylated and *N*-mono-methylated acylpolyamine spider toxins using an 2-(*ortho*-nitrophenyl)ethanal-modified resin

Denise Pauli and Stefan Bienz\*  
Department of Chemistry  
University of Zurich  
Winterthurerstrasse 190  
CH-8057 Zürich

phone: +41 44 635 42 45  
fax: +41 44 635 68 12  
stefan.bienz@chem.uzh.ch

### Supplementary material

Spectra of the final products

#### **AG395a** (*4-OH-Bz3(OH)334*):

|                                                                |      |
|----------------------------------------------------------------|------|
| <sup>1</sup> H NMR (400 MHz) and <sup>13</sup> C NMR (100 MHz) | p. 3 |
| COSY                                                           | p. 4 |
| HSQC                                                           | p. 5 |
| HMBC                                                           | p. 6 |

#### **AG432g** (*IndAc3(OH)334*):

|                                                                |       |
|----------------------------------------------------------------|-------|
| <sup>1</sup> H NMR (600 MHz) and <sup>13</sup> C NMR (150 MHz) | p. 7  |
| COSY                                                           | p. 8  |
| HSQC                                                           | p. 9  |
| HMBC                                                           | p. 10 |

#### *4-OH-Bz3(OH)433*:

|                                                                |       |
|----------------------------------------------------------------|-------|
| <sup>1</sup> H NMR (400 MHz) and <sup>13</sup> C NMR (100 MHz) | p. 11 |
| COSY                                                           | p. 12 |
| HSQC                                                           | p. 13 |
| HMBC                                                           | p. 14 |

#### **LF448A** (*PhAcAsn3(Me)43*):

|                                                                |       |
|----------------------------------------------------------------|-------|
| <sup>1</sup> H NMR (500 MHz) and <sup>13</sup> C NMR (125 MHz) | p. 15 |
| COSY                                                           | p. 16 |
| HSQC                                                           | p. 17 |
| HMBC                                                           | p. 18 |

#### **LF487A** (*IndAcAsn3(Me)43*):

|                                                                |       |
|----------------------------------------------------------------|-------|
| <sup>1</sup> H NMR (500 MHz) and <sup>13</sup> C NMR (125 MHz) | p. 19 |
| COSY                                                           | p. 20 |
| HSQC                                                           | p. 21 |
| HMBC                                                           | p. 22 |

Spectra of the precursors of the final products

#### Compound **29**

|                               |       |
|-------------------------------|-------|
| <sup>1</sup> H NMR (400 MHz)  | p. 23 |
| <sup>13</sup> C NMR (100 MHz) | p. 24 |
| COSY                          | p. 55 |
| HSQC                          | p. 26 |

|                                                                                                                         |       |
|-------------------------------------------------------------------------------------------------------------------------|-------|
| Compound <b>30</b>                                                                                                      |       |
| <sup>1</sup> H NMR (400 MHz)                                                                                            | p. 27 |
| <sup>13</sup> C NMR (100 MHz)                                                                                           | p. 28 |
| COSY                                                                                                                    | p. 29 |
| HSQC                                                                                                                    | p. 30 |
| Compound <b>31</b>                                                                                                      |       |
| <sup>1</sup> H NMR (400 MHz)                                                                                            | p. 31 |
| <sup>13</sup> C NMR (100 MHz)                                                                                           | p. 32 |
| COSY                                                                                                                    | p. 33 |
| HSQC                                                                                                                    | p. 34 |
| Compound <b>40</b>                                                                                                      |       |
| <sup>1</sup> H NMR (500 MHz)                                                                                            | p. 35 |
| <sup>13</sup> C NMR (125 MHz)                                                                                           | p. 36 |
| COSY                                                                                                                    | p. 37 |
| HSQC                                                                                                                    | p. 38 |
| HMBC                                                                                                                    | p. 39 |
| Compound <b>41</b>                                                                                                      |       |
| <sup>1</sup> H NMR (500 MHz)                                                                                            | p. 40 |
| <sup>13</sup> C NMR (125 MHz)                                                                                           | p. 41 |
| COSY                                                                                                                    | p. 42 |
| HSQC                                                                                                                    | p. 43 |
| HMBC                                                                                                                    | p. 44 |
| Chromatographic and comparisons of the natural and synthetic toxins <b>LF448A</b> and <b>LF487A</b> of <i>L. folium</i> |       |
| Chromatograms                                                                                                           | p. 45 |
| ESI-MS/MS                                                                                                               | p. 46 |

Compound **AG395a**:

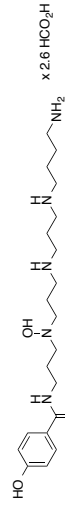

$^1\text{H} - 400 \text{ MHz}$

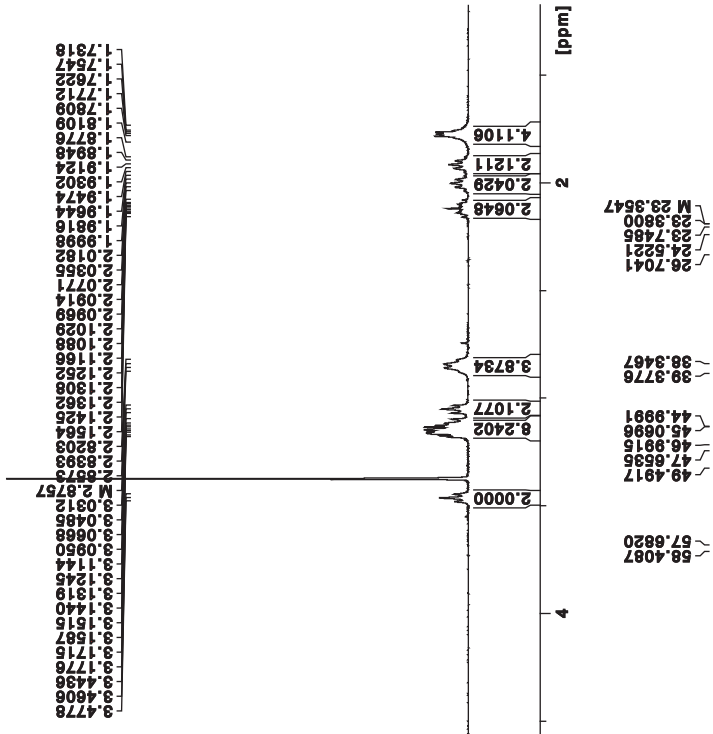

$^{13}\text{C} - 100 \text{ MHz}$

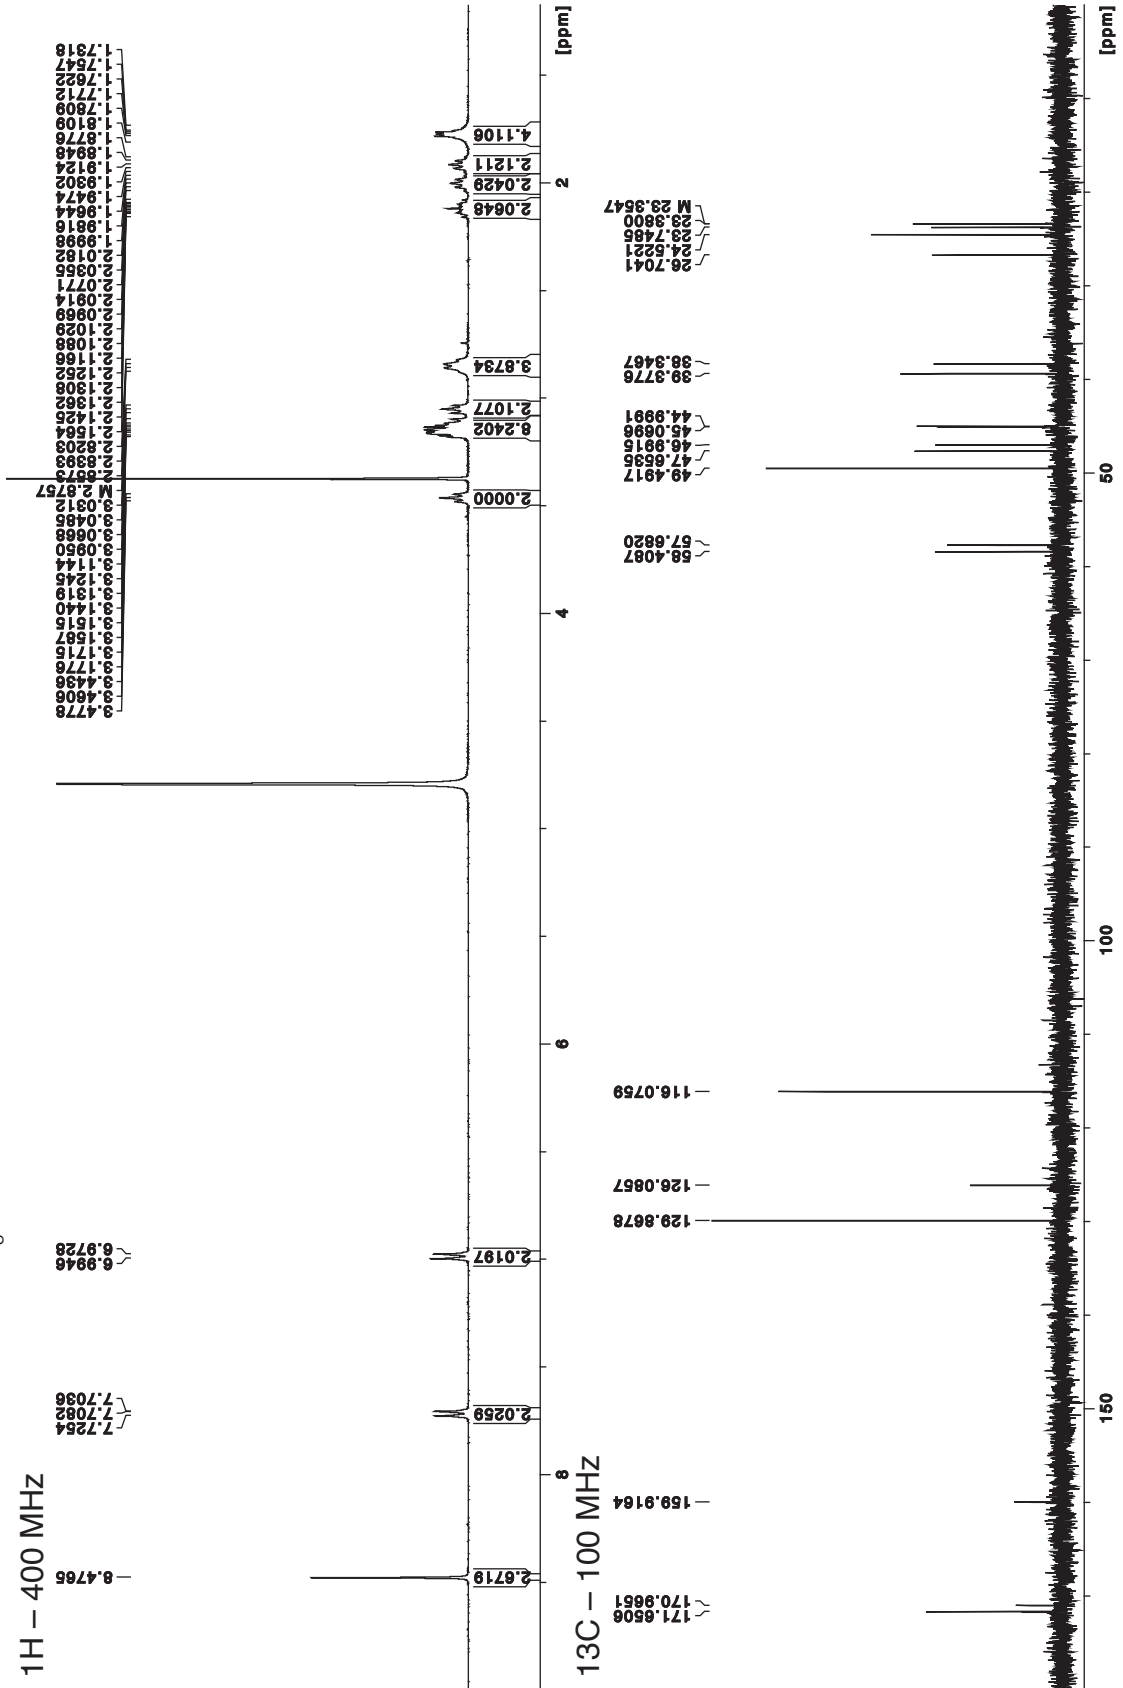

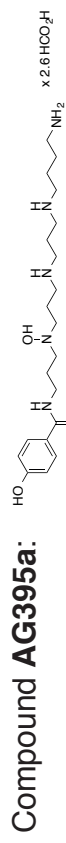

COSY:

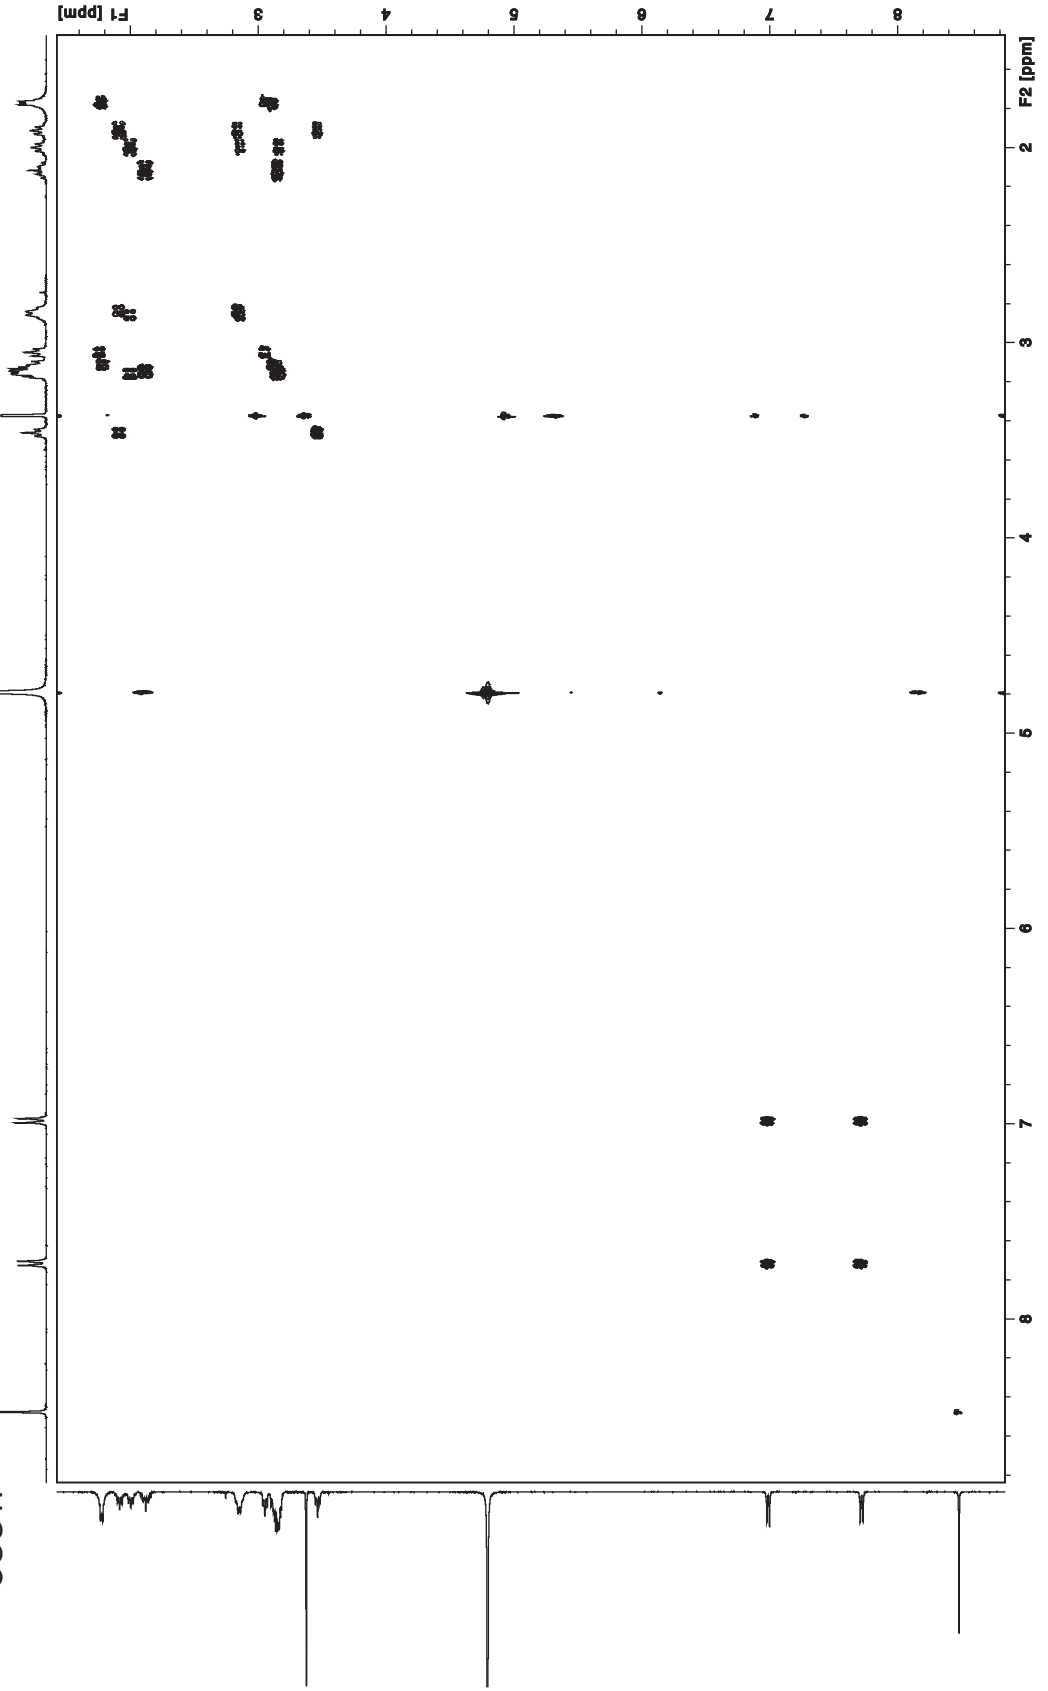

Compound **AG395a**:

HSQC:

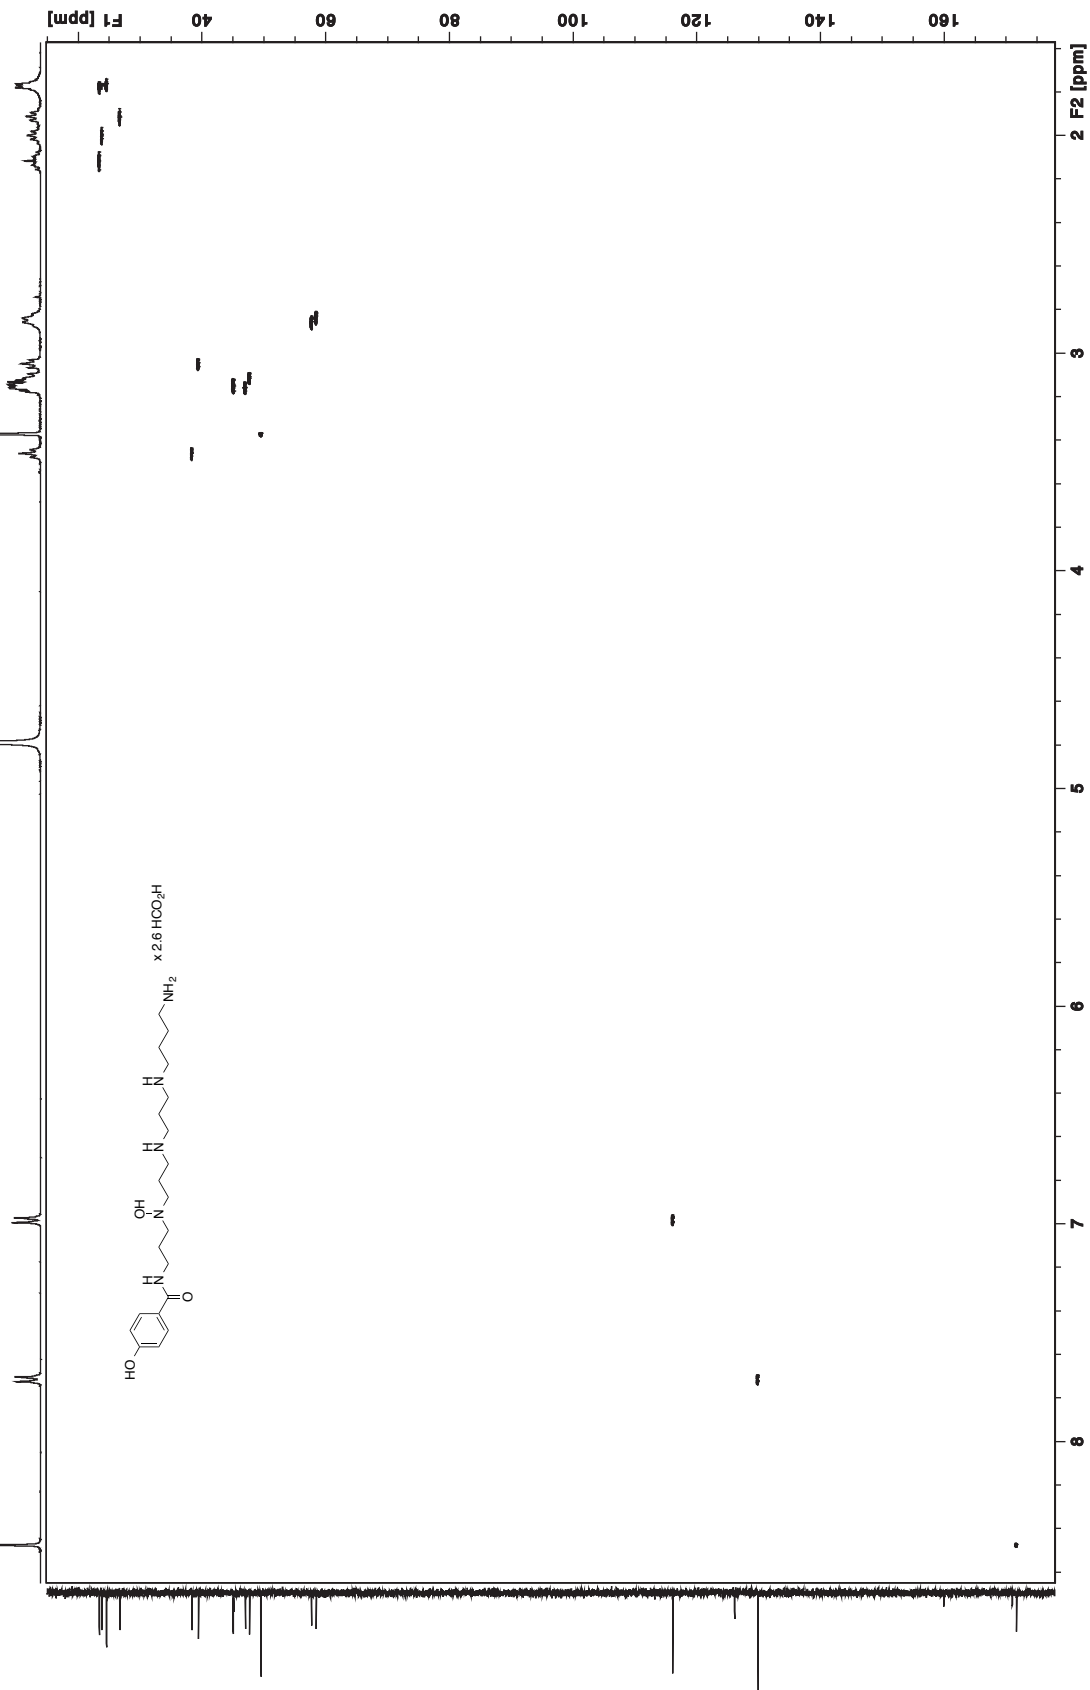

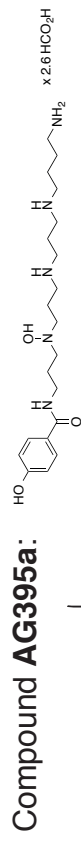

HMBC:

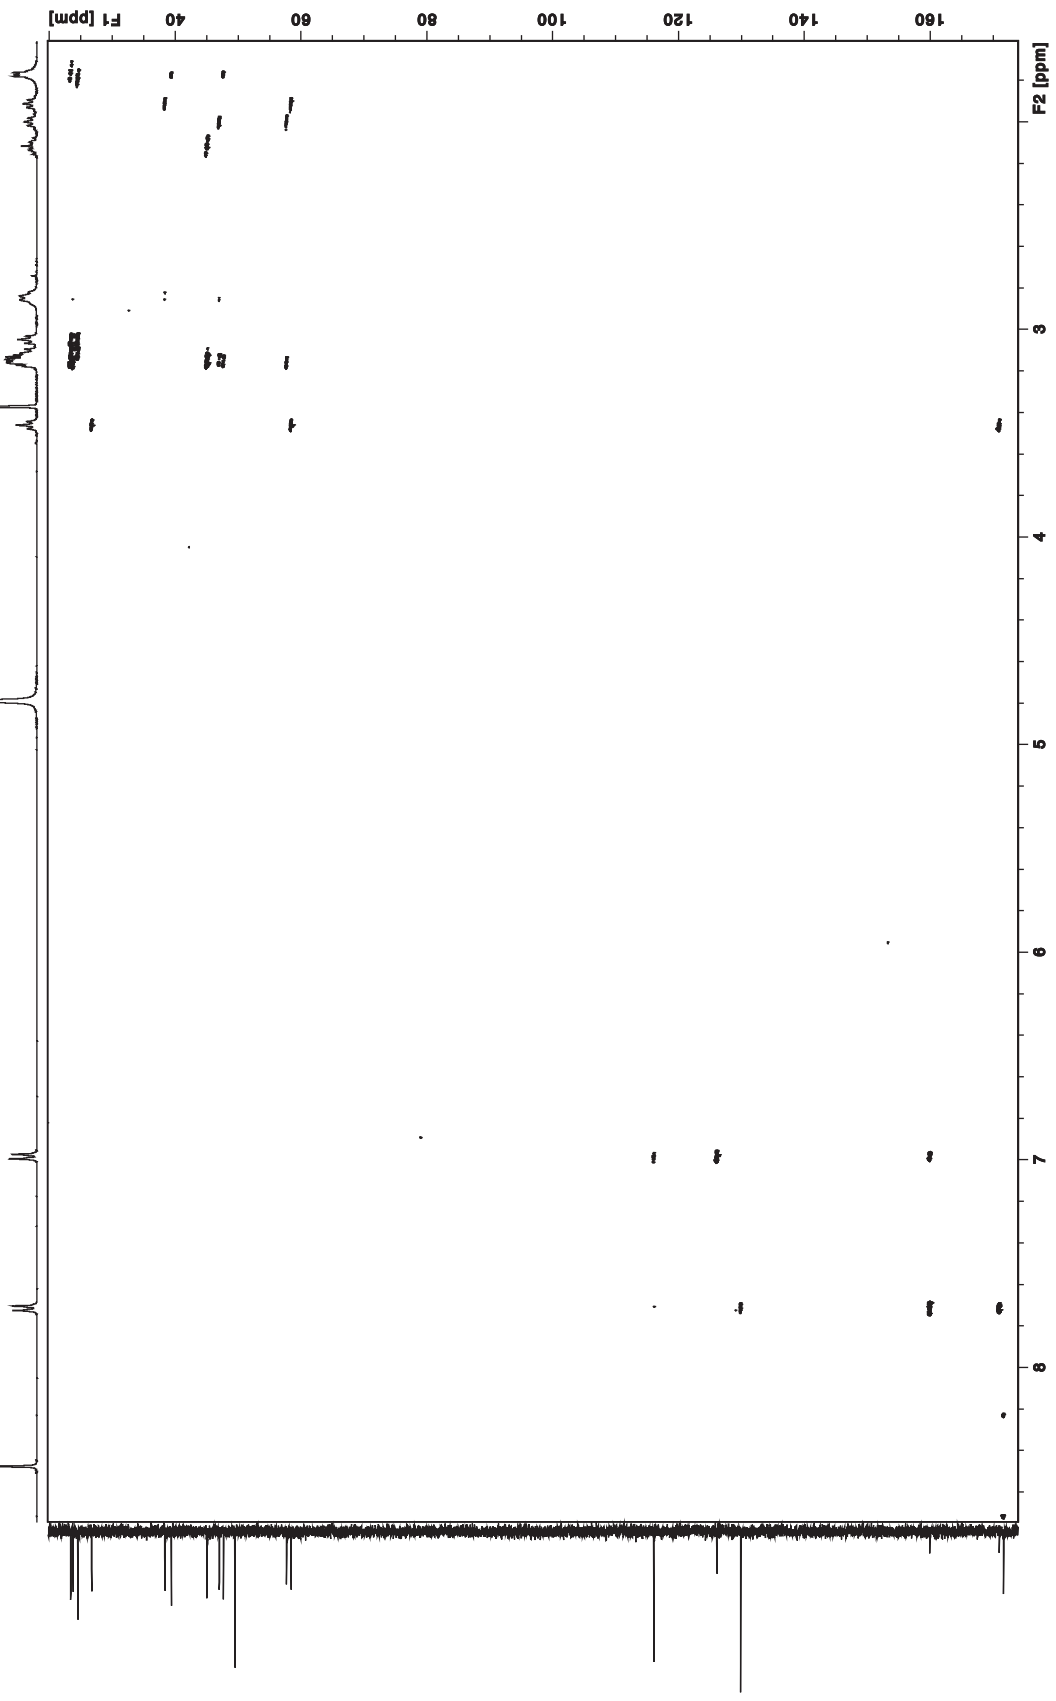

Compound AG432g

1H - 600 MHz

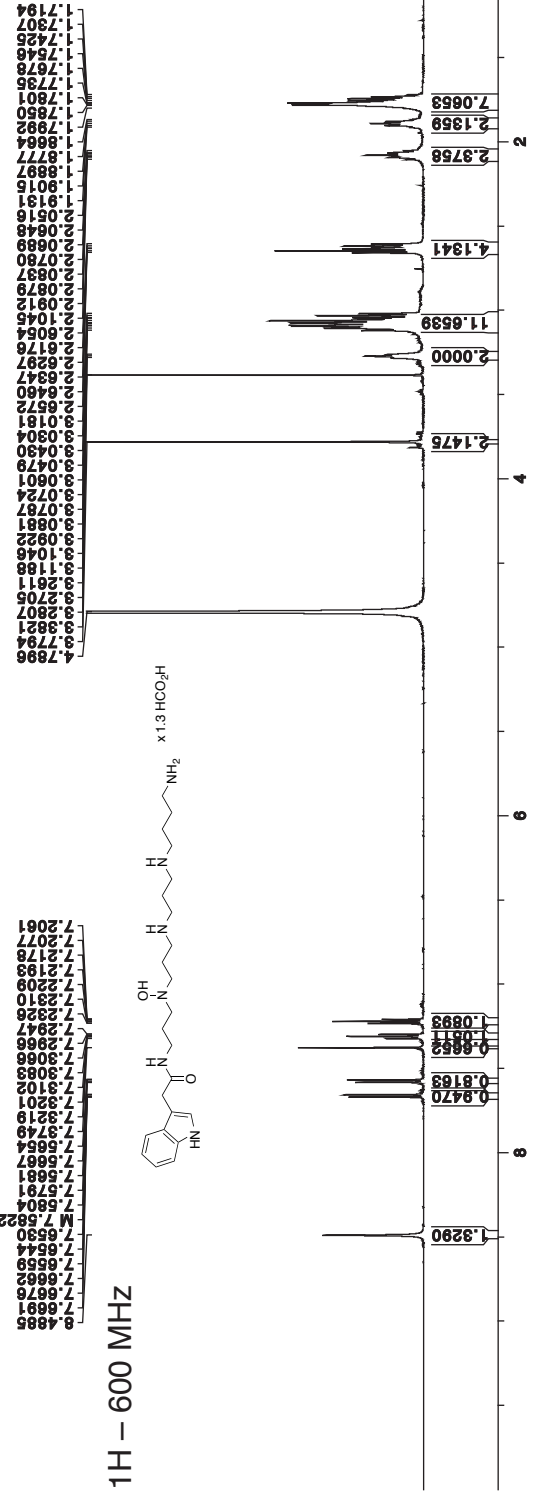

13C - 150 MHz

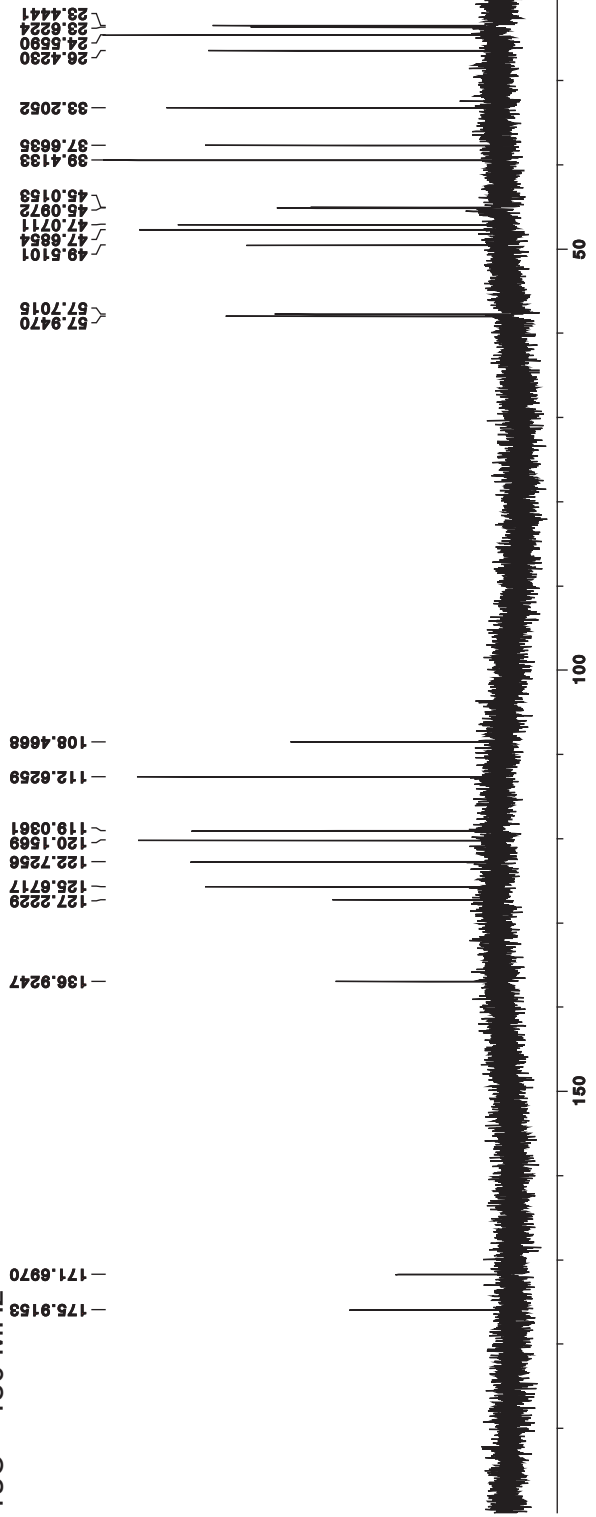

Compound **AG432g**:

COSY:

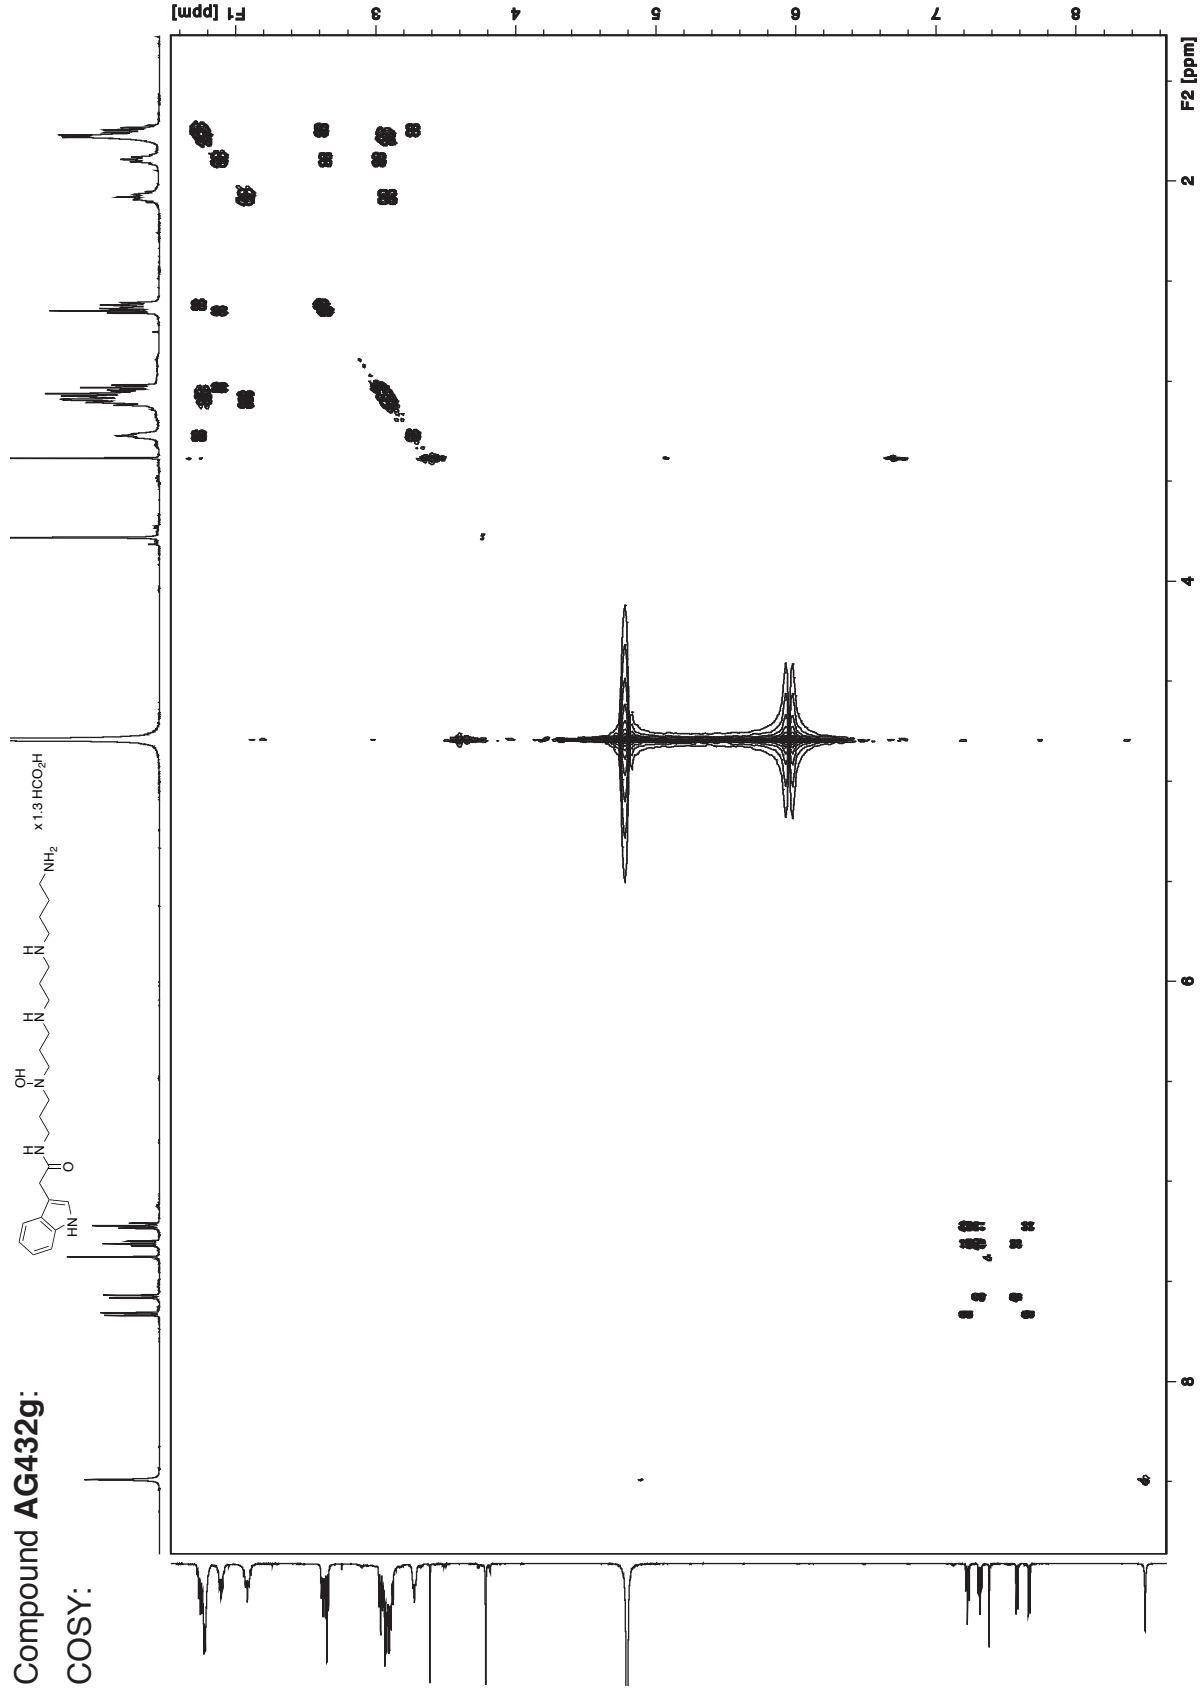



Compound **AG432g**:

HSQC:

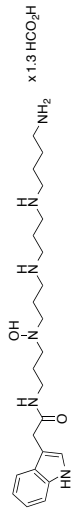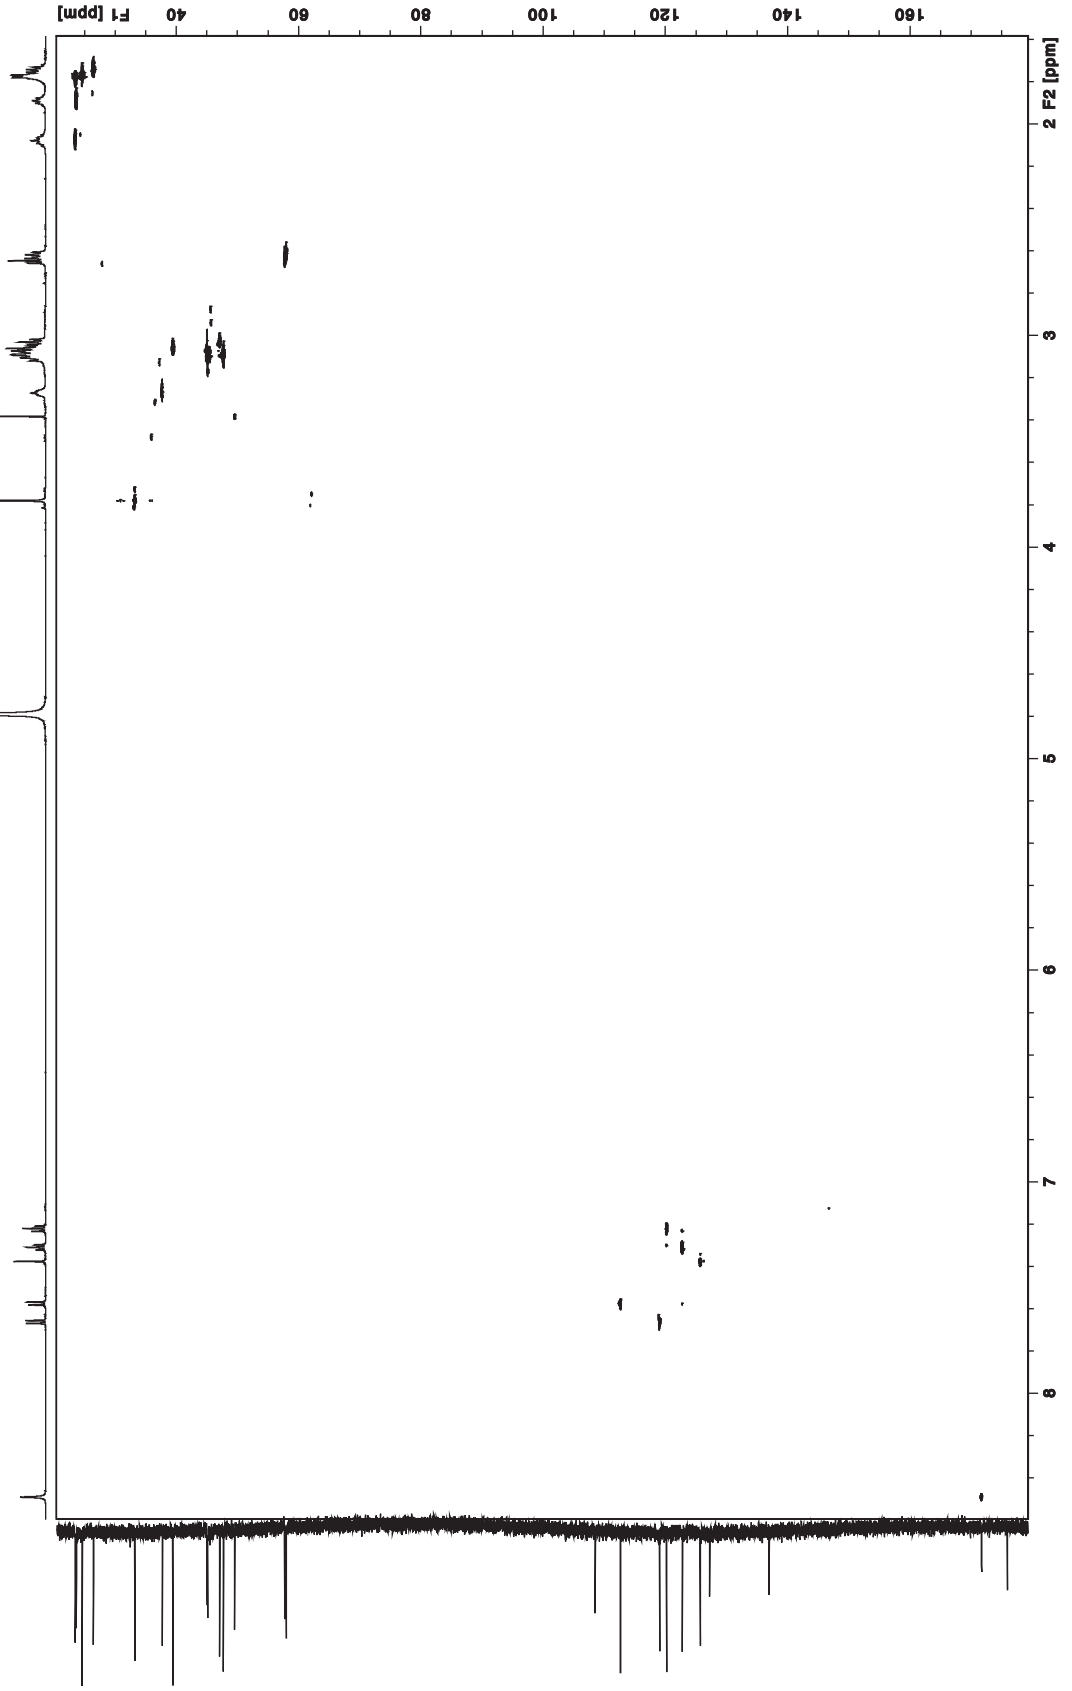

Compound **AG432g**:

HMBC:

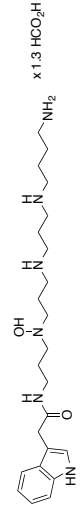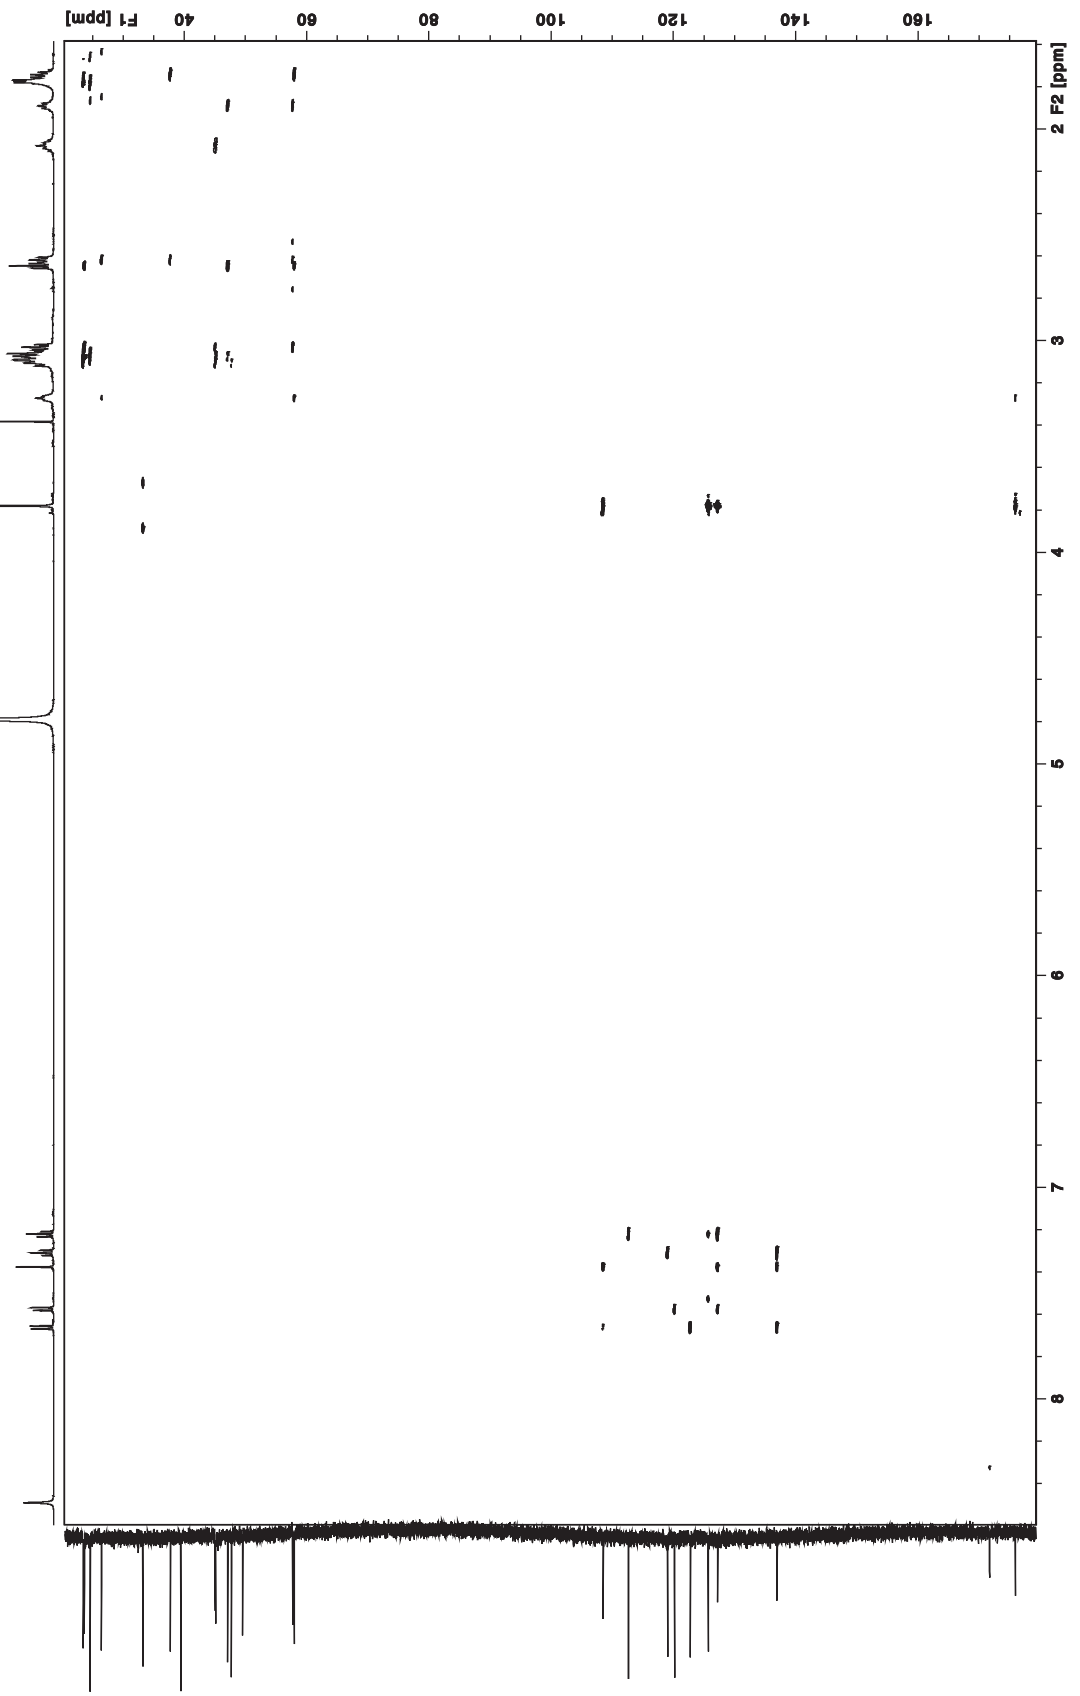

4-OH-Bz3(OH)433

1H - 400 MHz

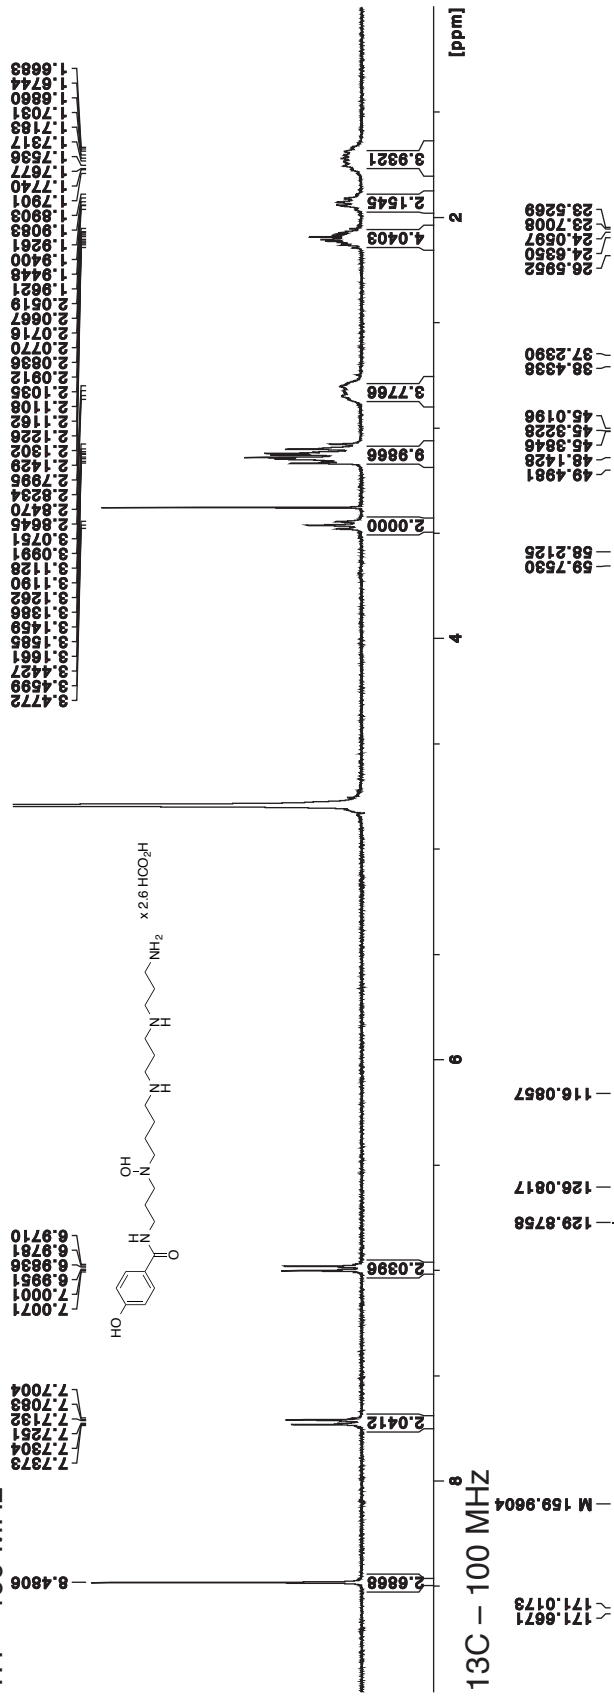

13C - 100 MHz

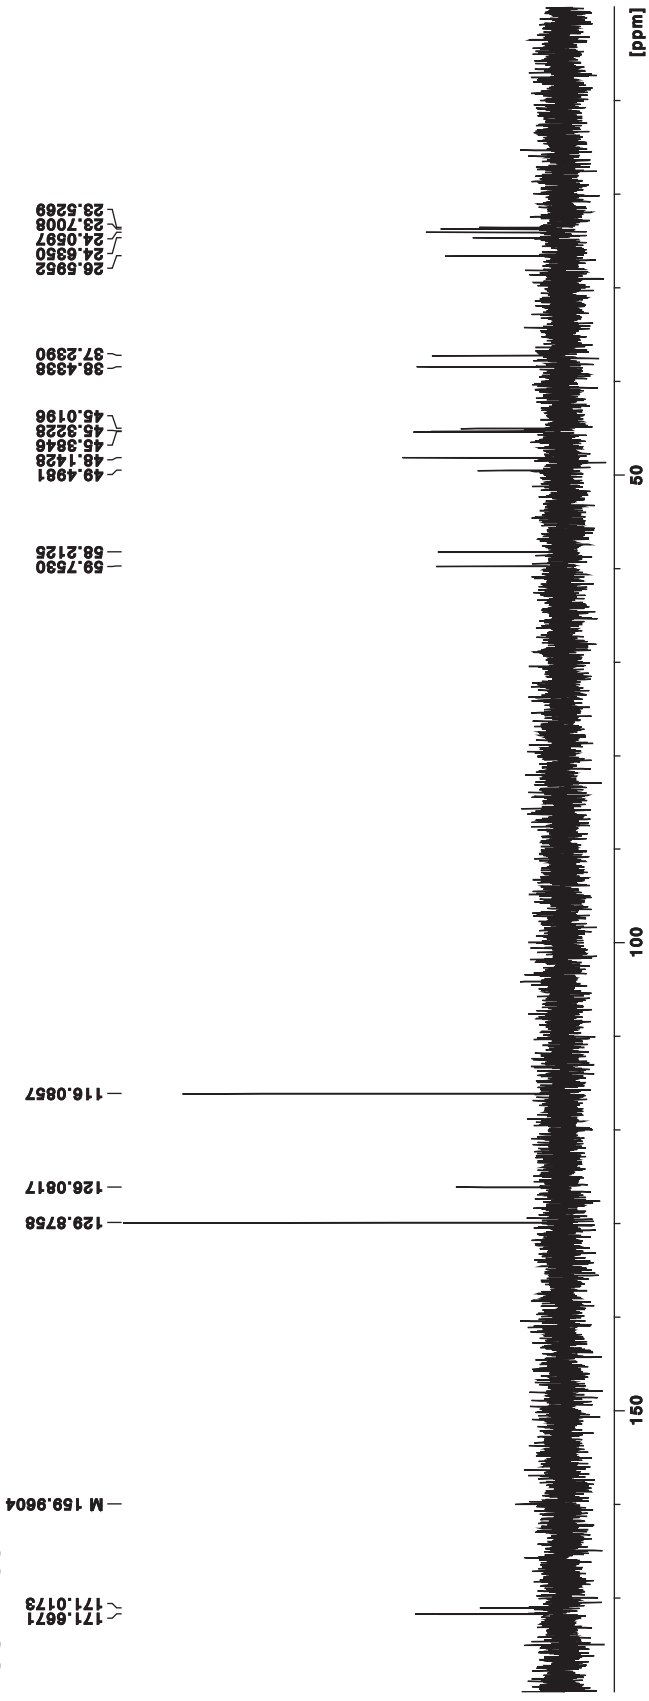

4-OH-Bz3(OH)433

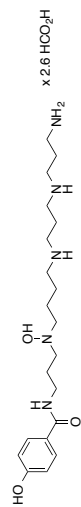

COSY:

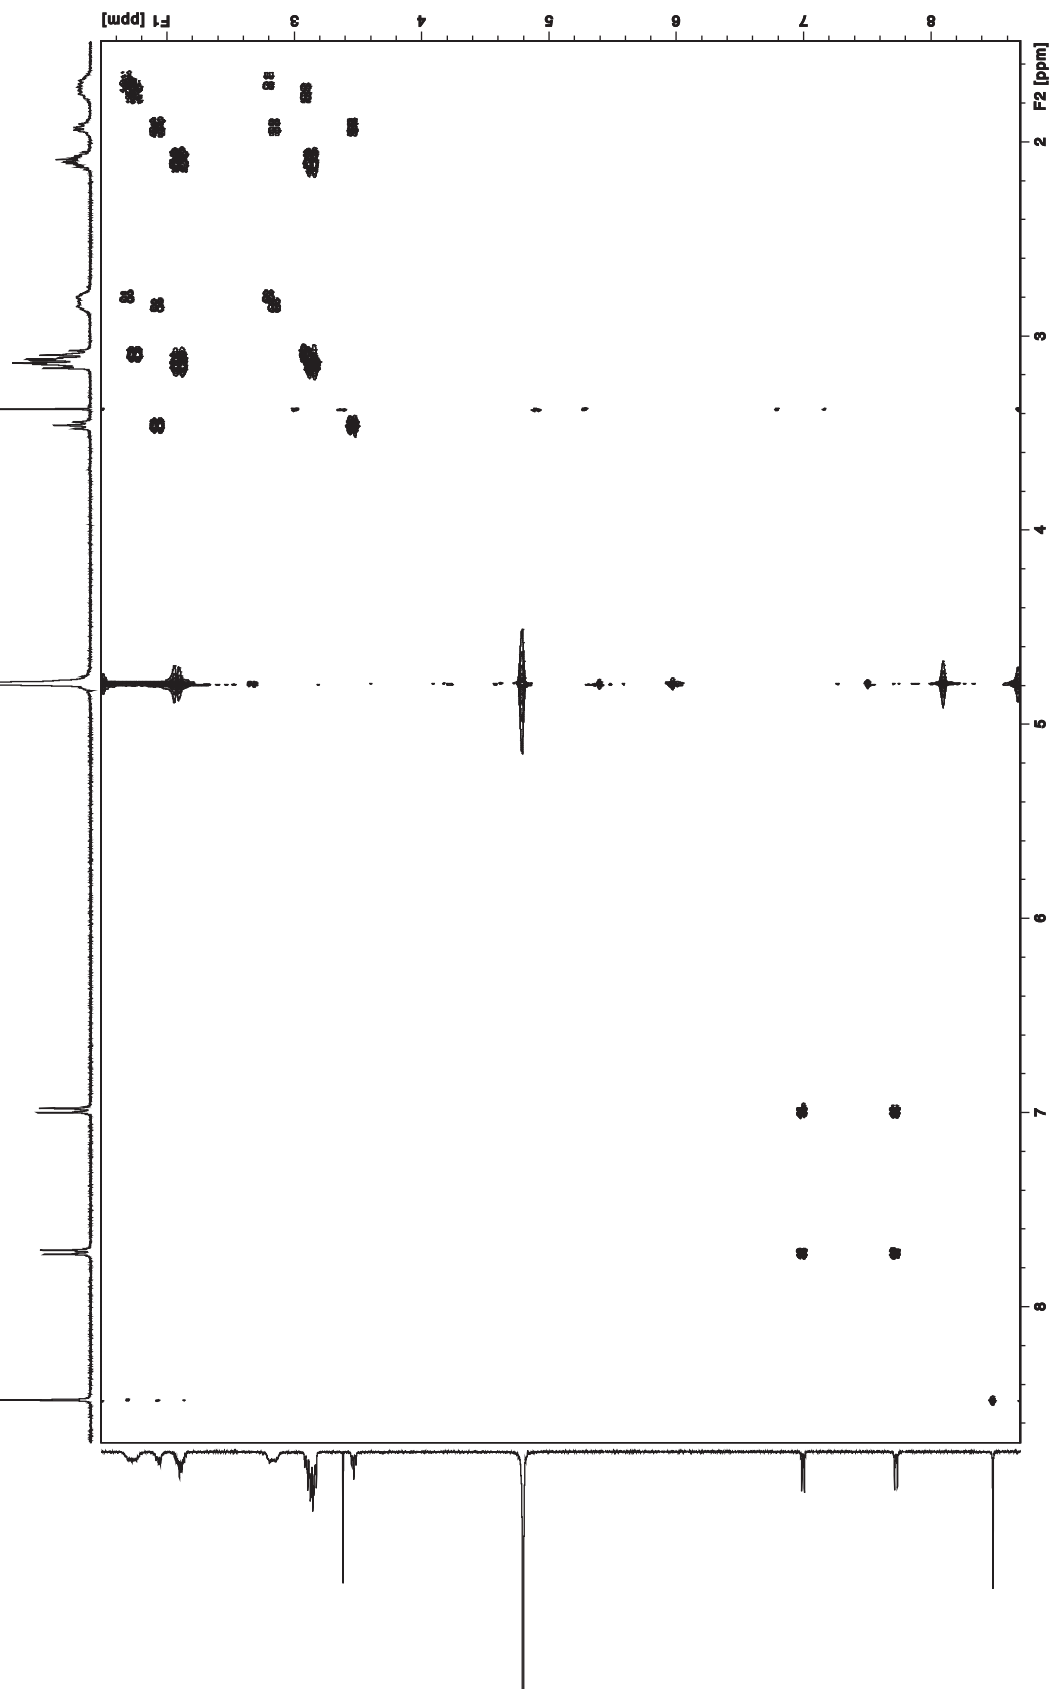

4-OH-Bz3(OH)433:

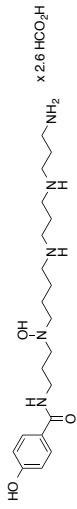

HSQC:

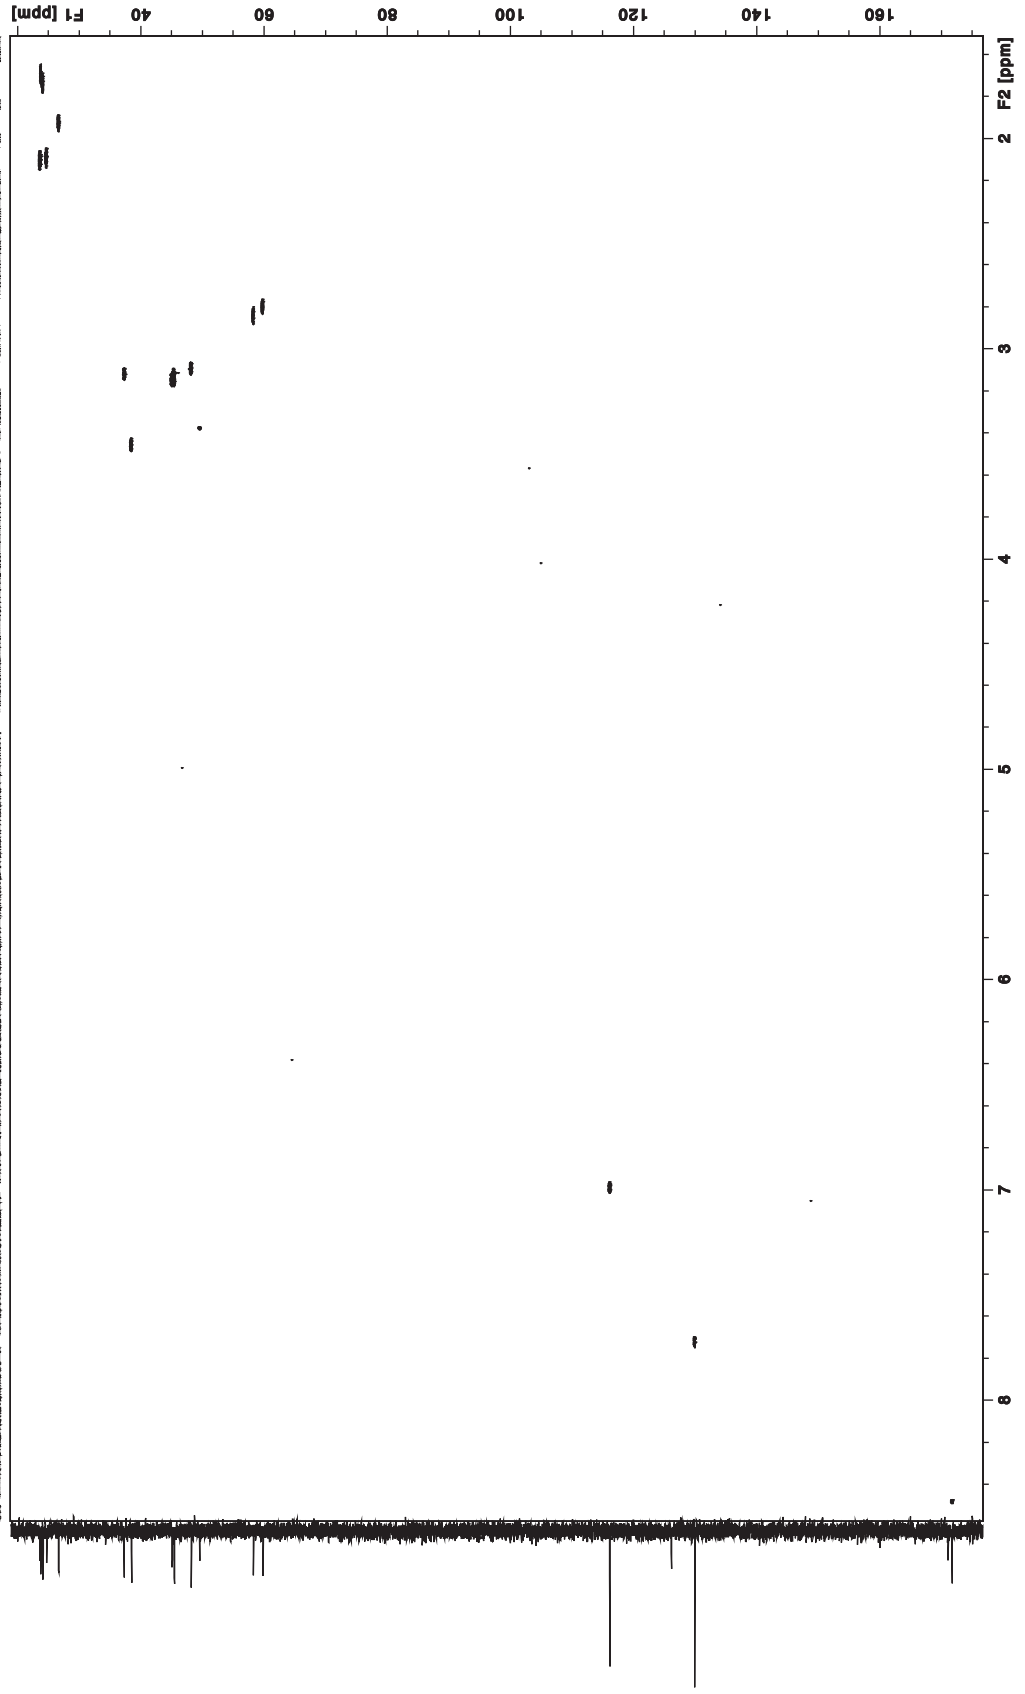

4-OH-Bz3(OH)433

HMBC:

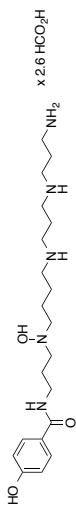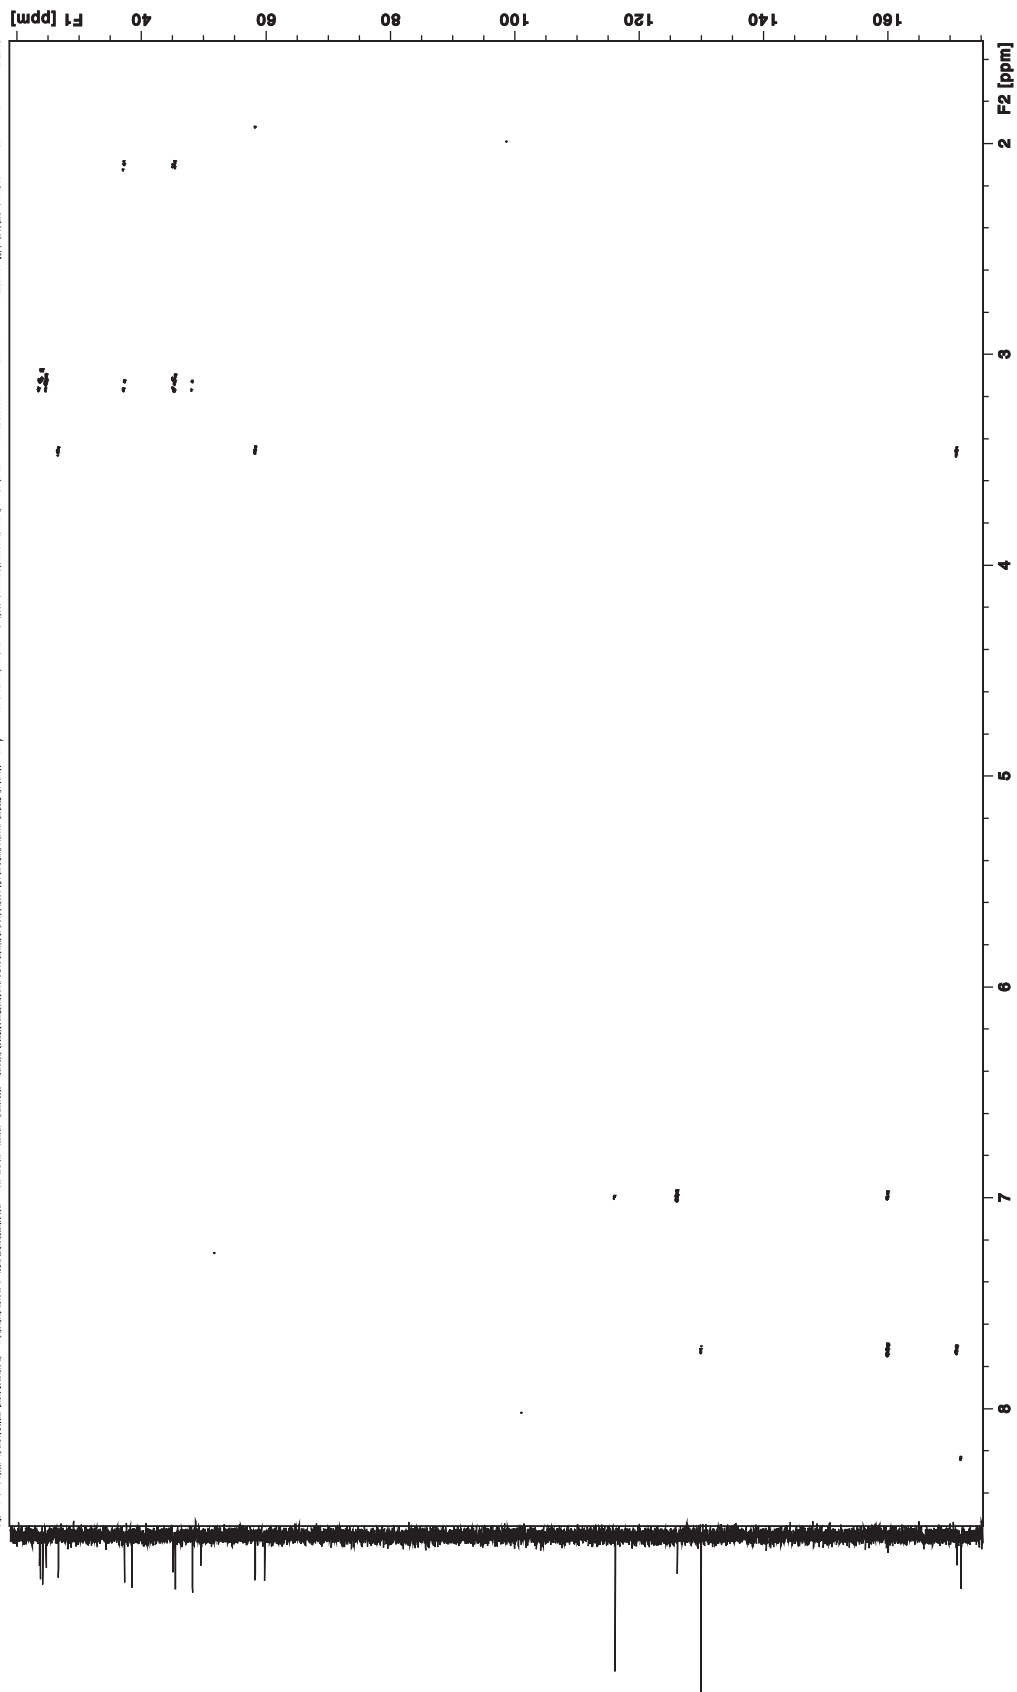

LF448A

1H - 500 MHz

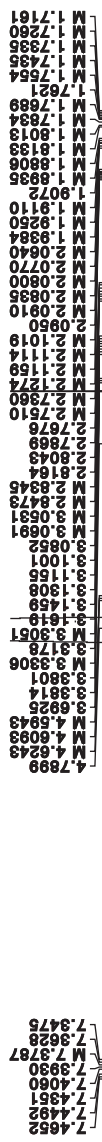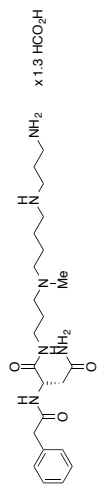

13C - 125 MHz

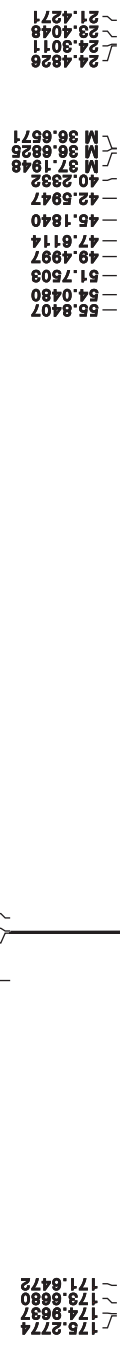

LF448A

COSY:

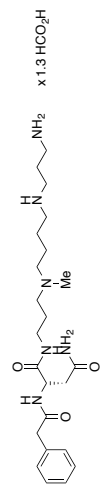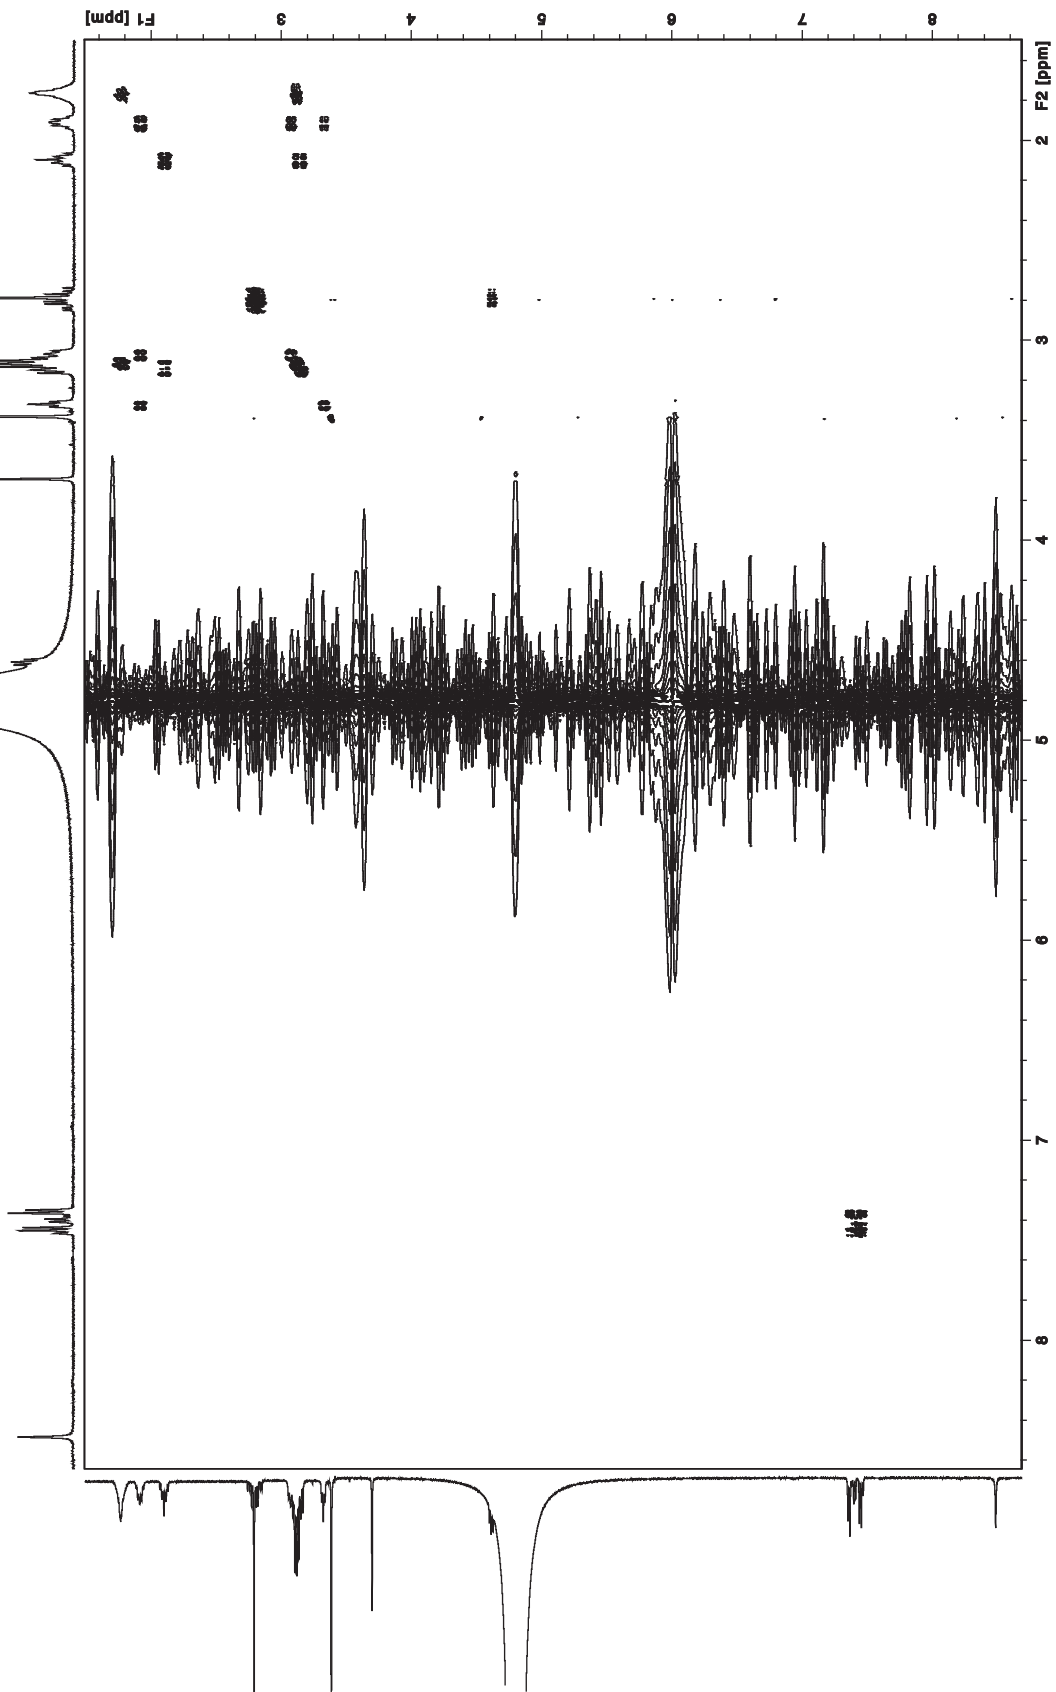



LF448A

HSQC:

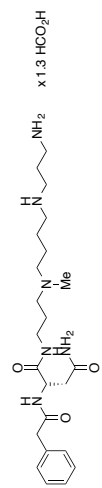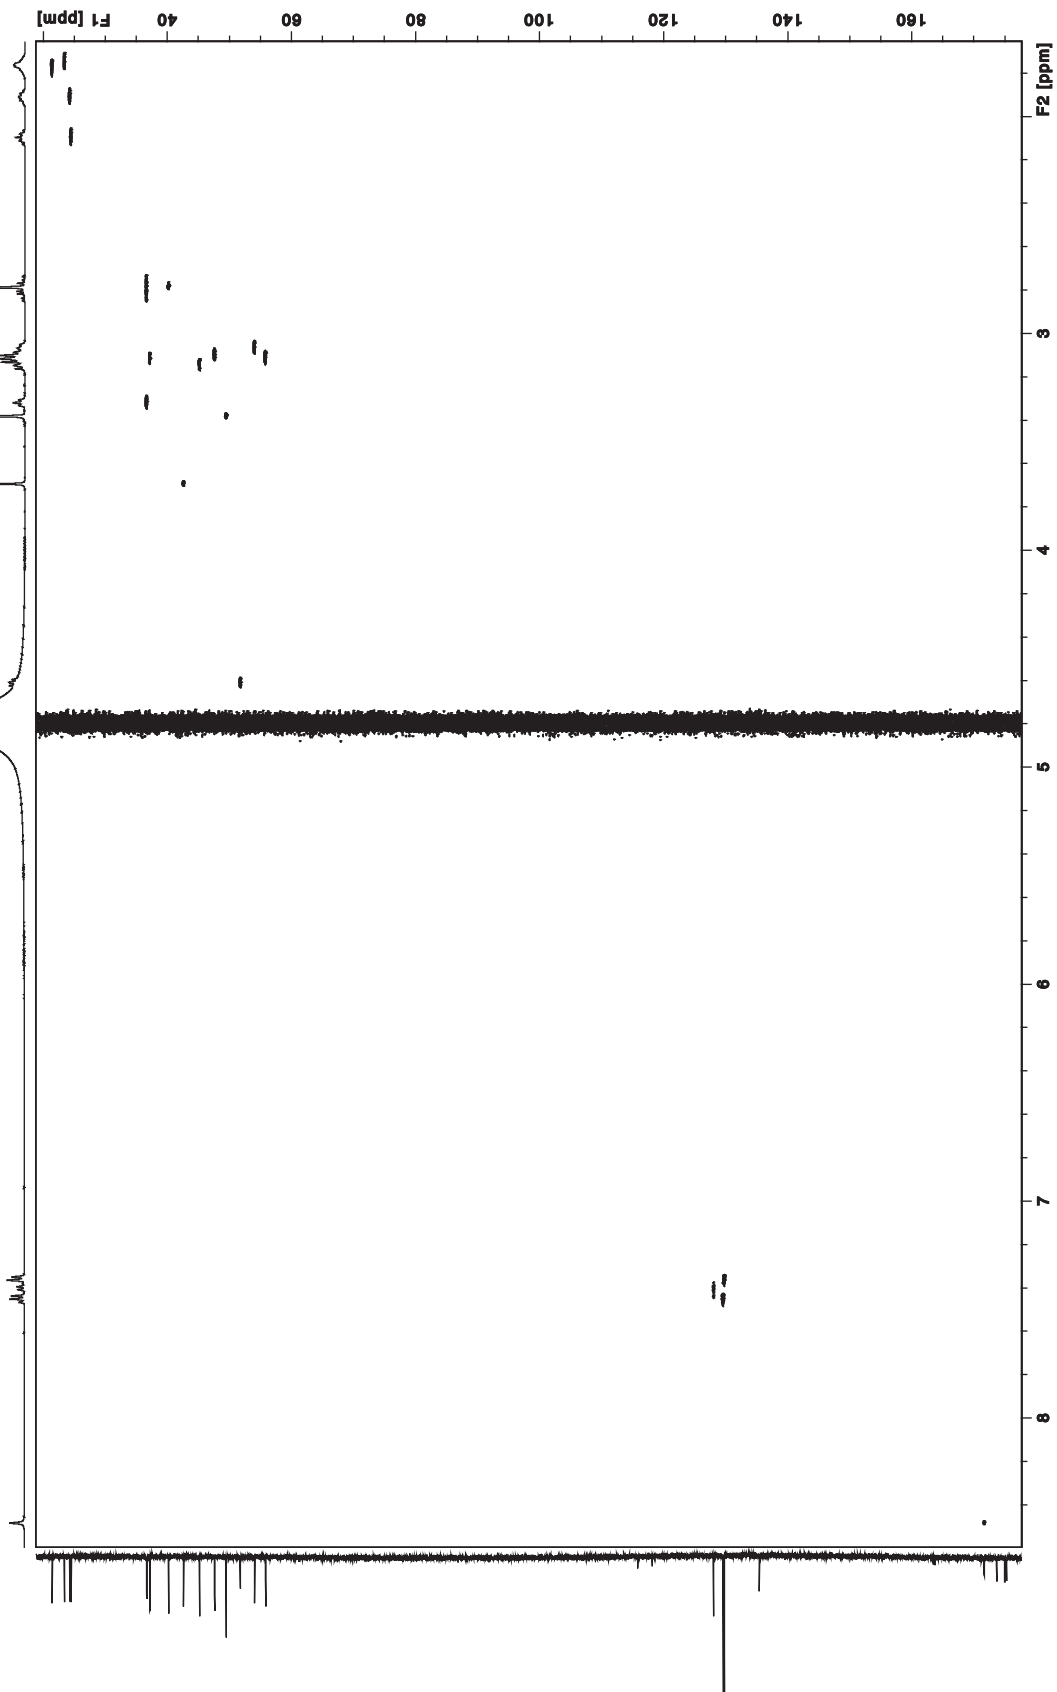

LF448A

HMBC:

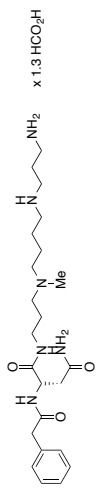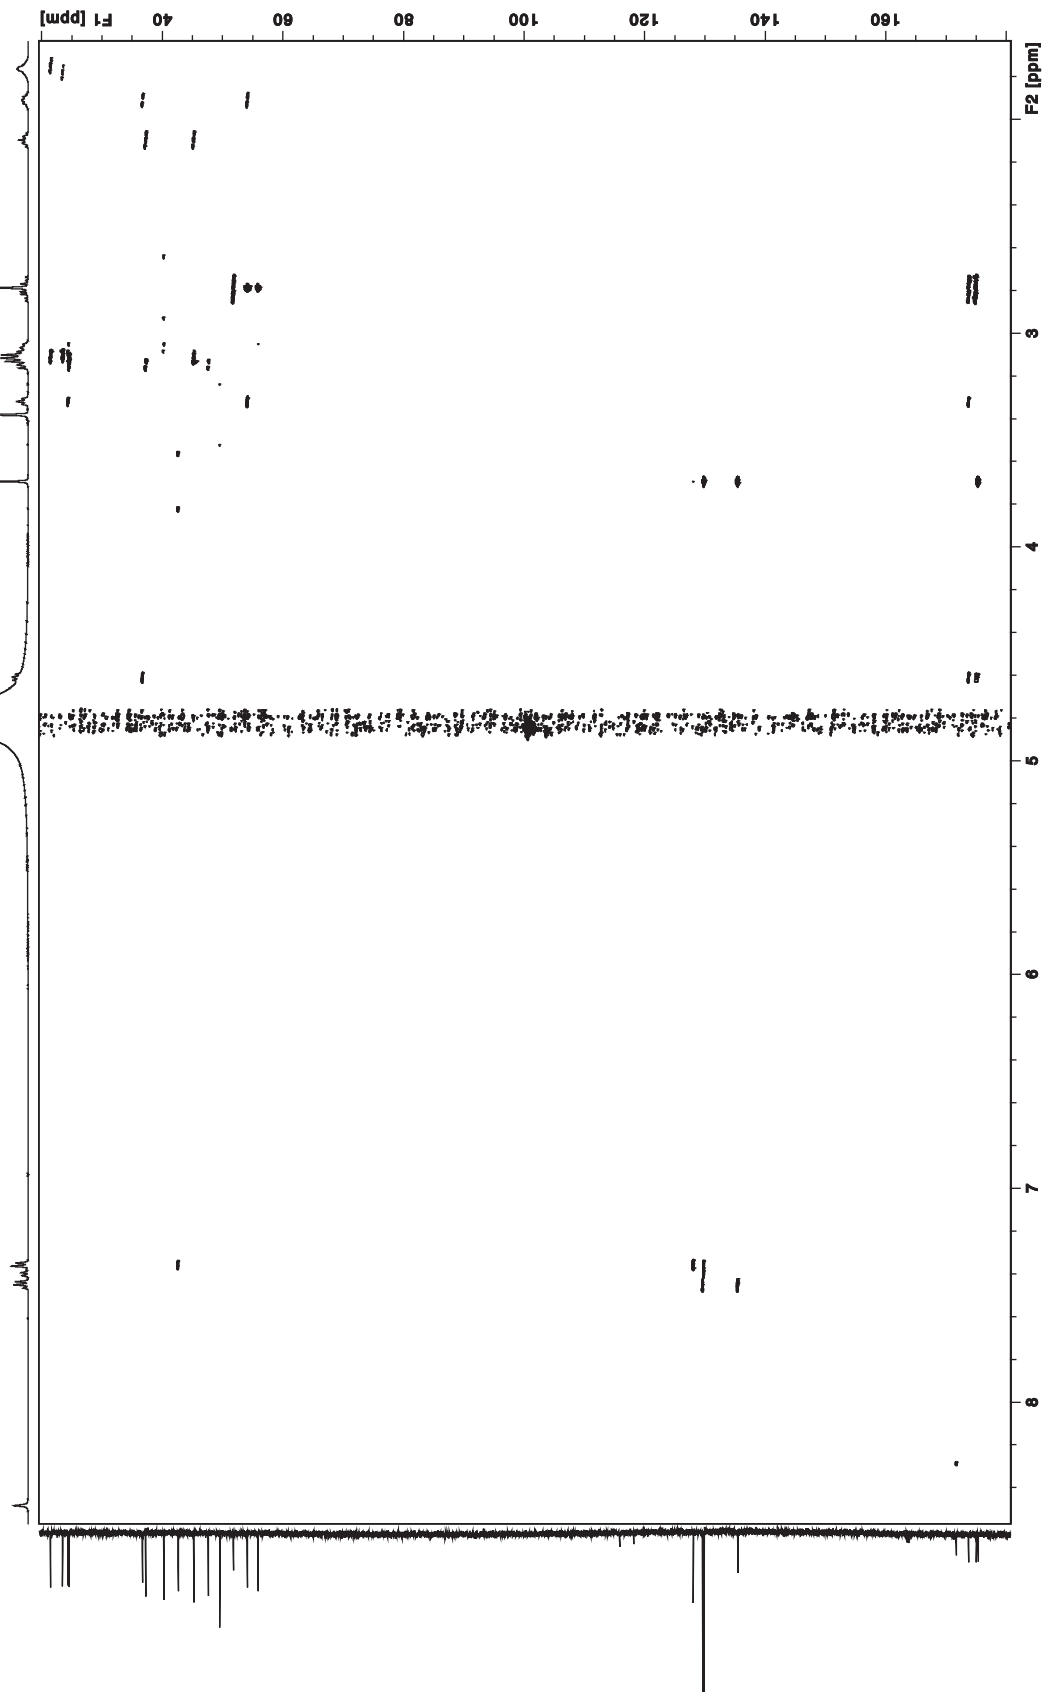

LF487A

1H - 500 MHz

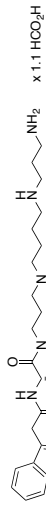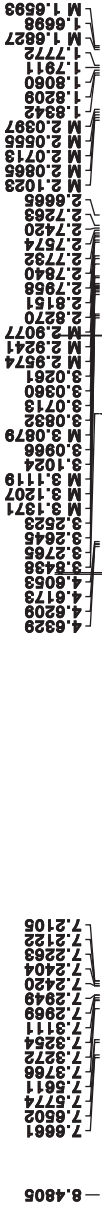

13C - 125 MHz

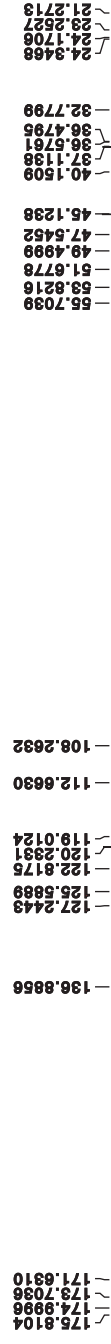

LF487A

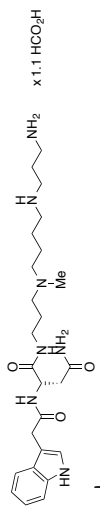

COSY:

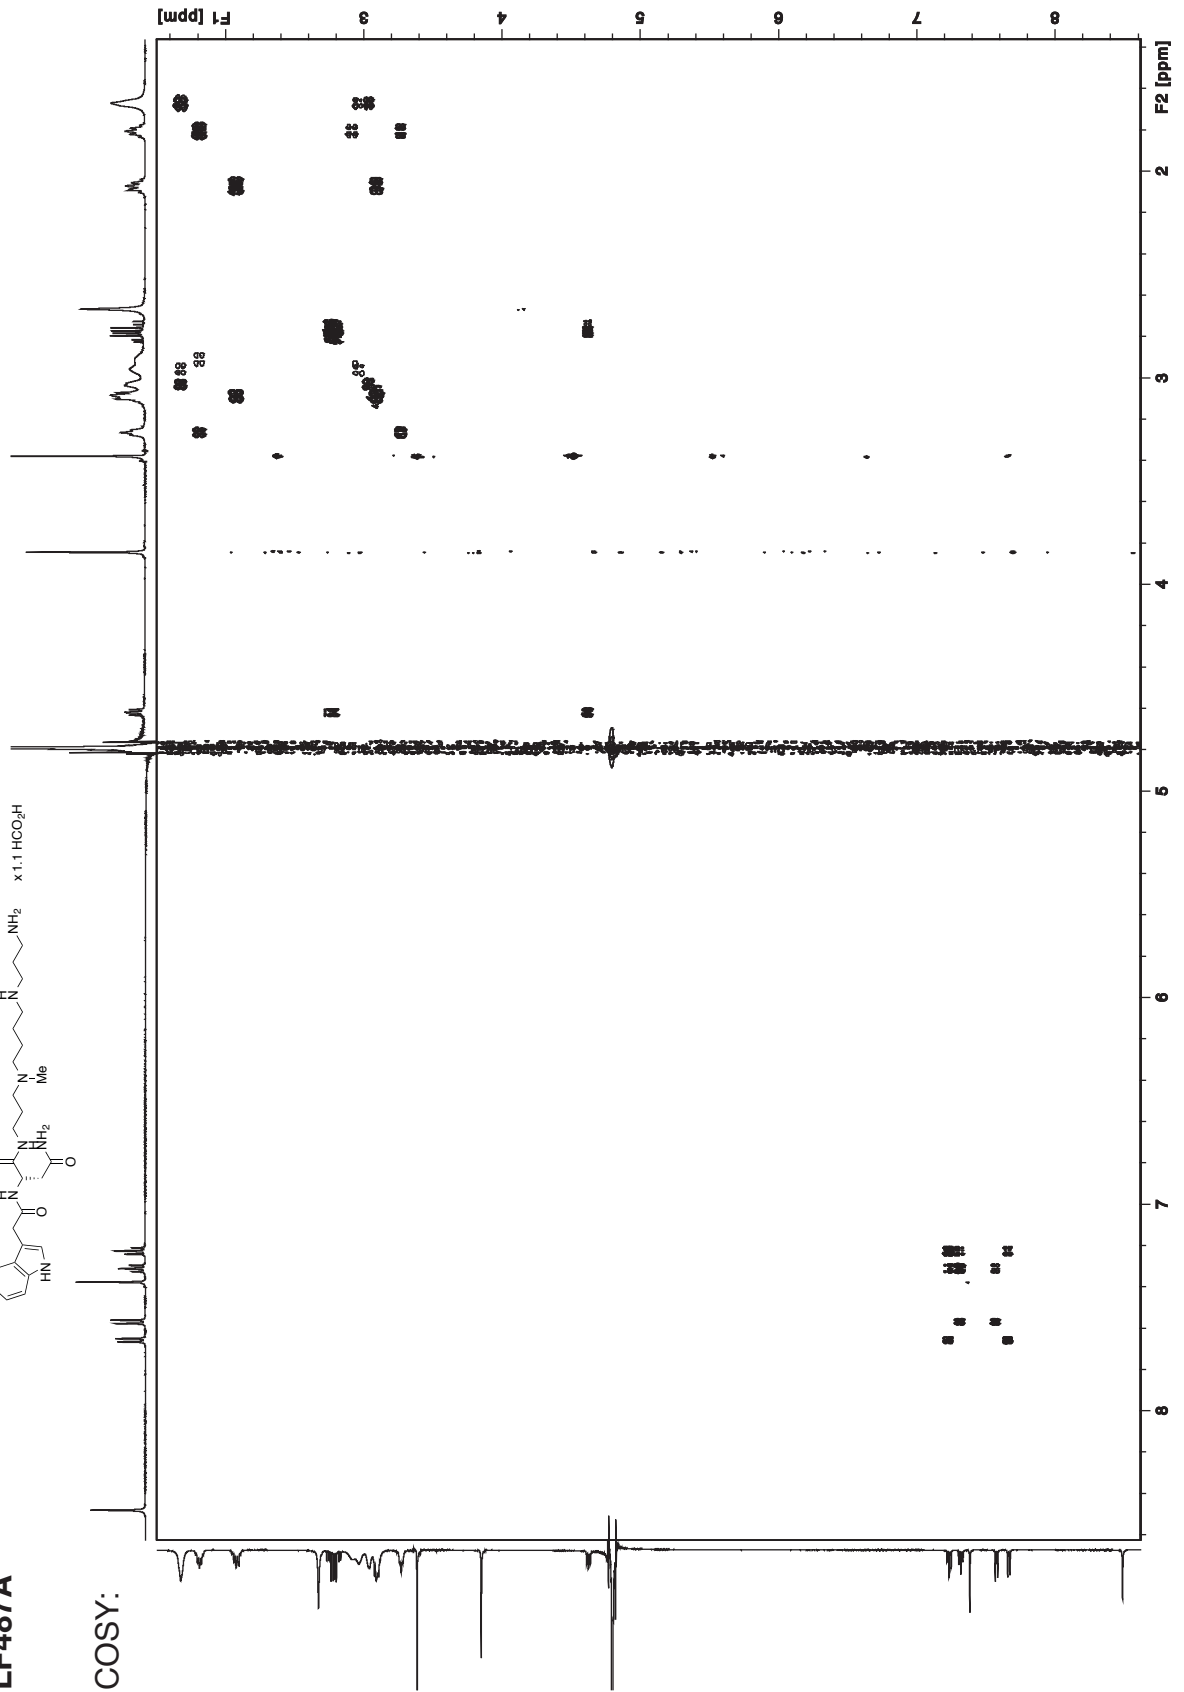

LF487A

HSQC:

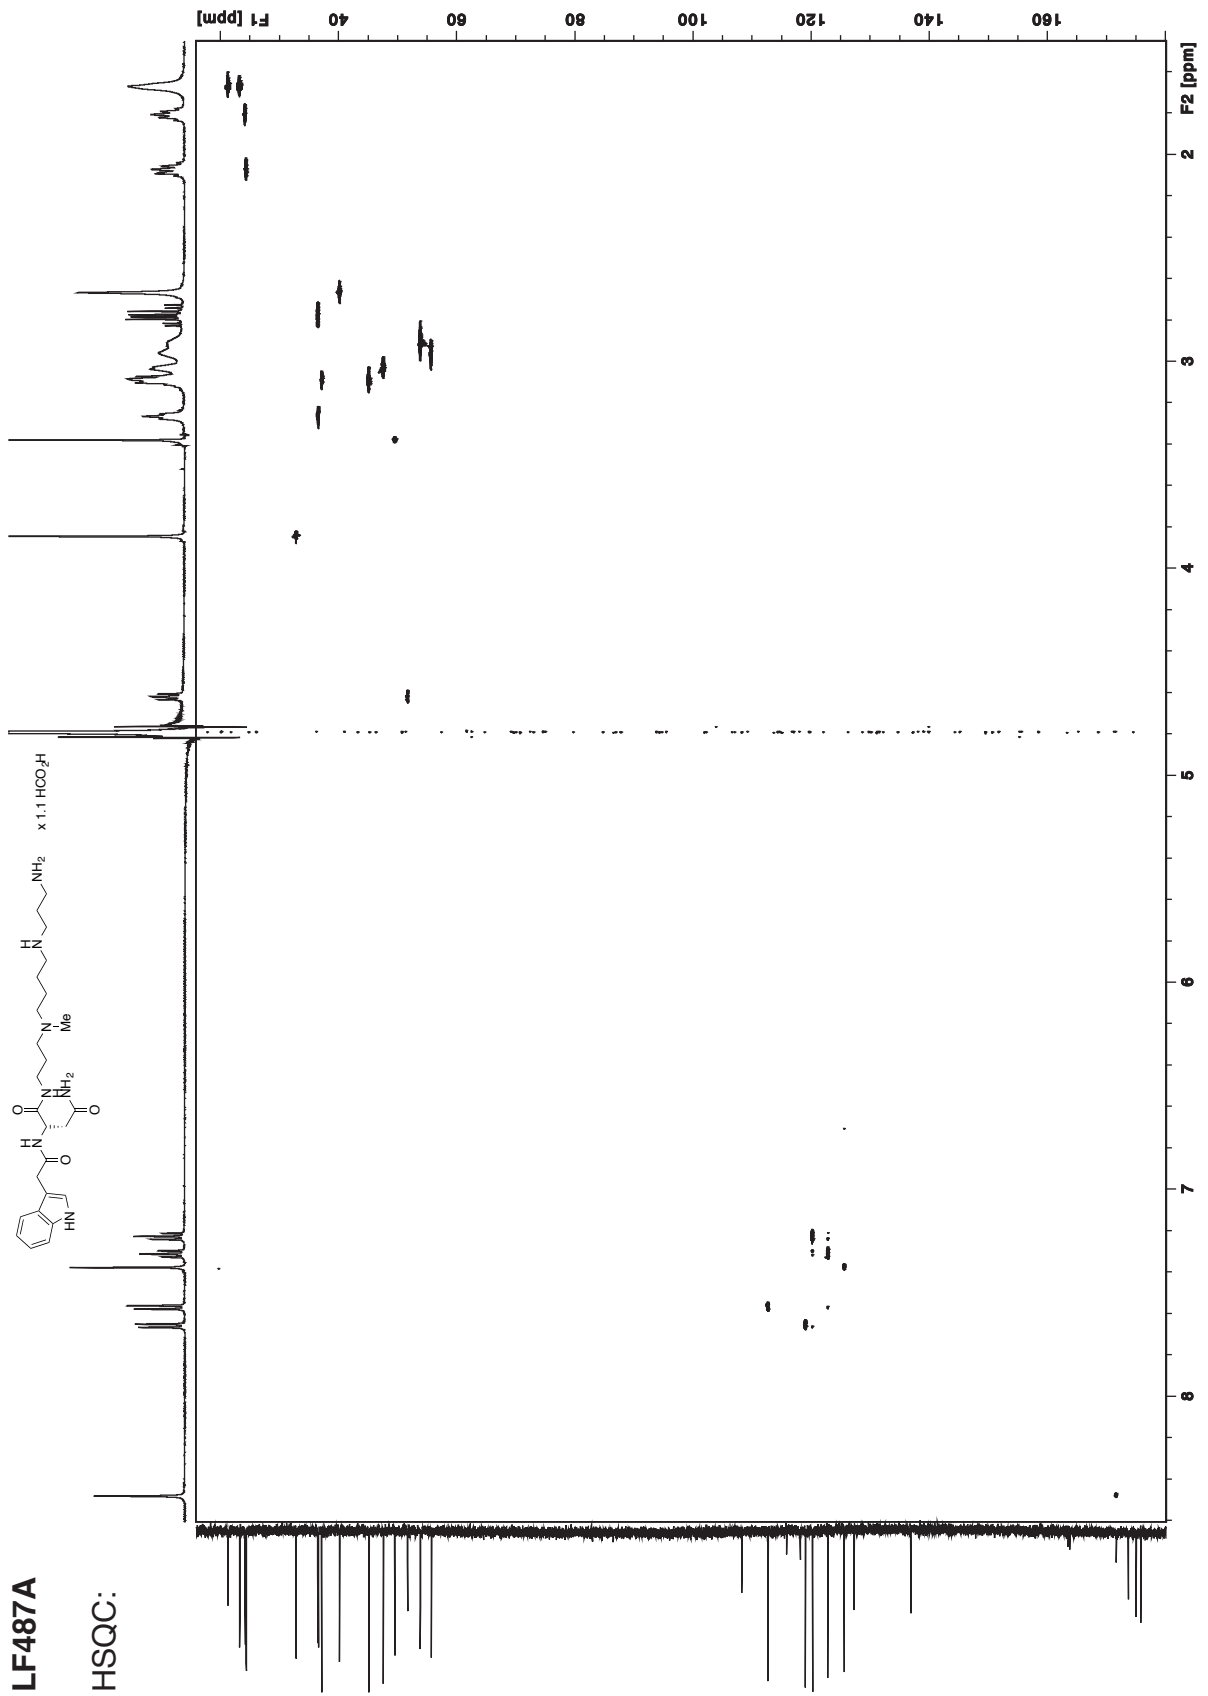

LF487A

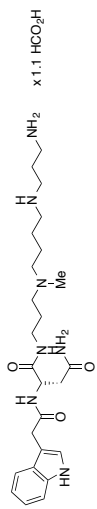

HMBC:

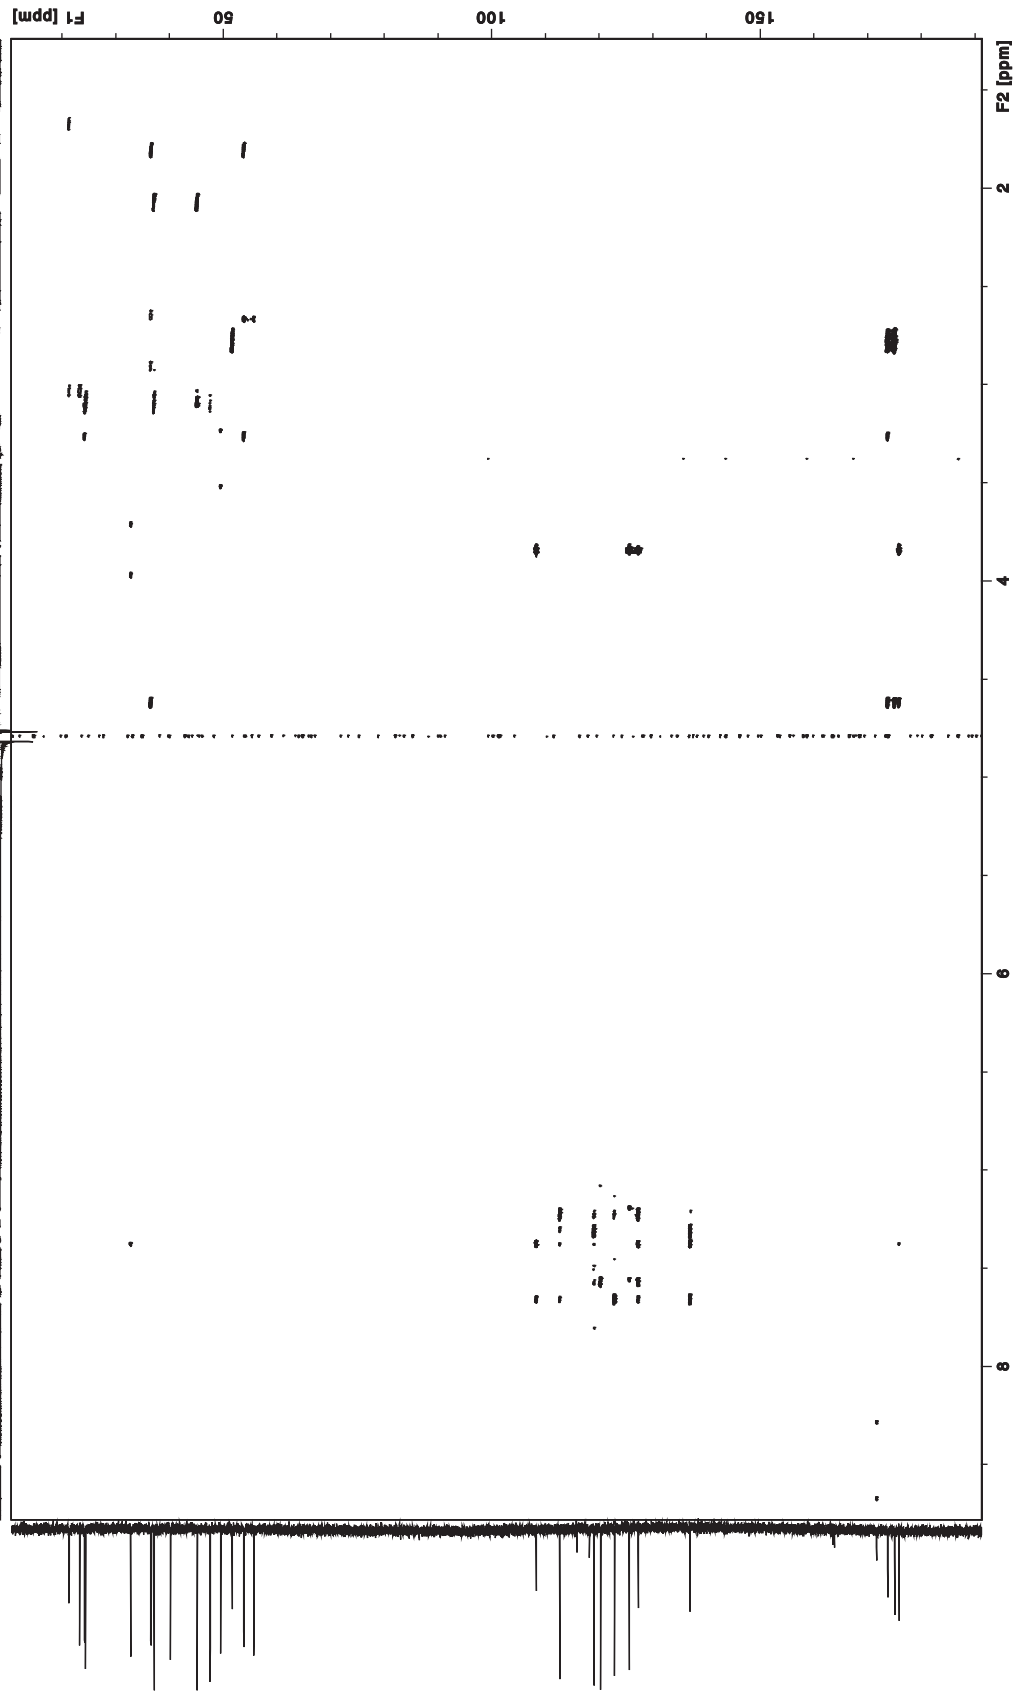

Compound **29**

<sup>1</sup>H – 400 MHz

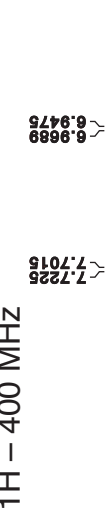

7.7226

7.7015

6.9689

6.9475

- M 4.7216

3.5422

3.5269

3.5123

3.4968

3.2566

3.2441

3.1398

3.1116

3.0912

3.0762

2.8065

2.7863

2.6808

1.9074

1.8742

1.8420

1.7128

1.4973

1.4180

1.4087

1.3408

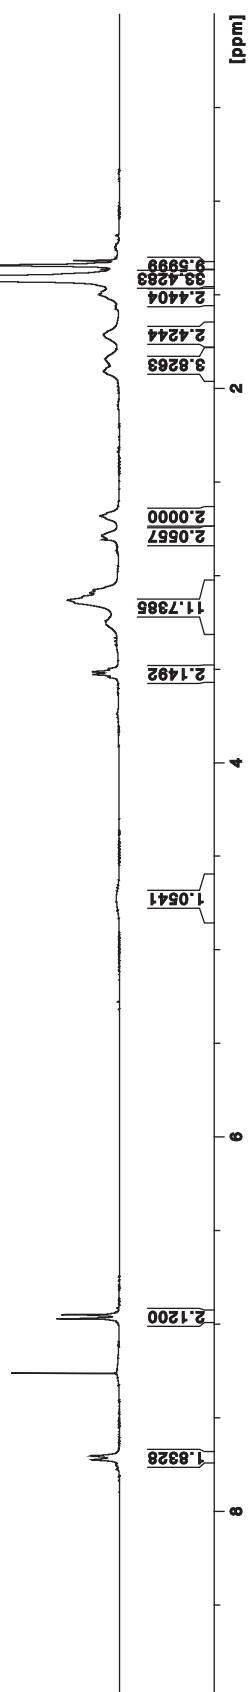

Compound 29

13C – 100 MHz

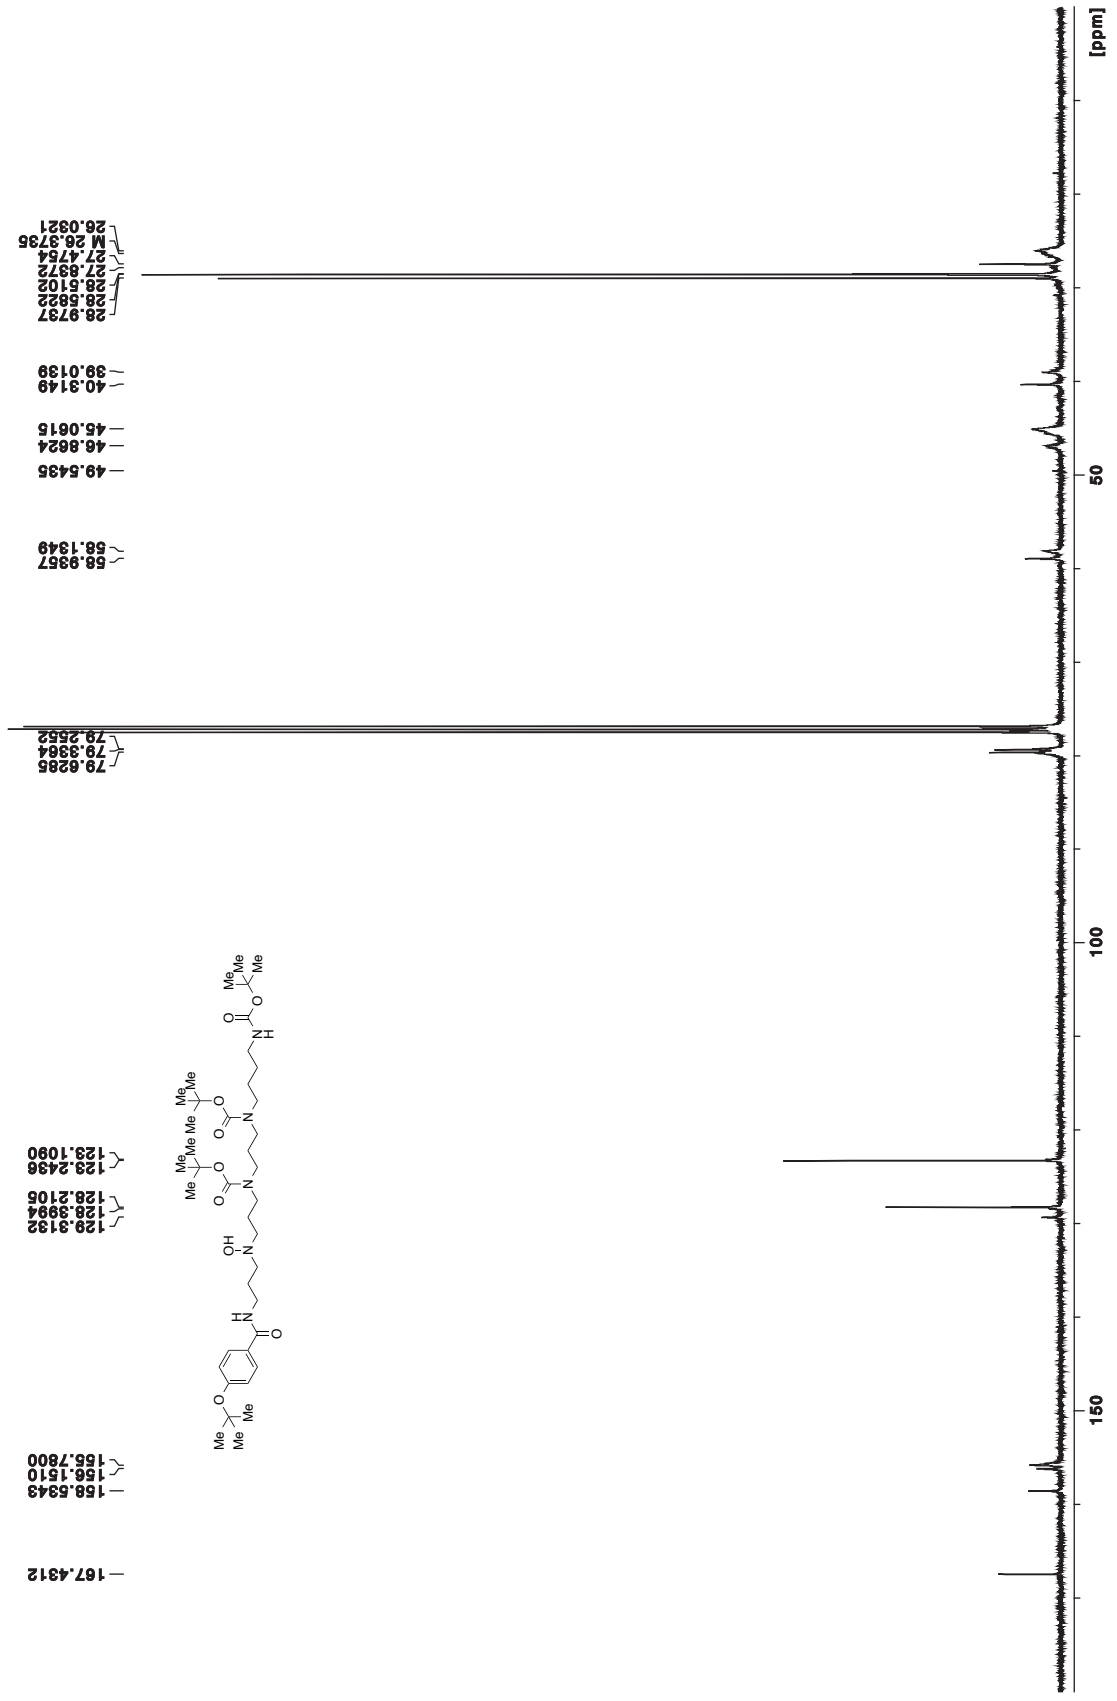



Compound 29

COSY:

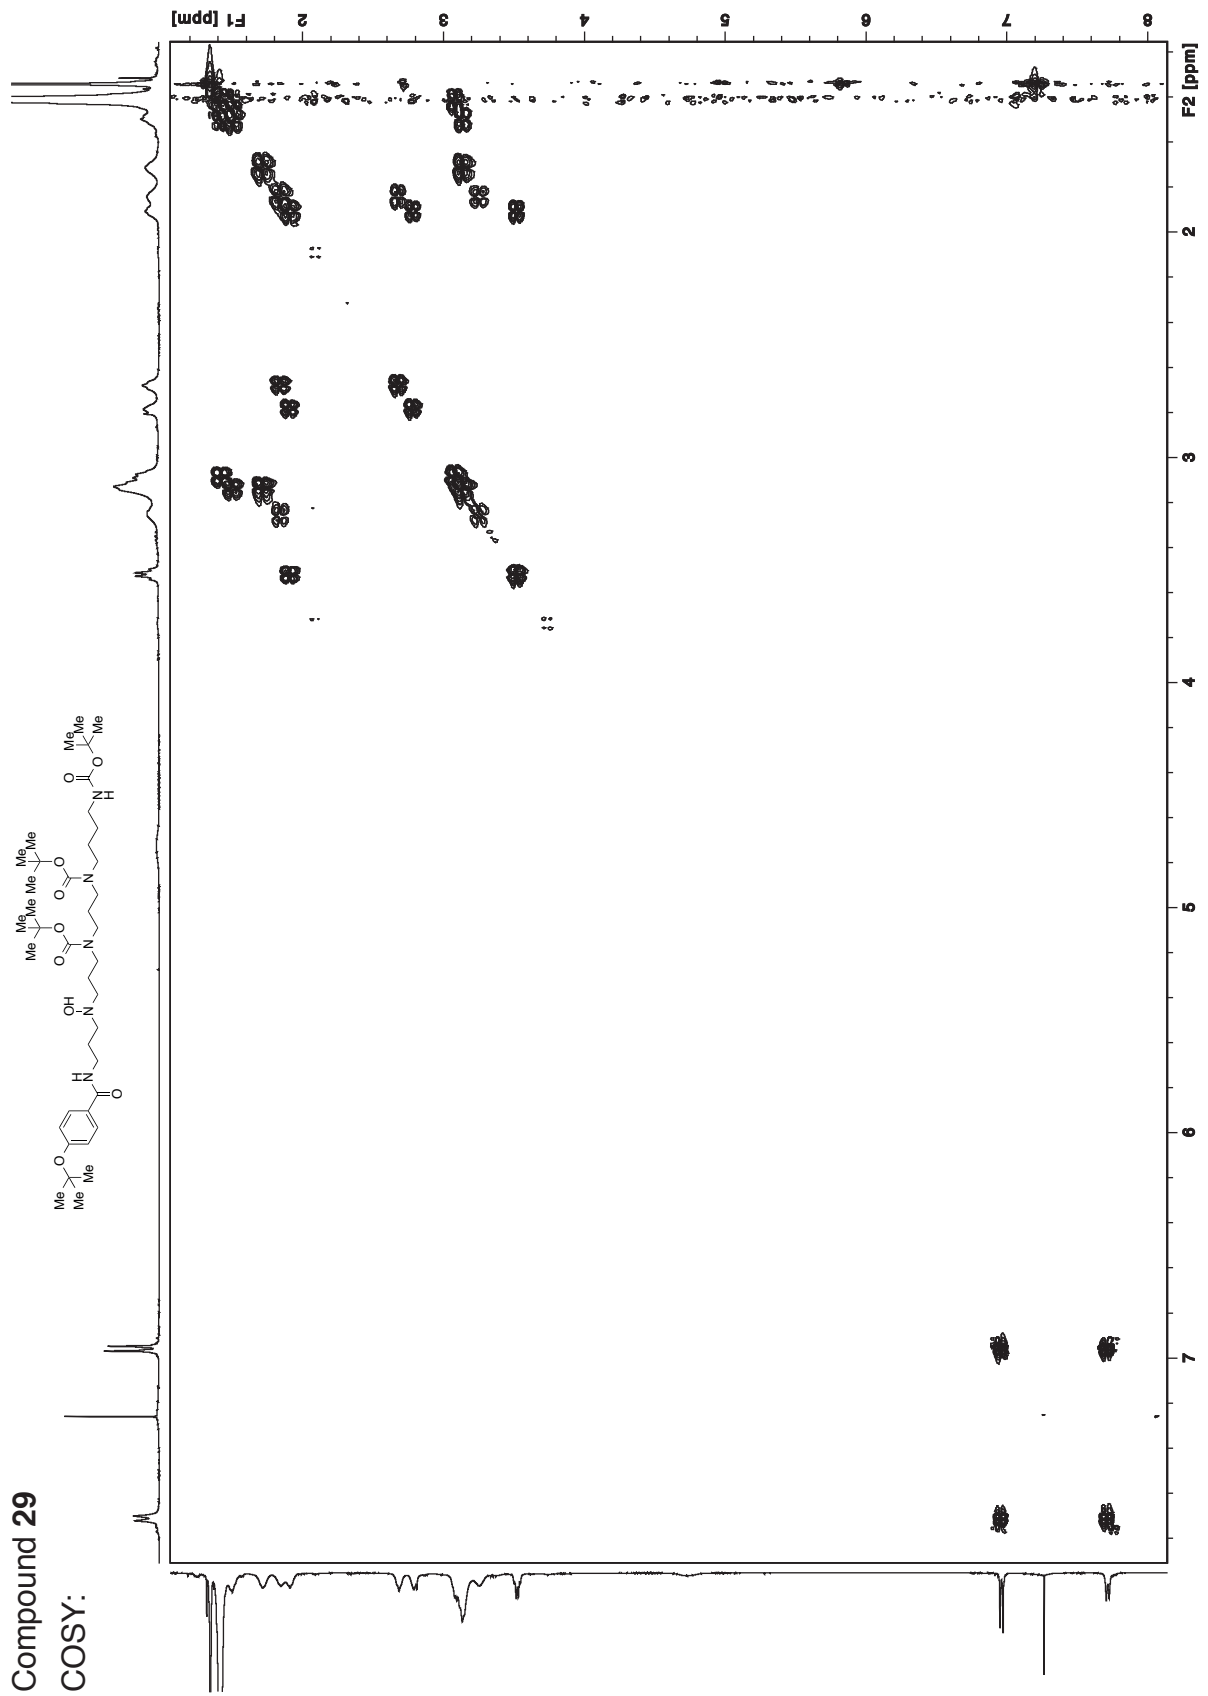

Compound 29

HSQC:

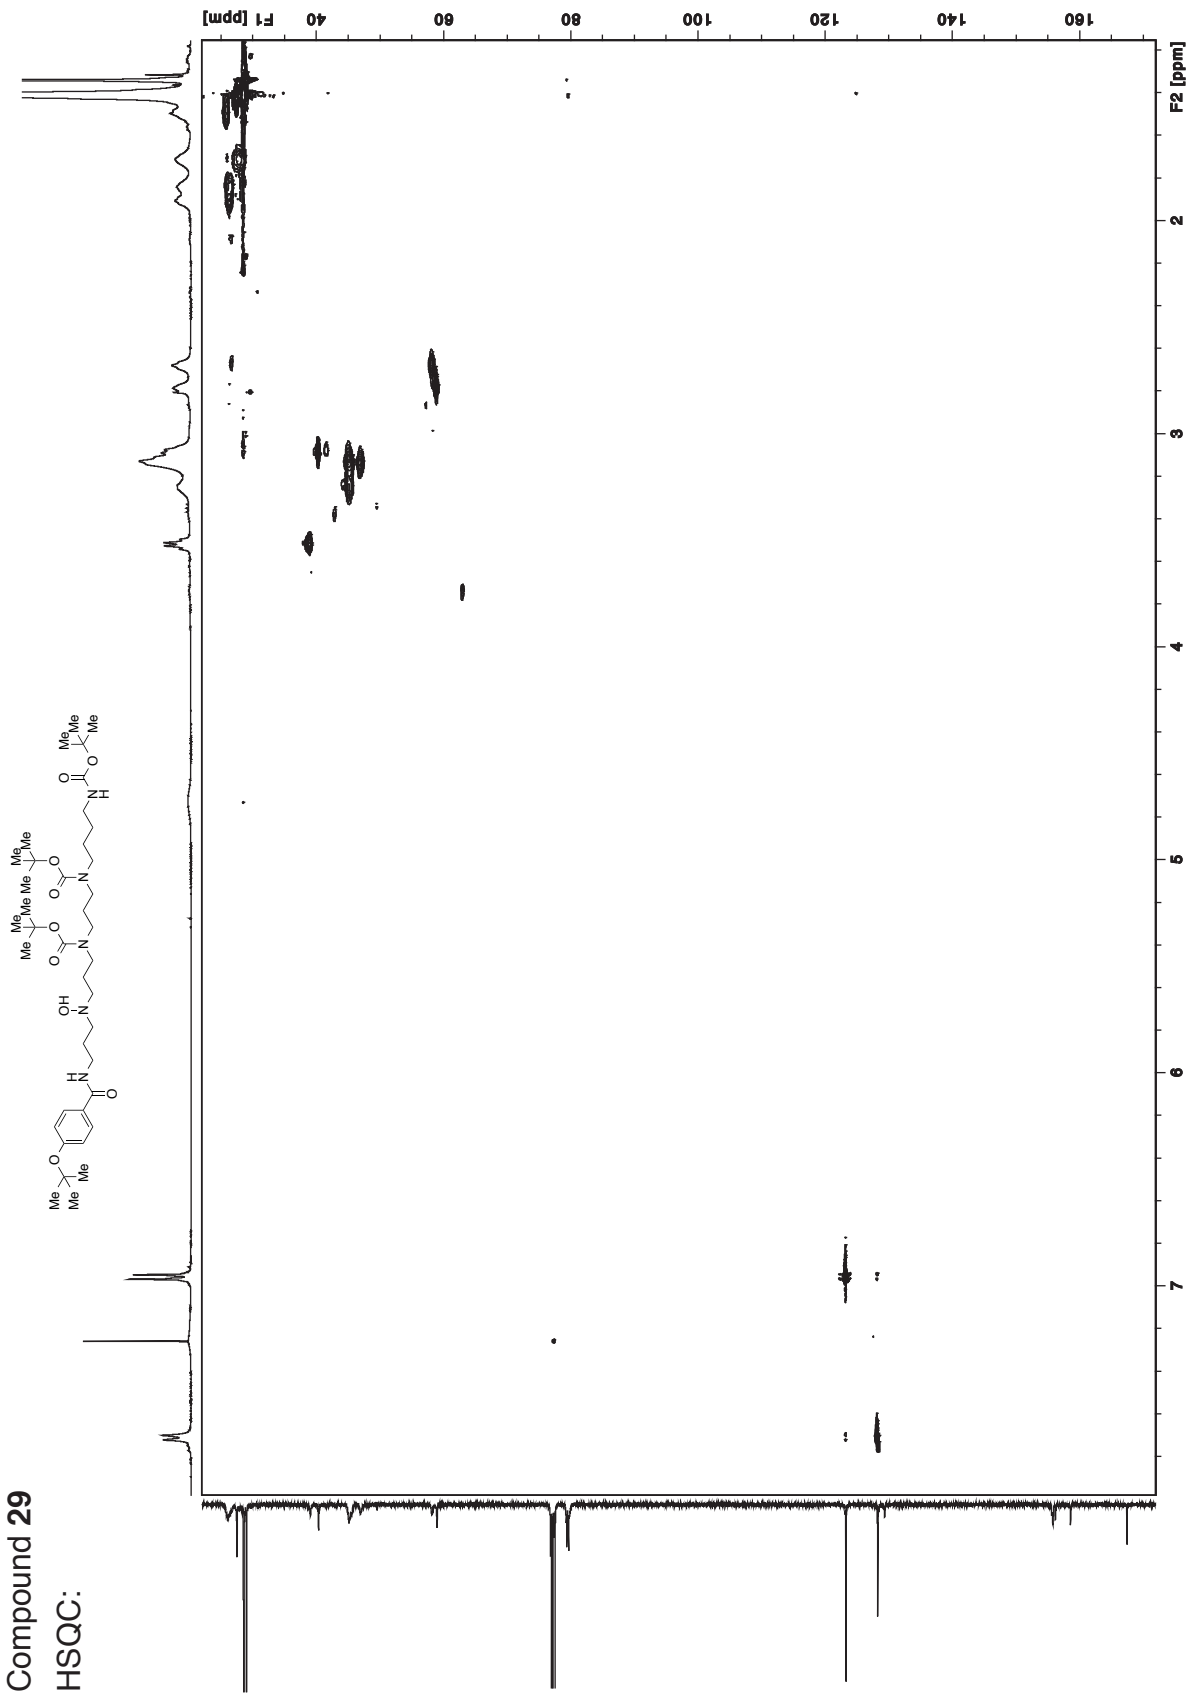

Compound 30

<sup>1</sup>H – 400 MHz

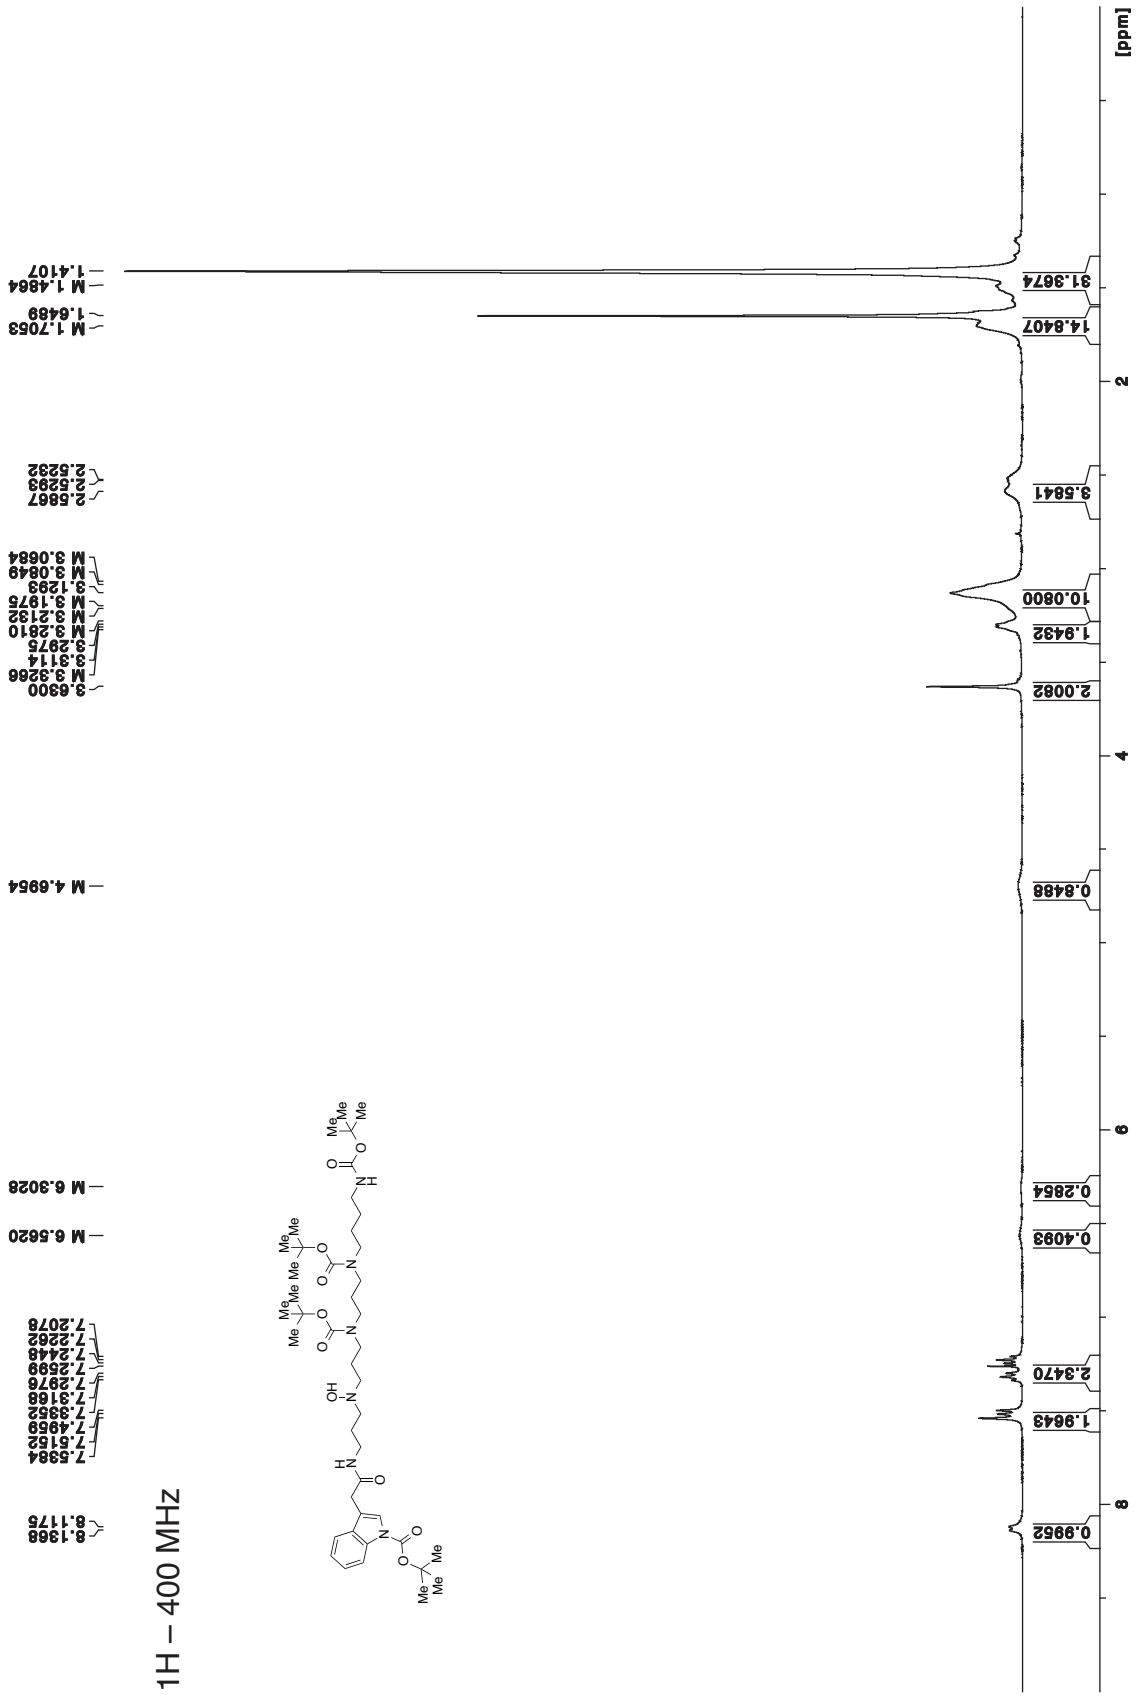

Compound 30

<sup>1</sup>H – 100 MHz

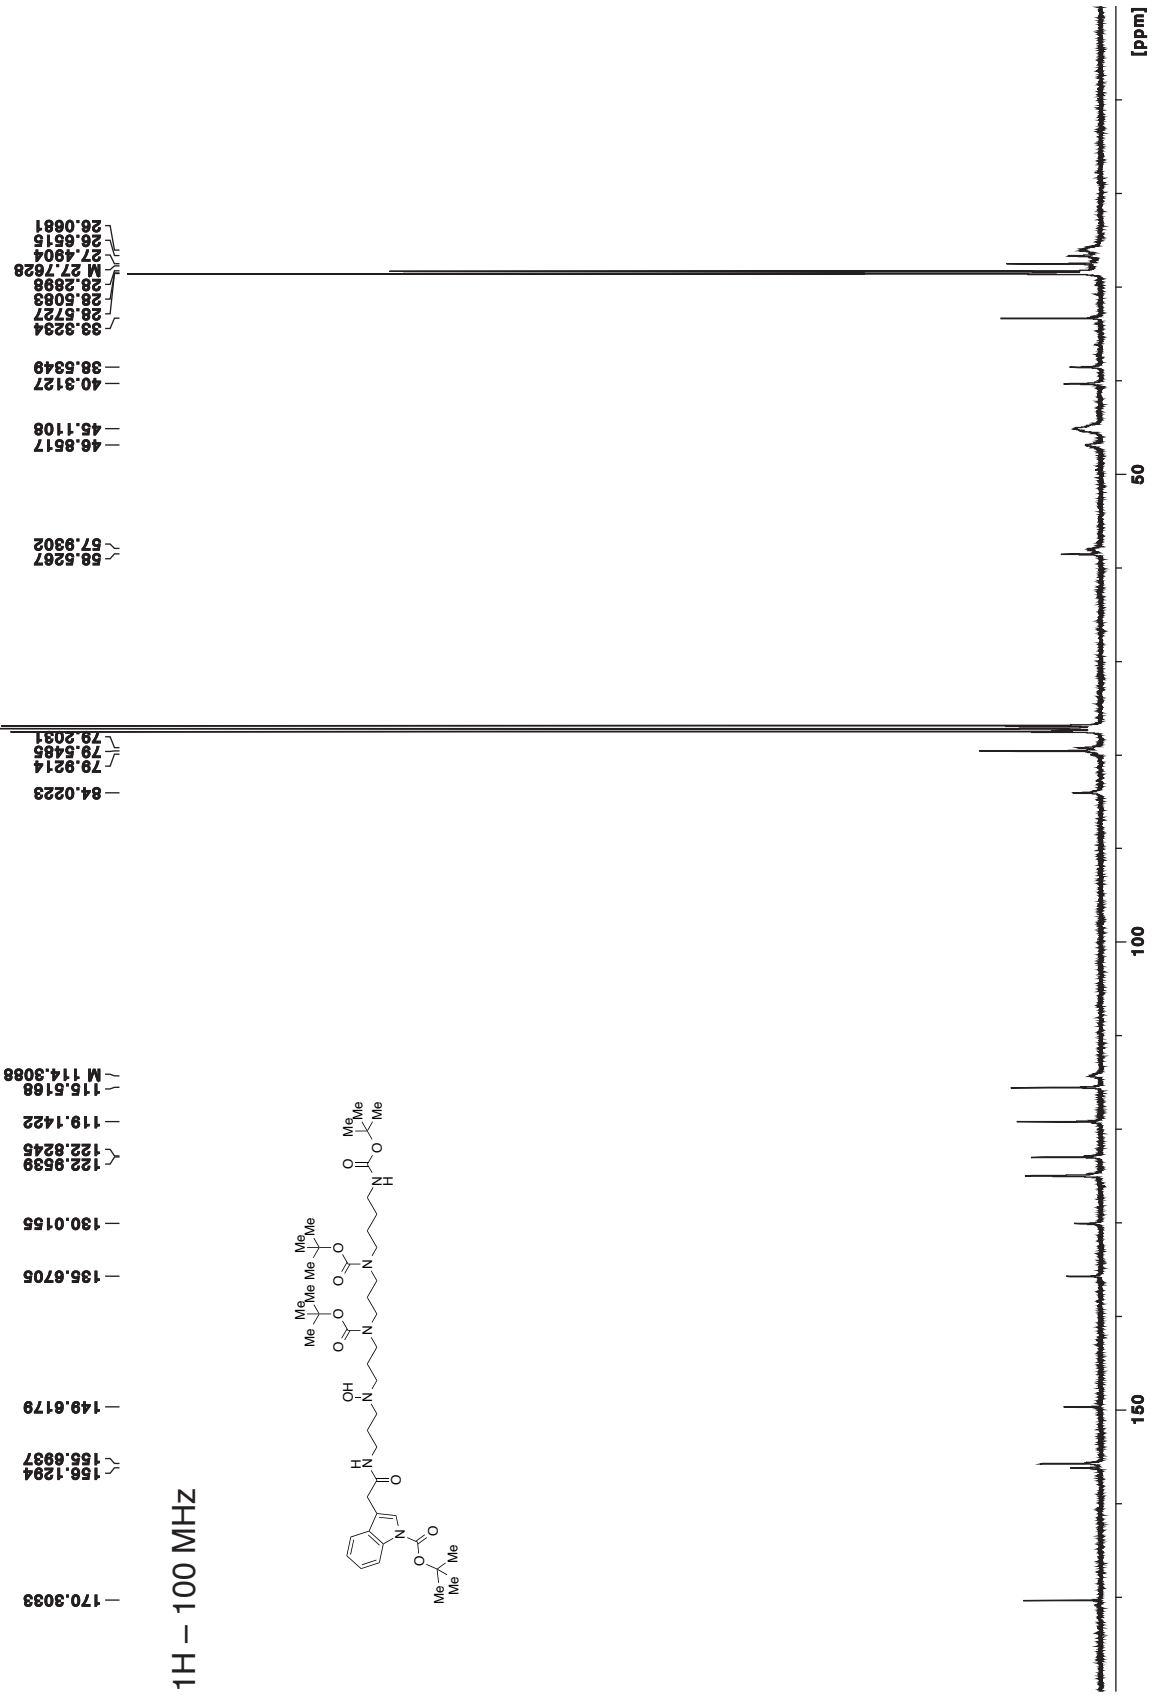

Compound 30

COSY:

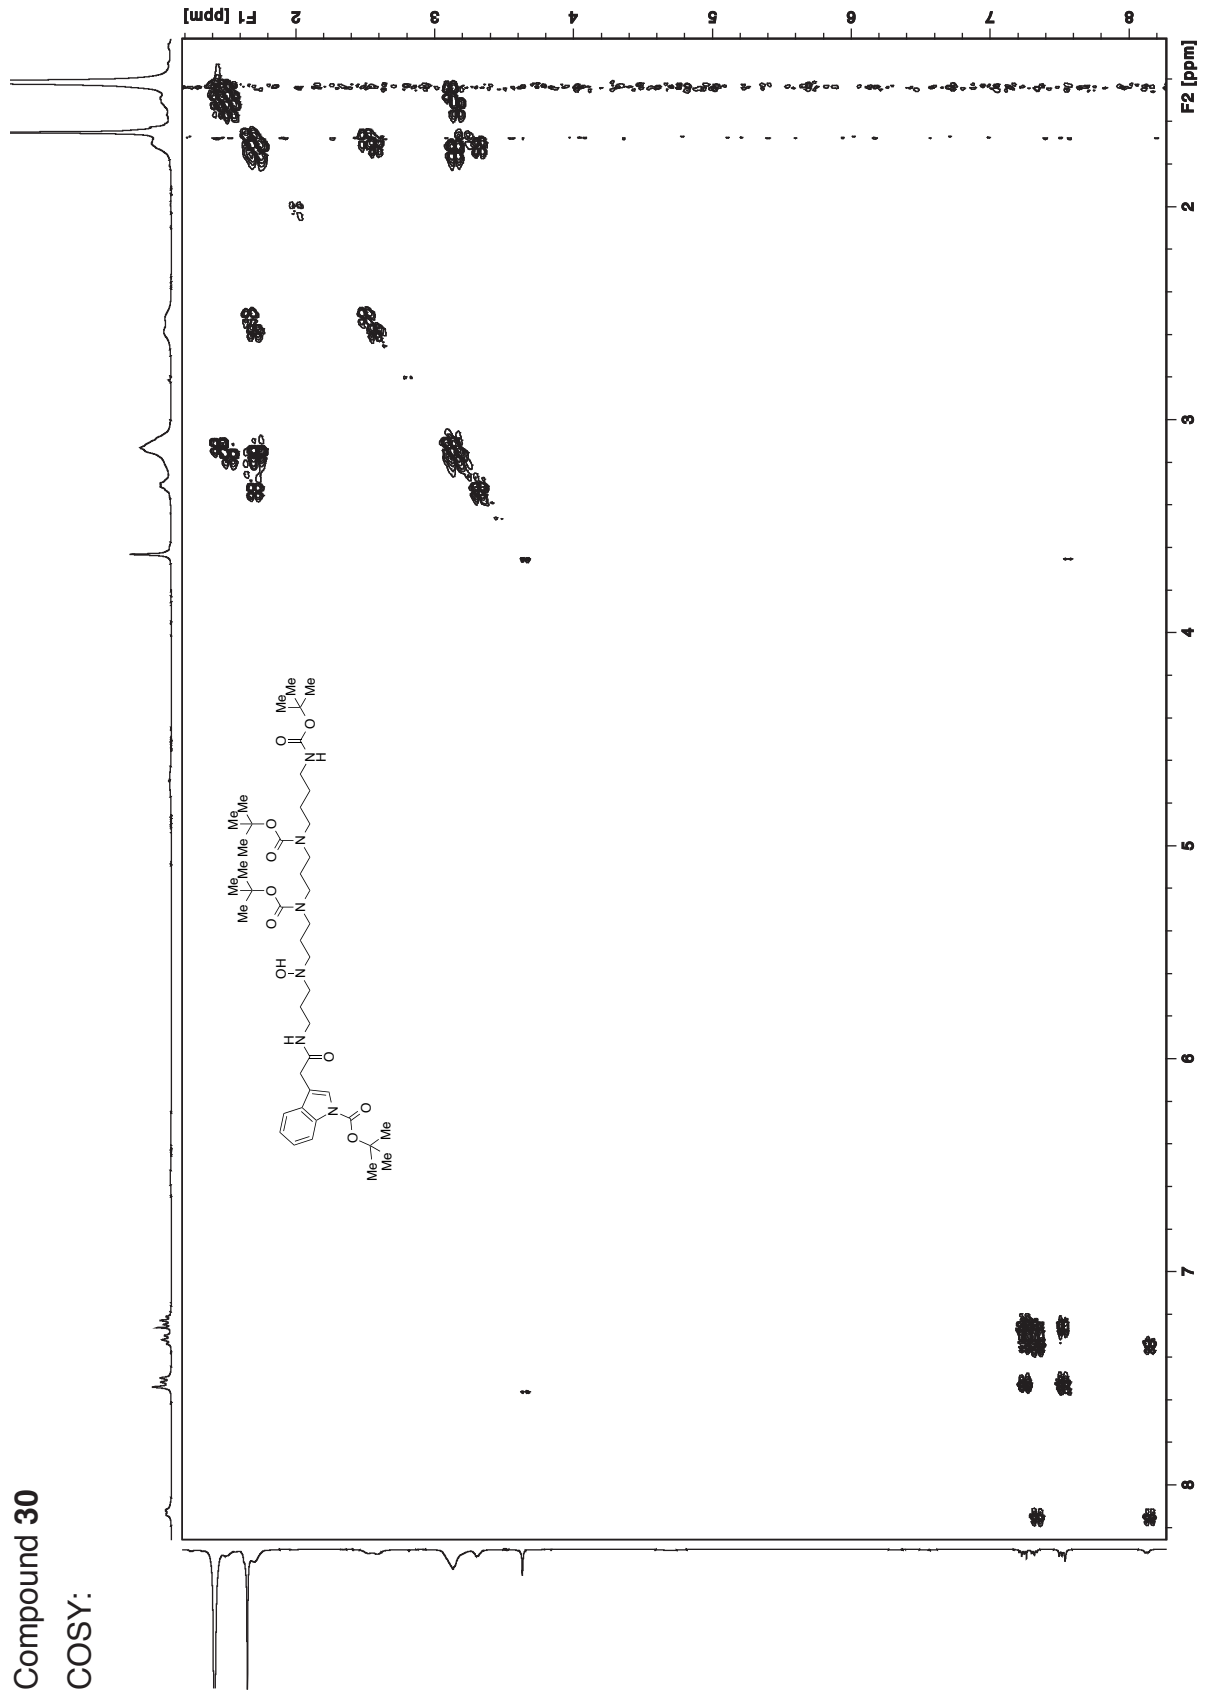

Compound 30

HSQC:

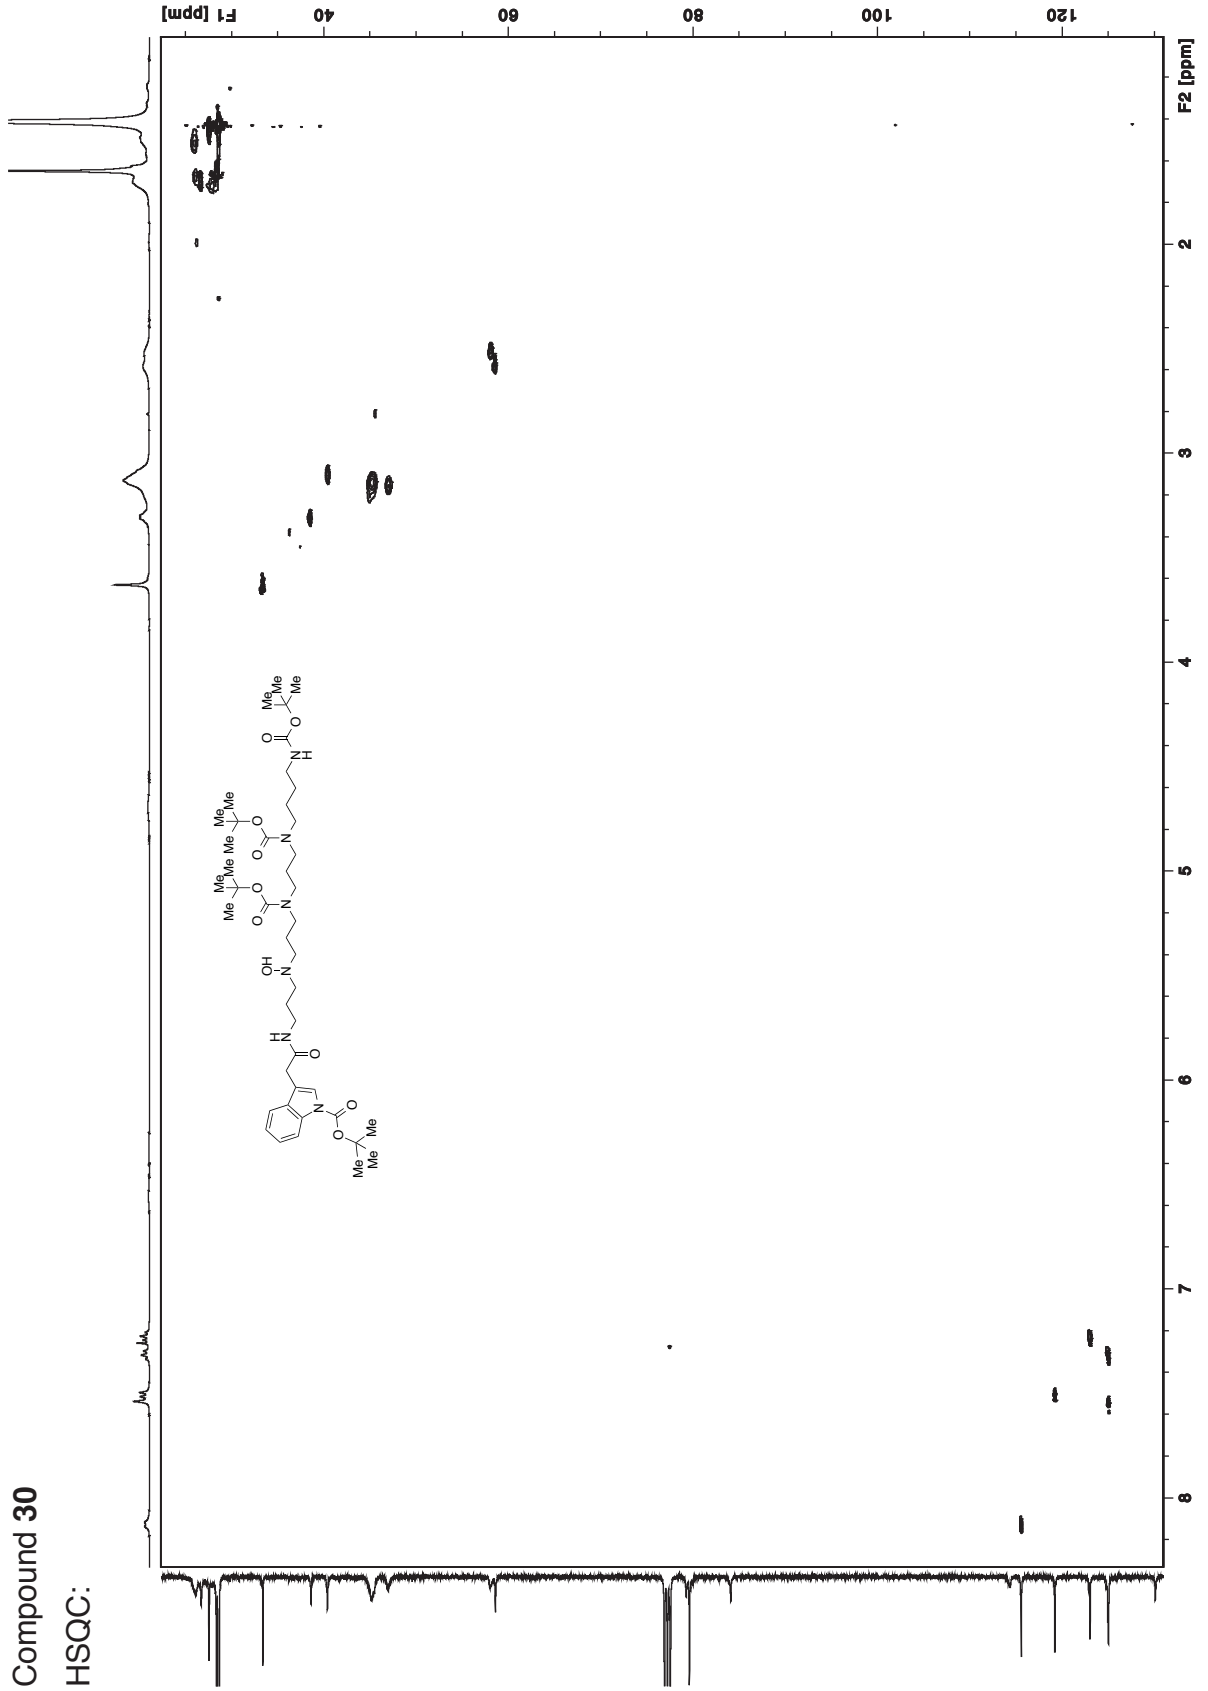

Compound **31**

<sup>1</sup>H – 400 MHz

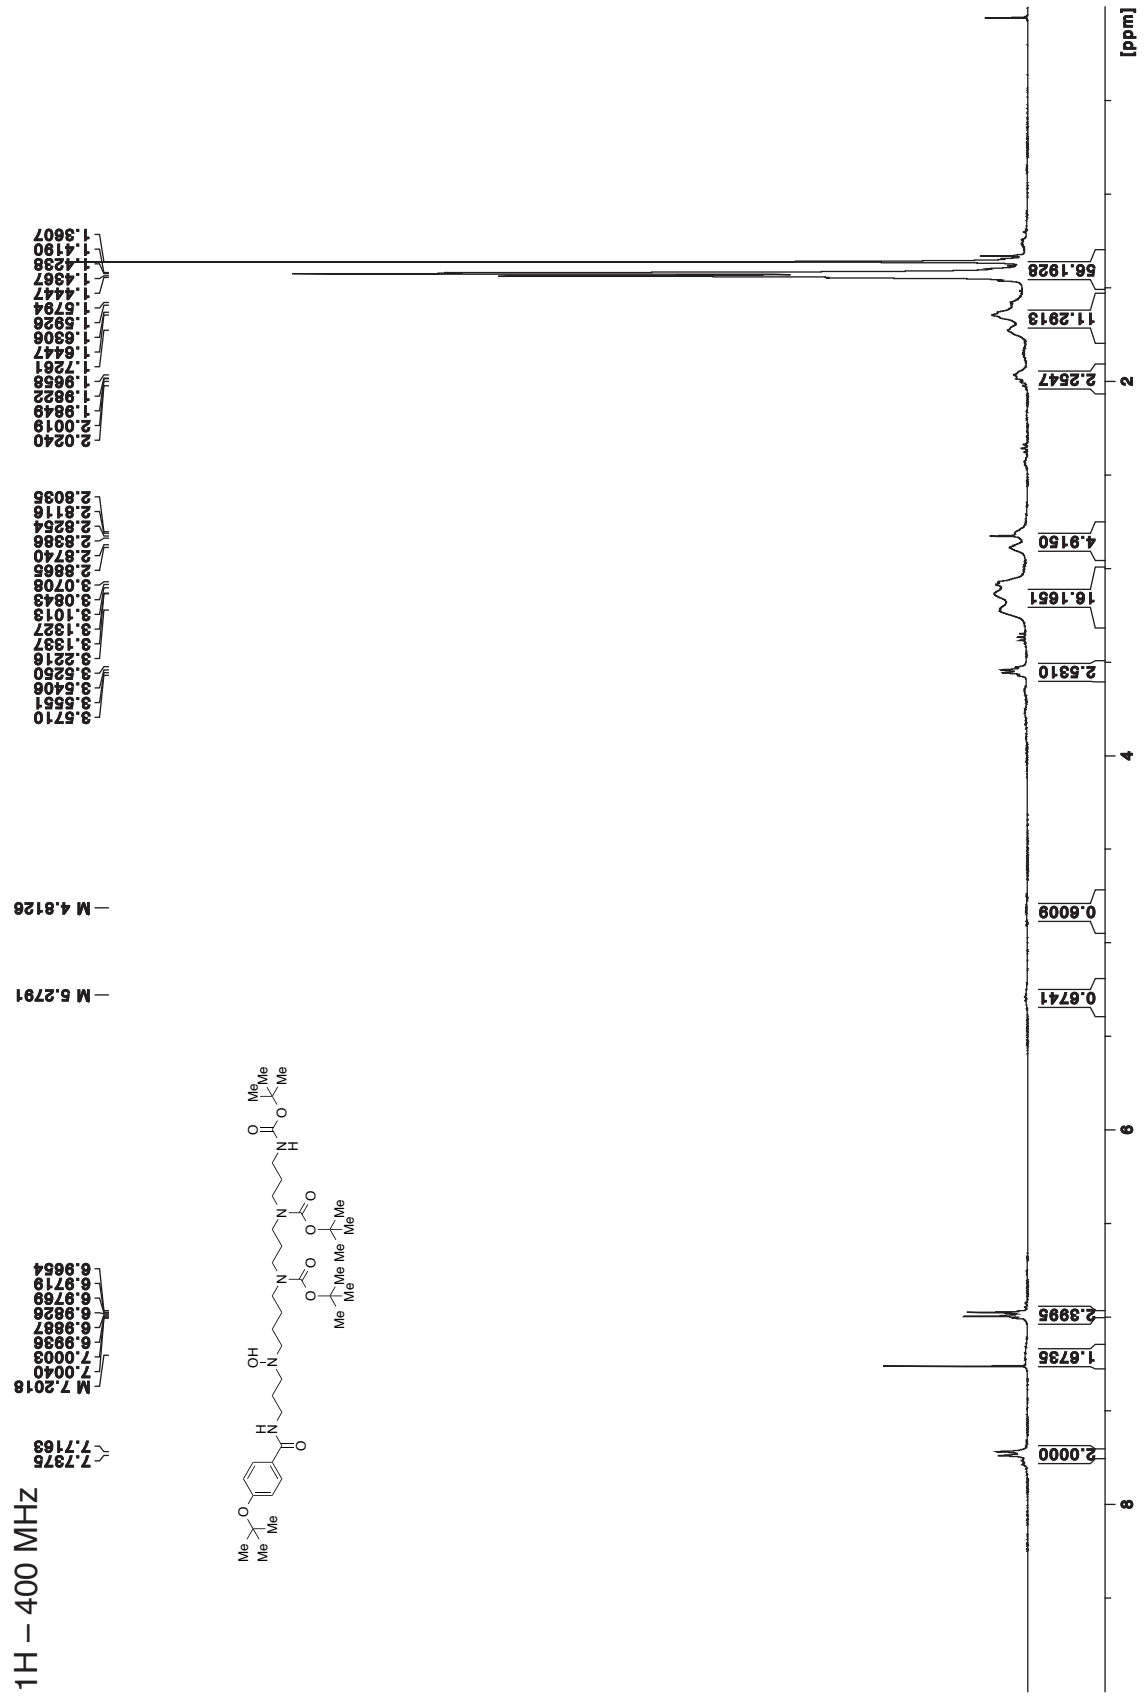

Compound 31  
13C — 100 MHz

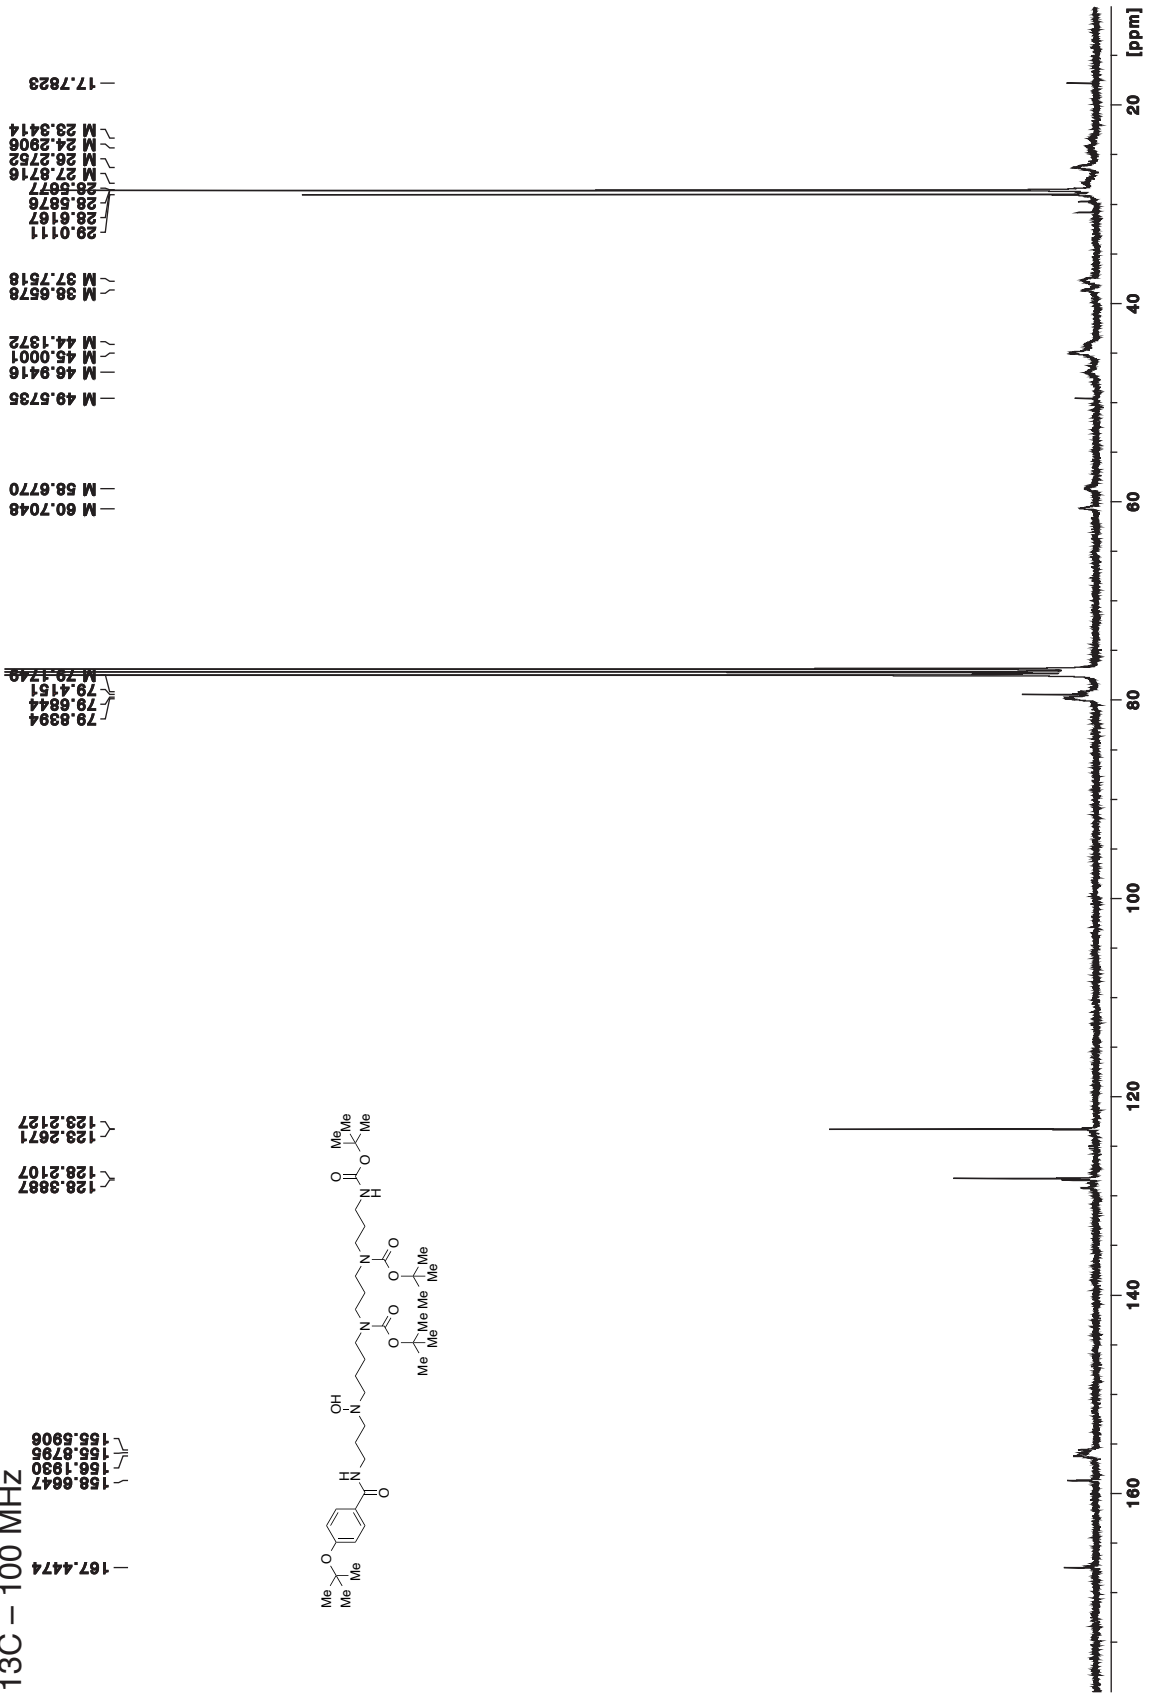

187.4474

158.6647

155.1930

155.8795

155.5908

129.9897

129.2127

129.2127

129.2127

129.2127

129.2127

129.2127

129.2127

129.2127

129.2127

129.2127

129.2127

129.2127

129.2127

129.2127

129.2127

129.2127

129.2127

129.2127

129.2127

129.2127

129.2127

129.2127

129.2127

129.2127

129.2127

129.2127

129.2127

129.2127

129.2127

129.2127

129.2127

129.2127

129.2127

129.2127

129.2127

129.2127

129.2127

129.2127

129.2127

129.2127

129.2127

129.2127

129.2127

17.7823

29.0111

28.6167

28.5876

28.5877

27.8719

26.2752

24.2906

23.3414

17.7823

17.7823

17.7823

17.7823

17.7823

17.7823

17.7823

17.7823

17.7823

17.7823

17.7823

17.7823

17.7823

17.7823

17.7823

17.7823

17.7823

17.7823

17.7823

17.7823

17.7823

17.7823

17.7823

17.7823

17.7823

17.7823

17.7823

17.7823

17.7823

17.7823

17.7823

17.7823

17.7823

17.7823

17.7823

17.7823

17.7823

17.7823

17.7823

17.7823

17.7823

17.7823

17.7823

17.7823

17.7823

17.7823

17.7823

17.7823

17.7823

17.7823

17.7823

17.7823



Compound **31**

COSY:

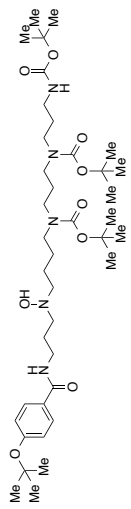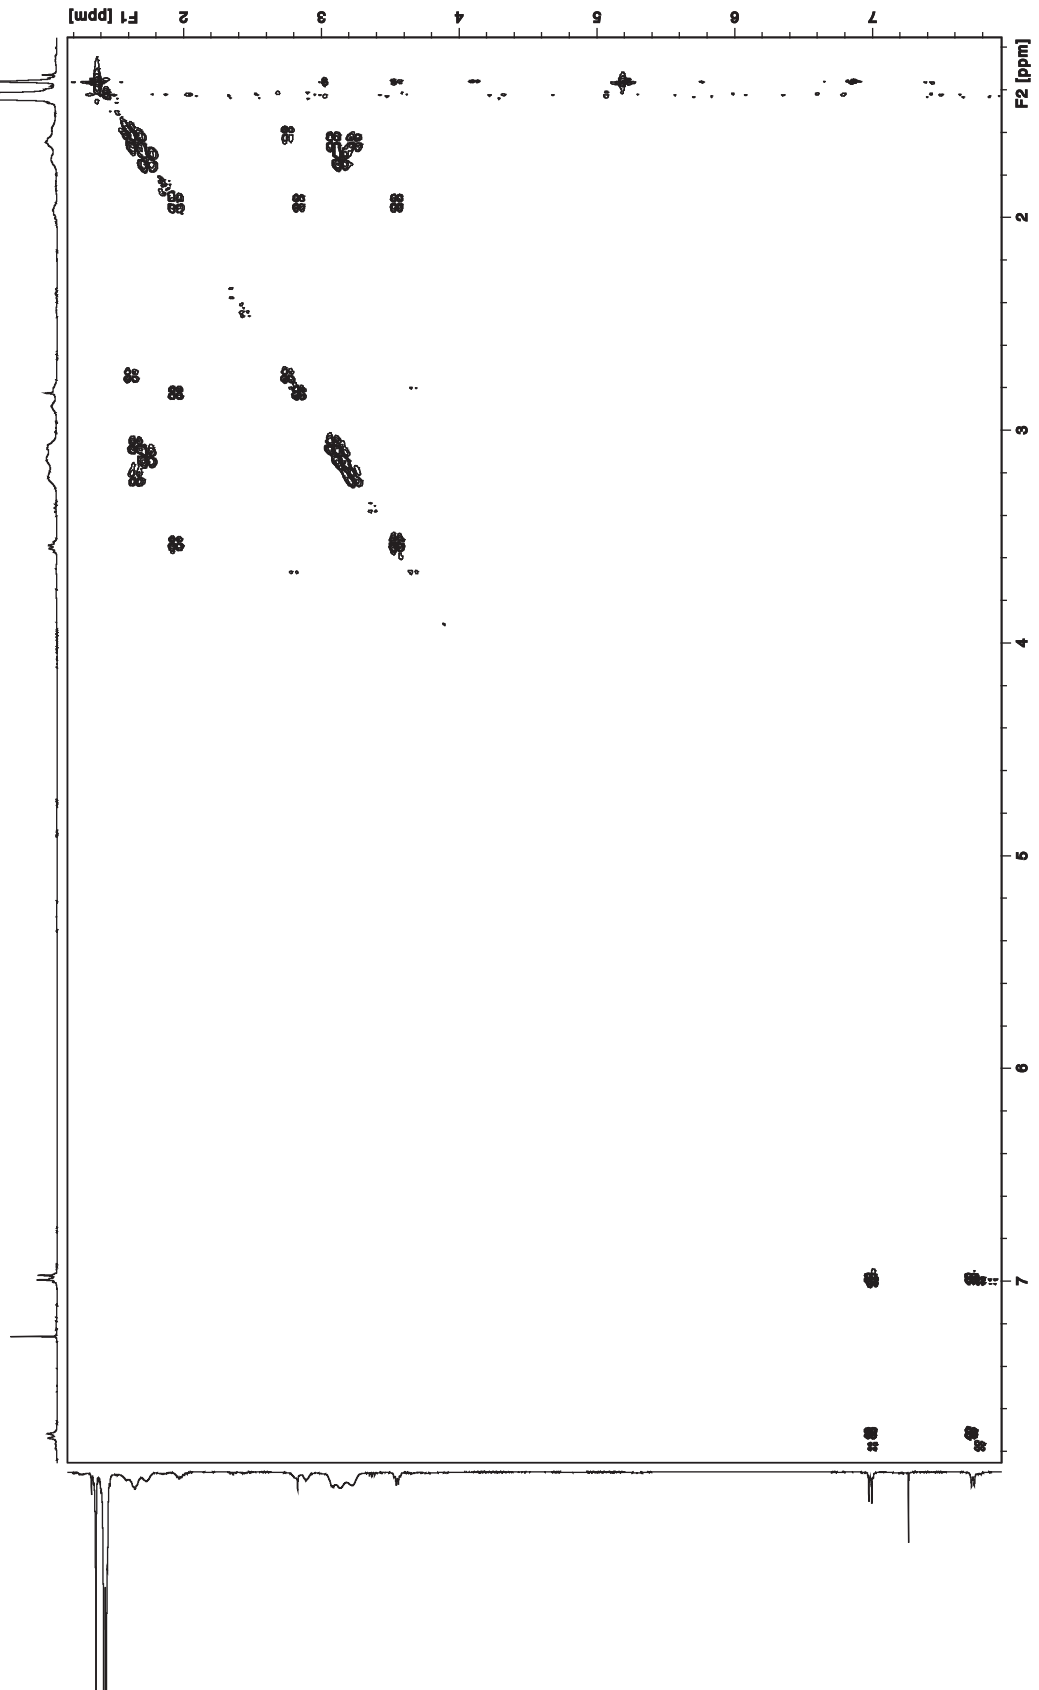

Compound 31

HSQC:

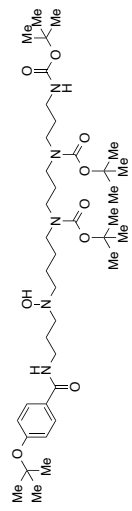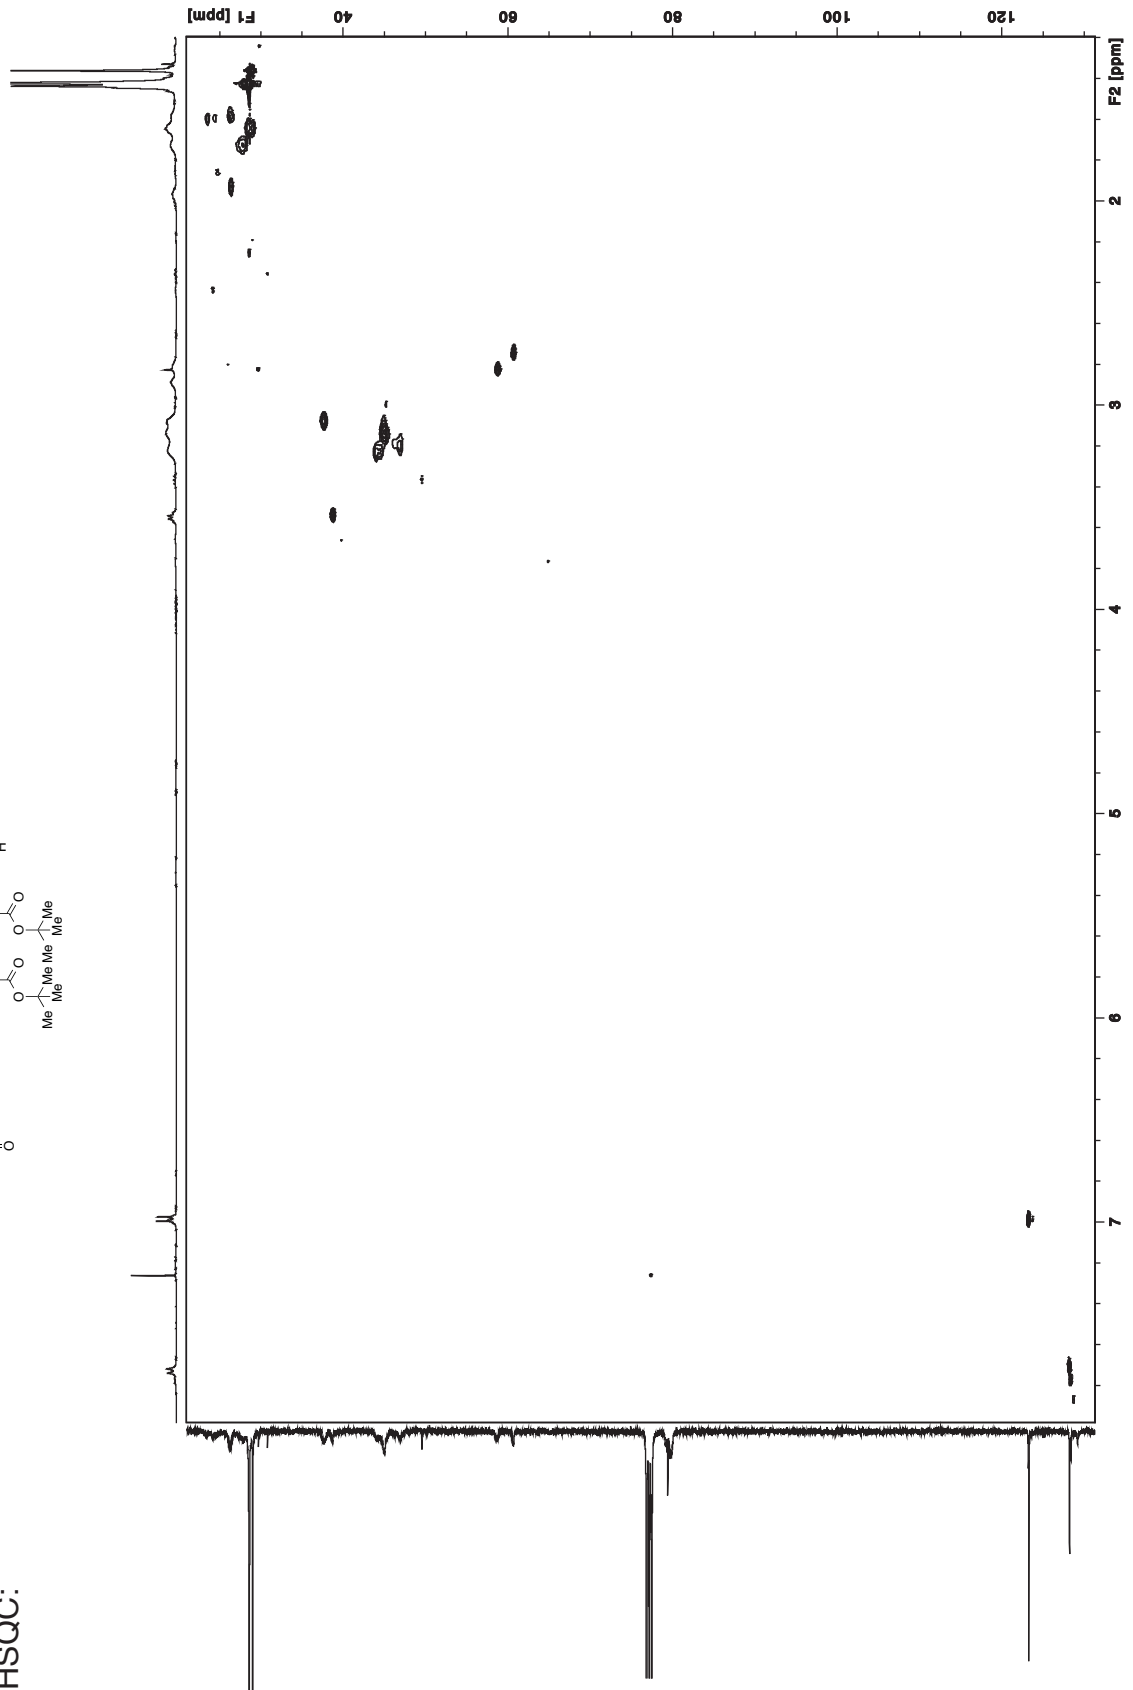

Compound 40

<sup>1</sup>H – 500 MHz  
315K

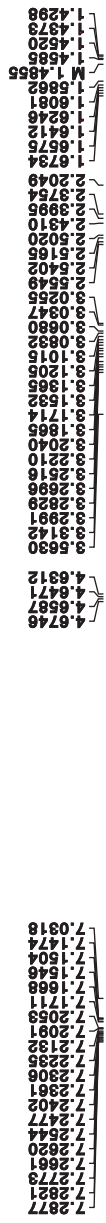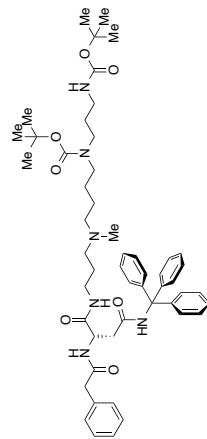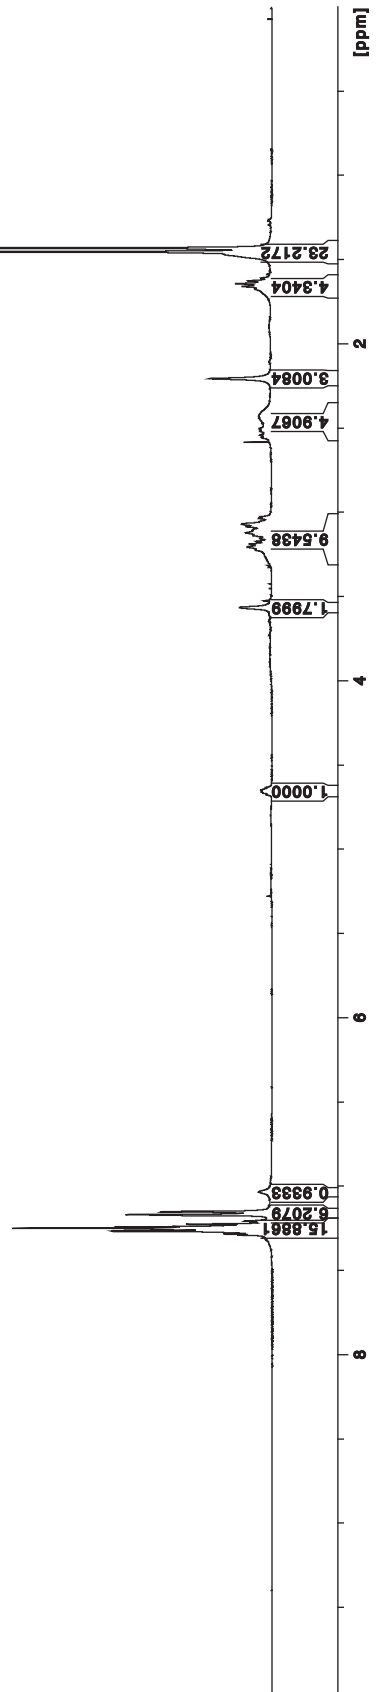

Compound 40

13C – 125 MHz  
315K

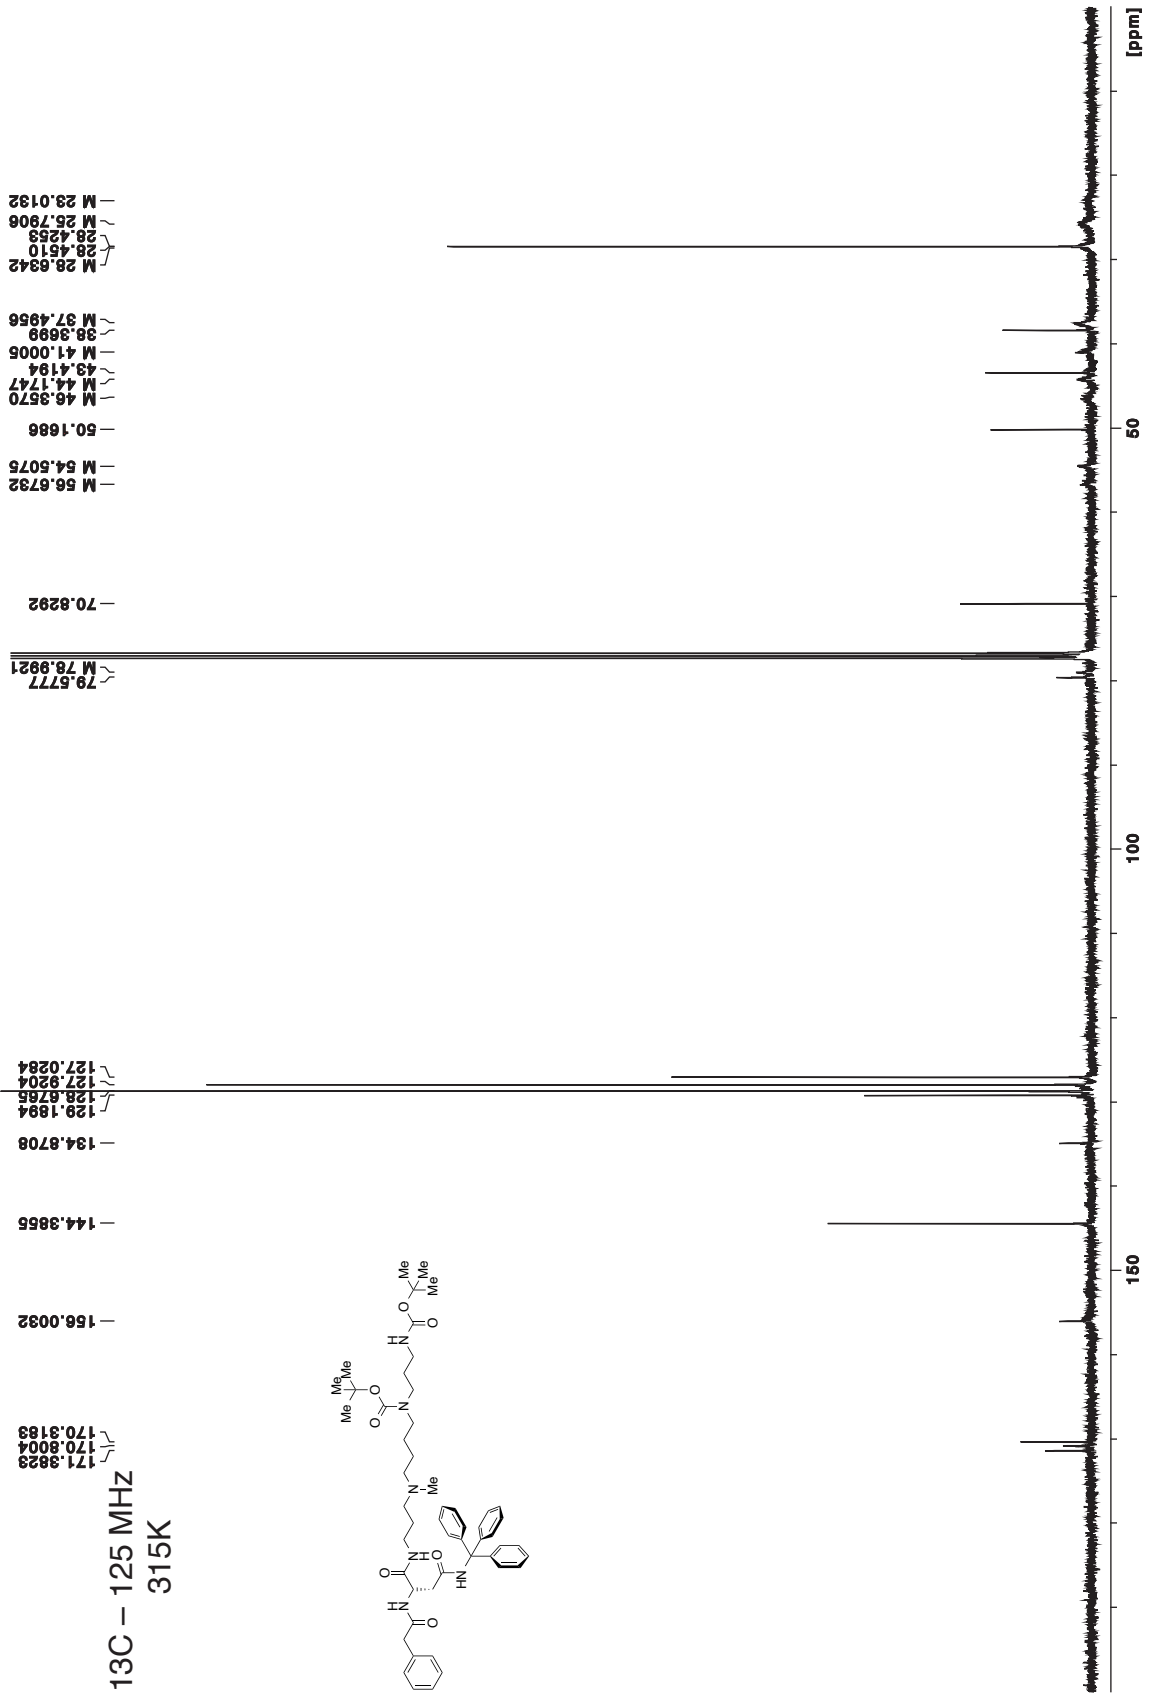

Compound 40

COSY:

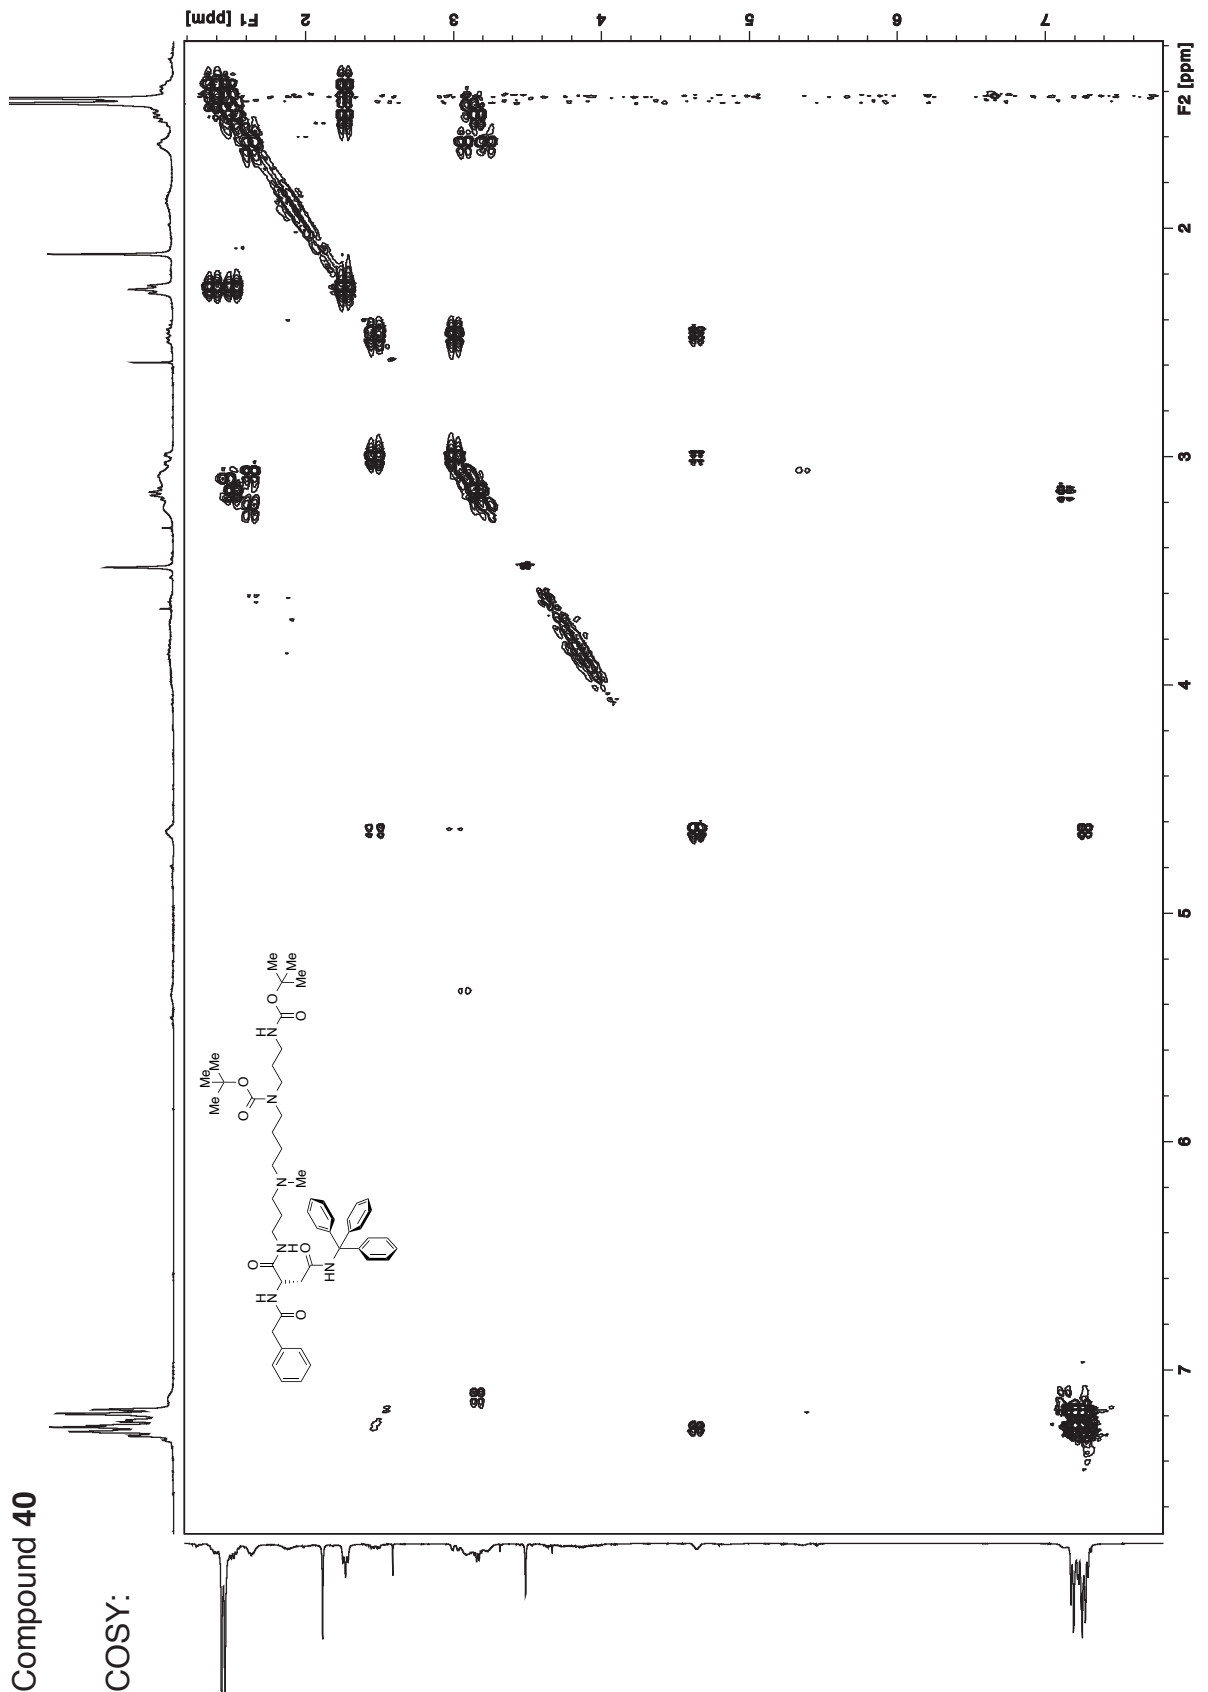

Compound 40

HSQC:

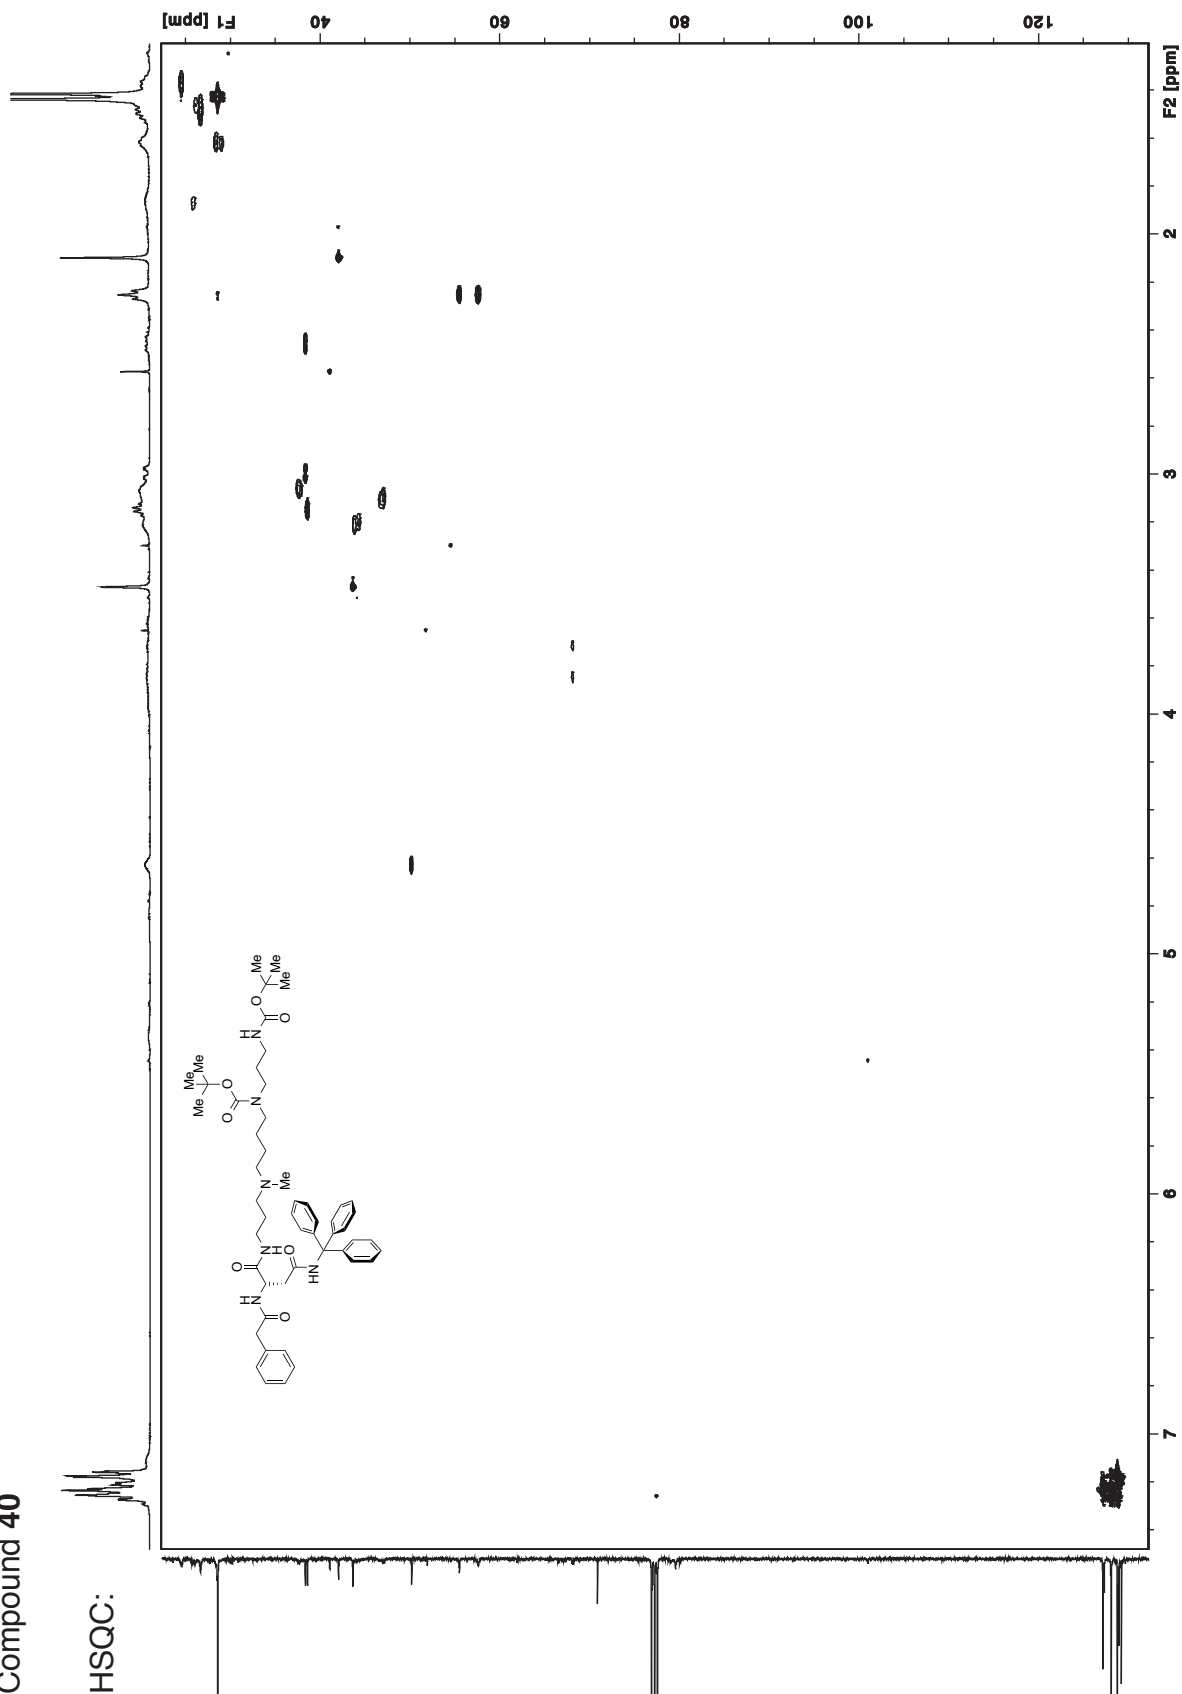

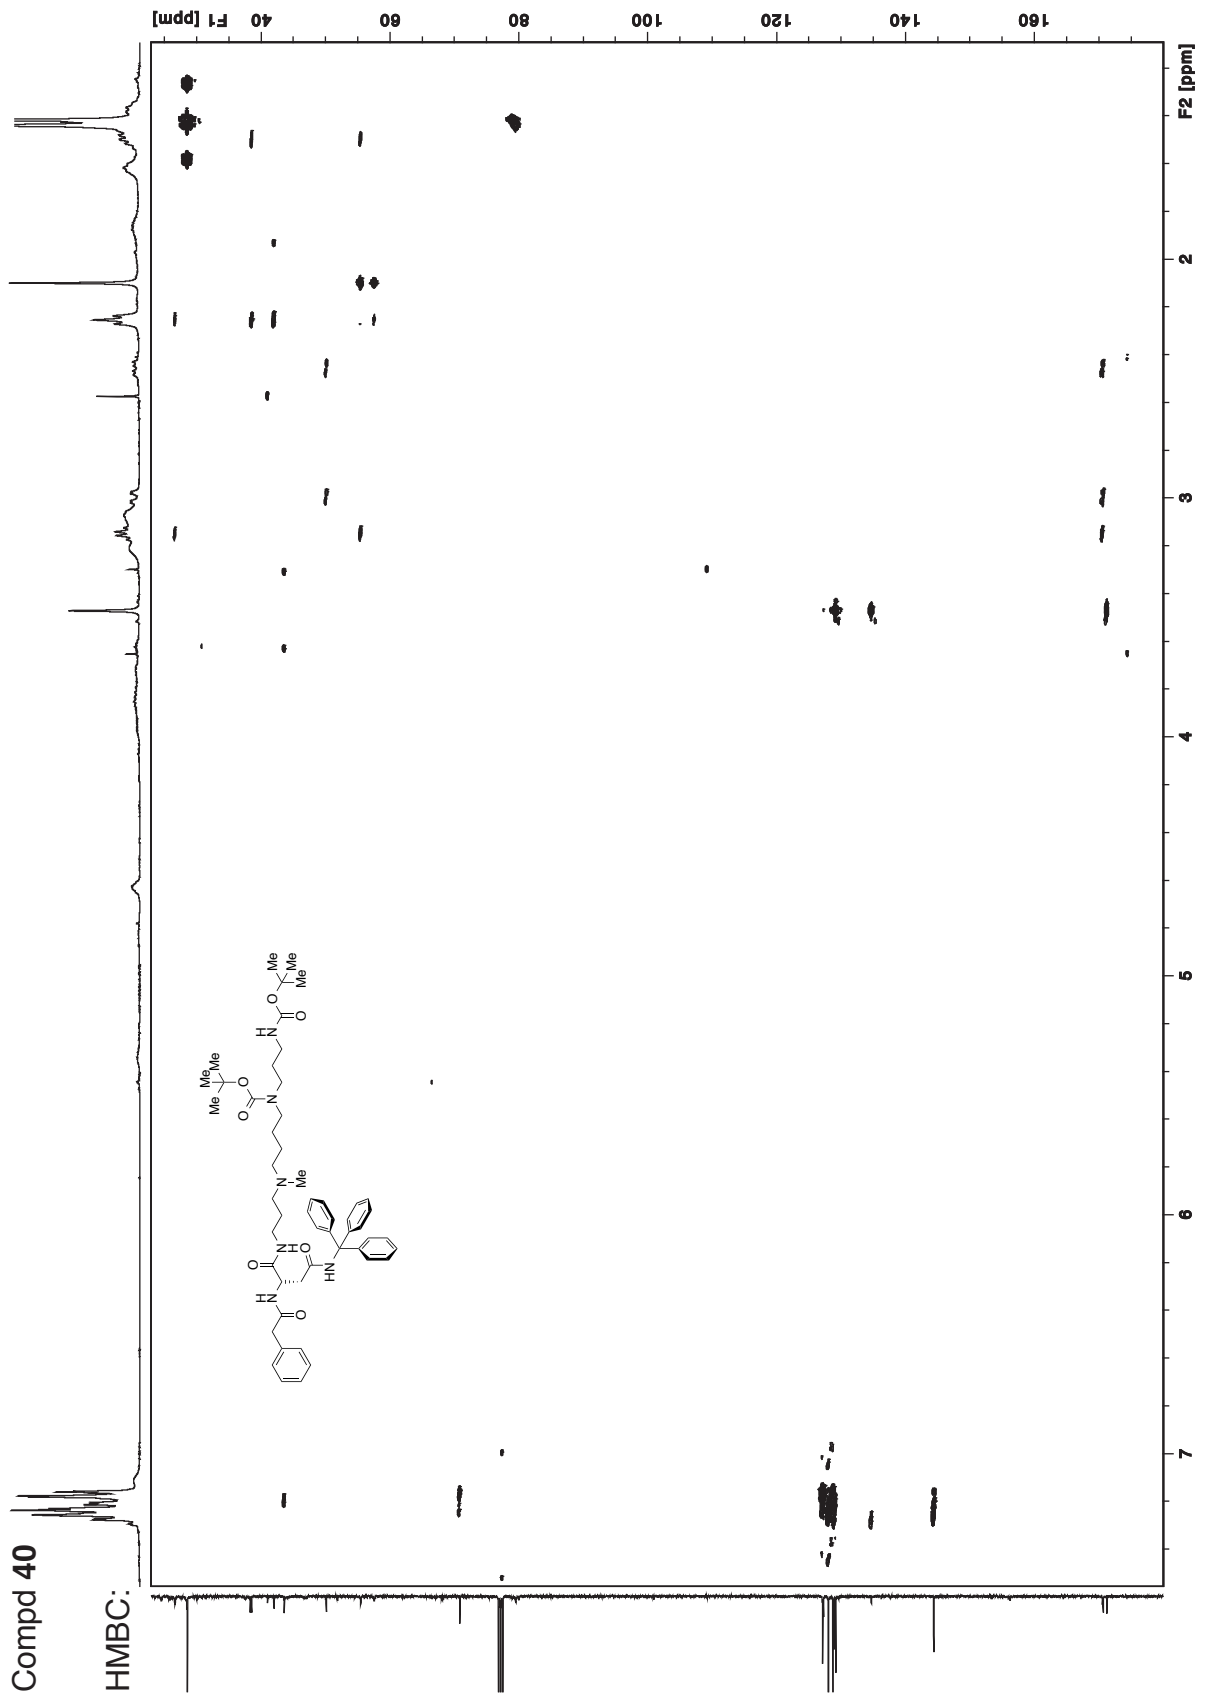

# Compound 41

<sup>1</sup>H – 500 MHz  
313K

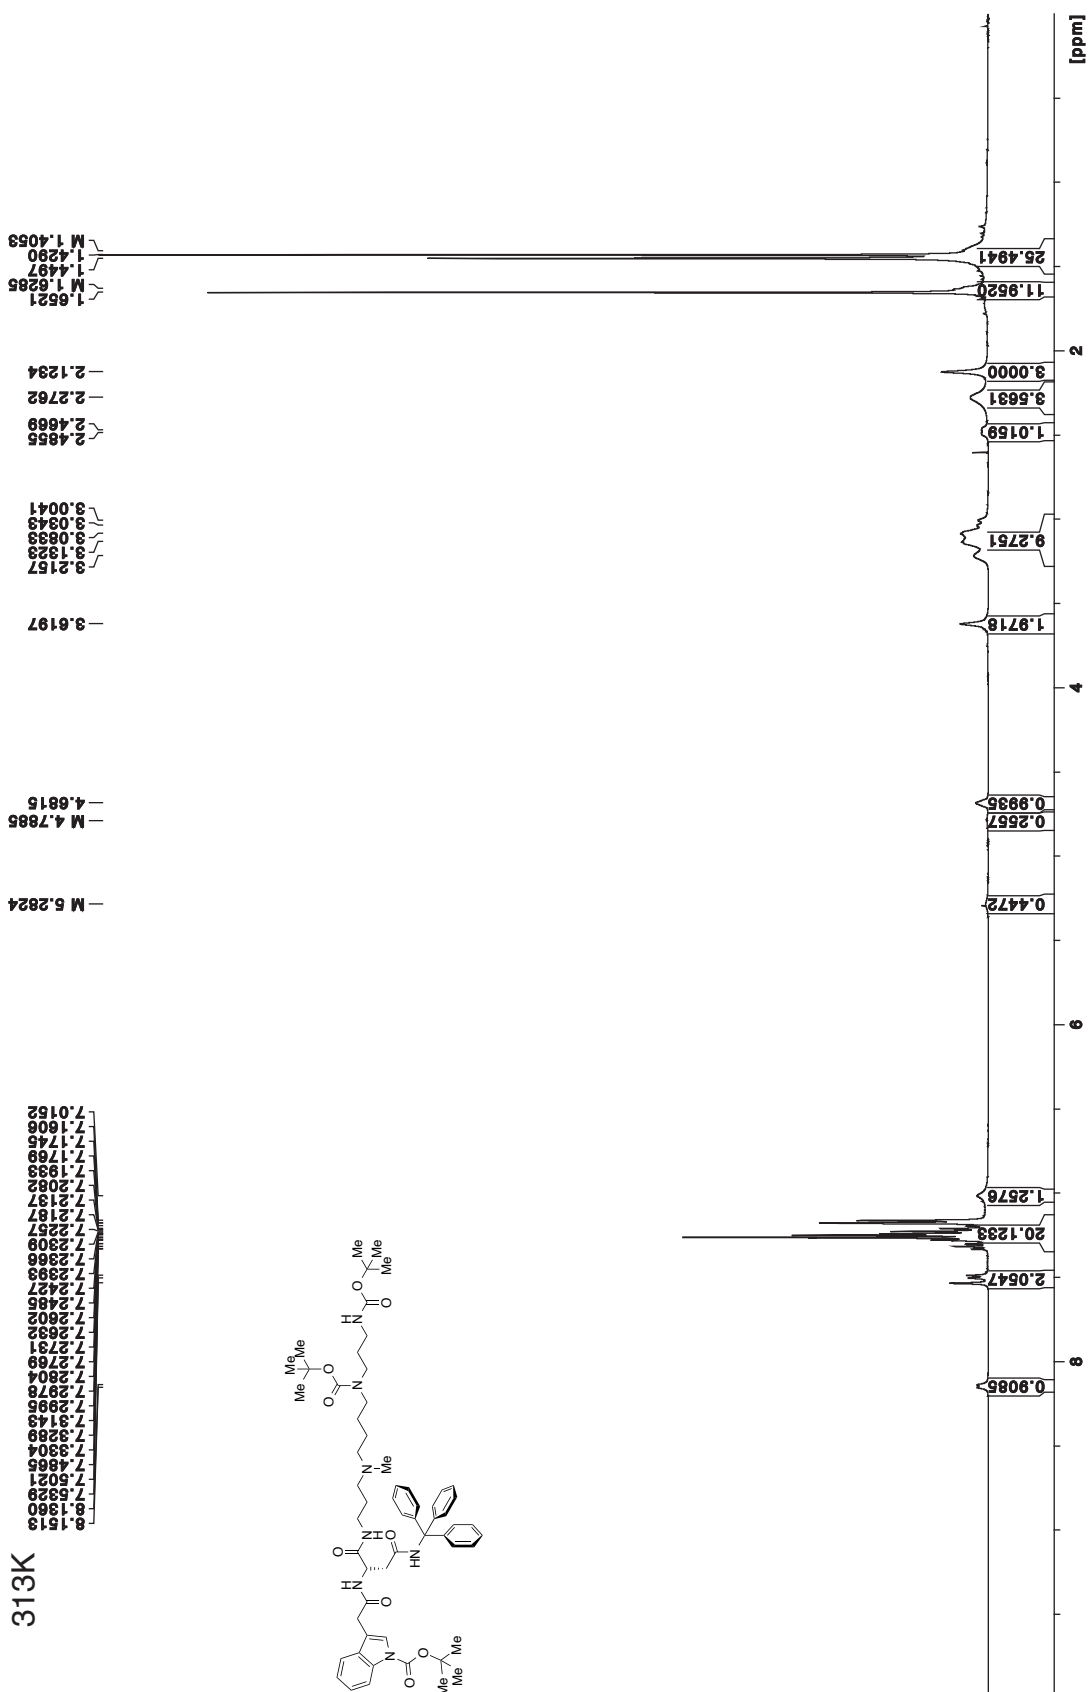



Compound 41  
 13C -125 MHz  
 313K

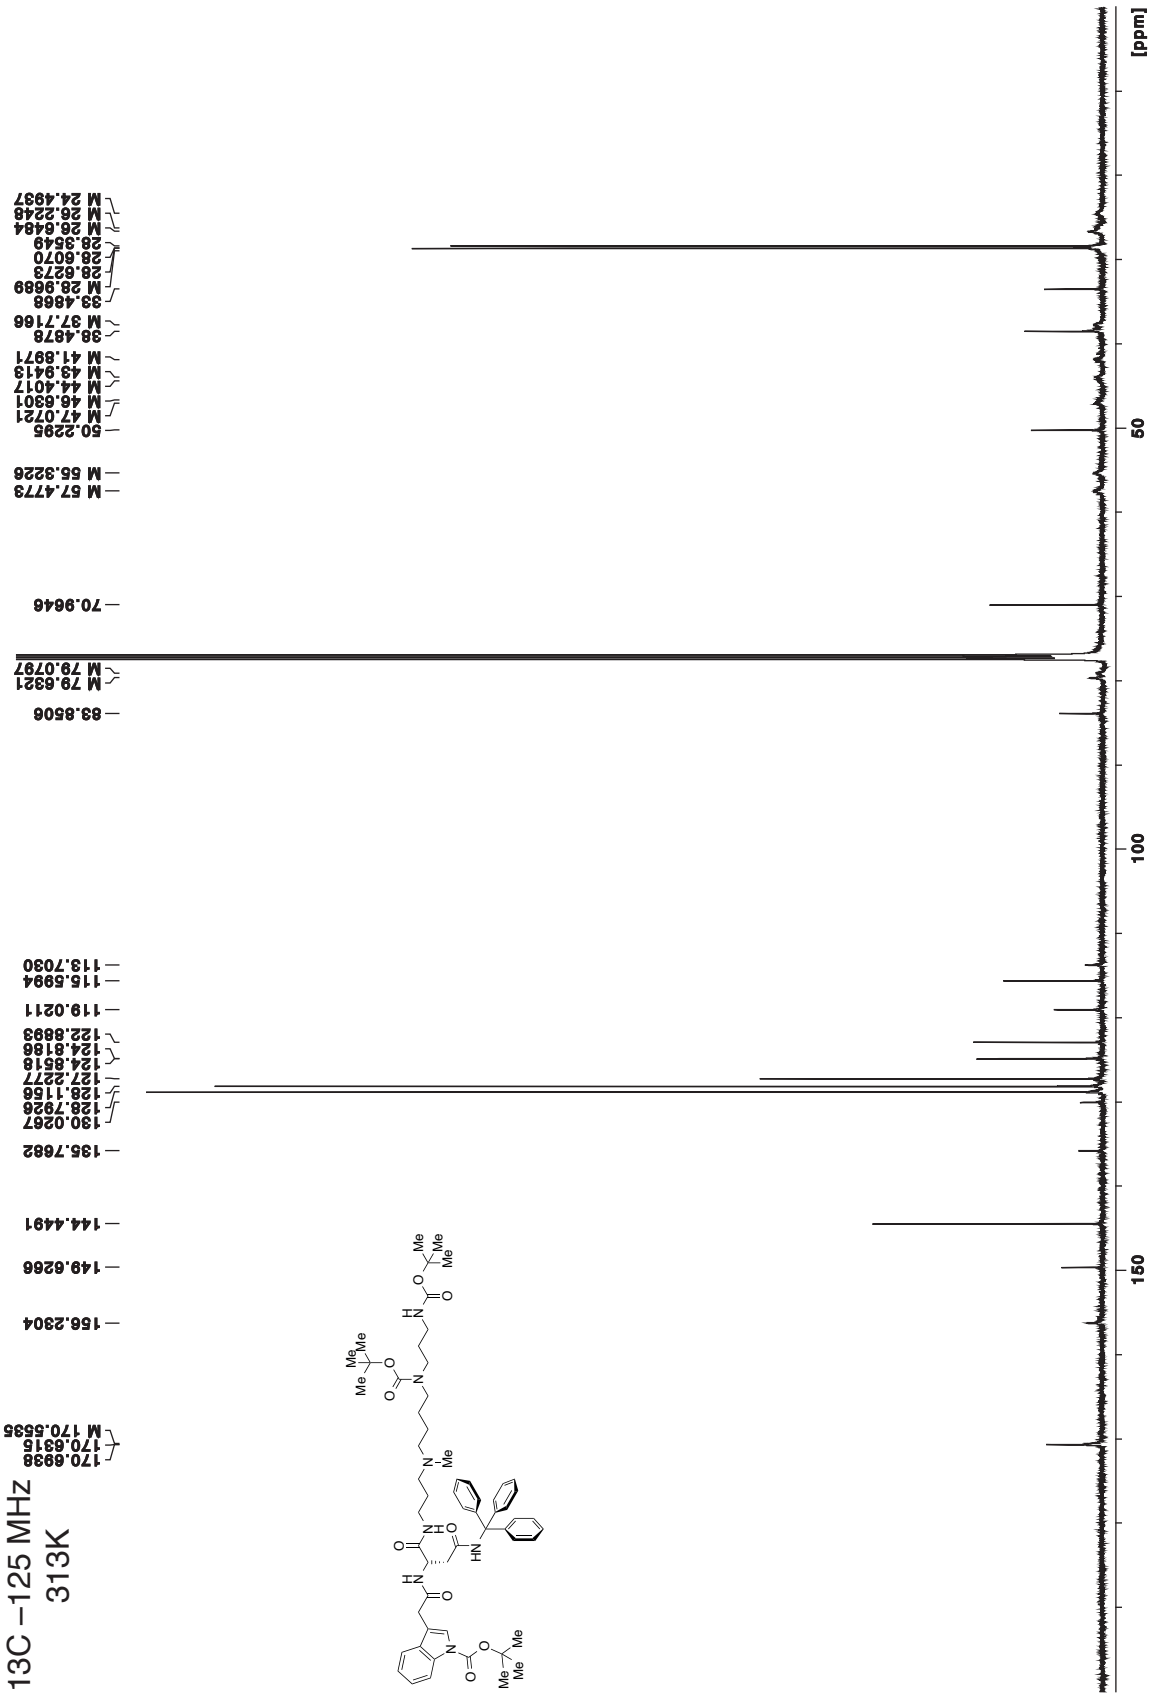

Compound 41

COSY:

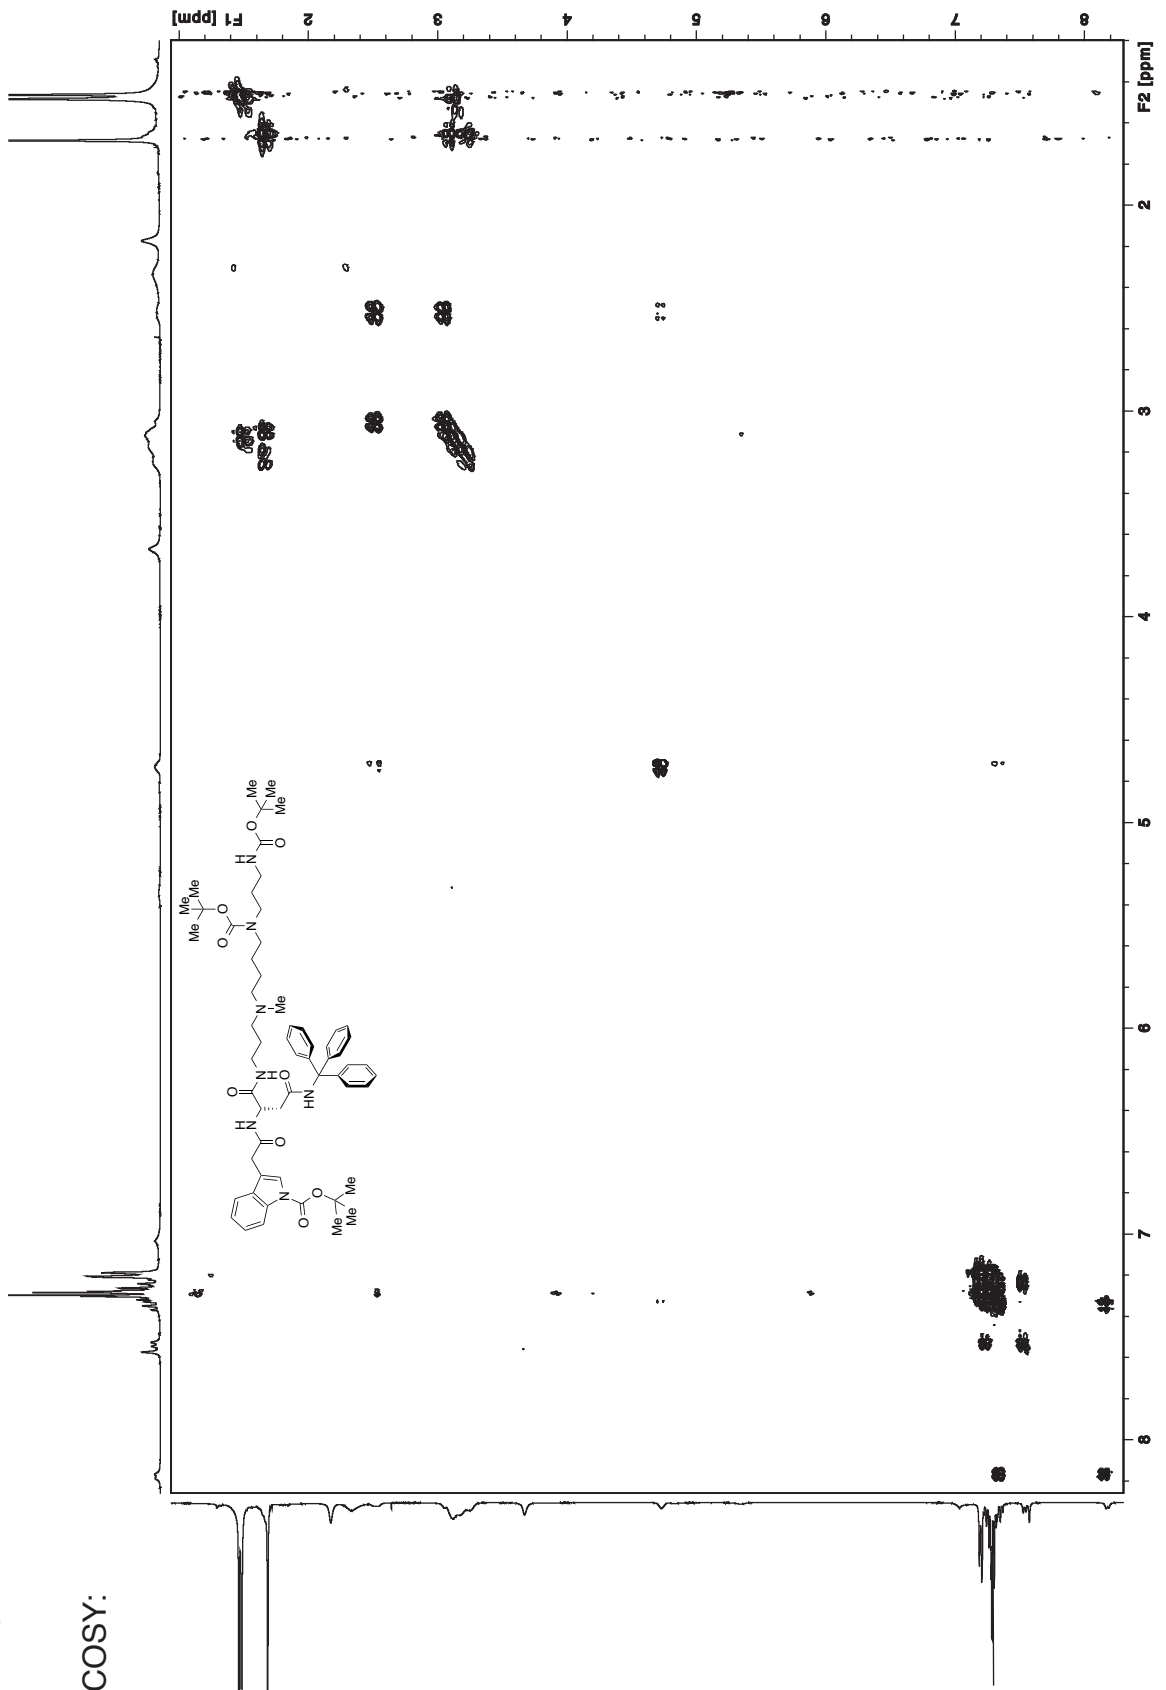

Compound 41

HSQC:

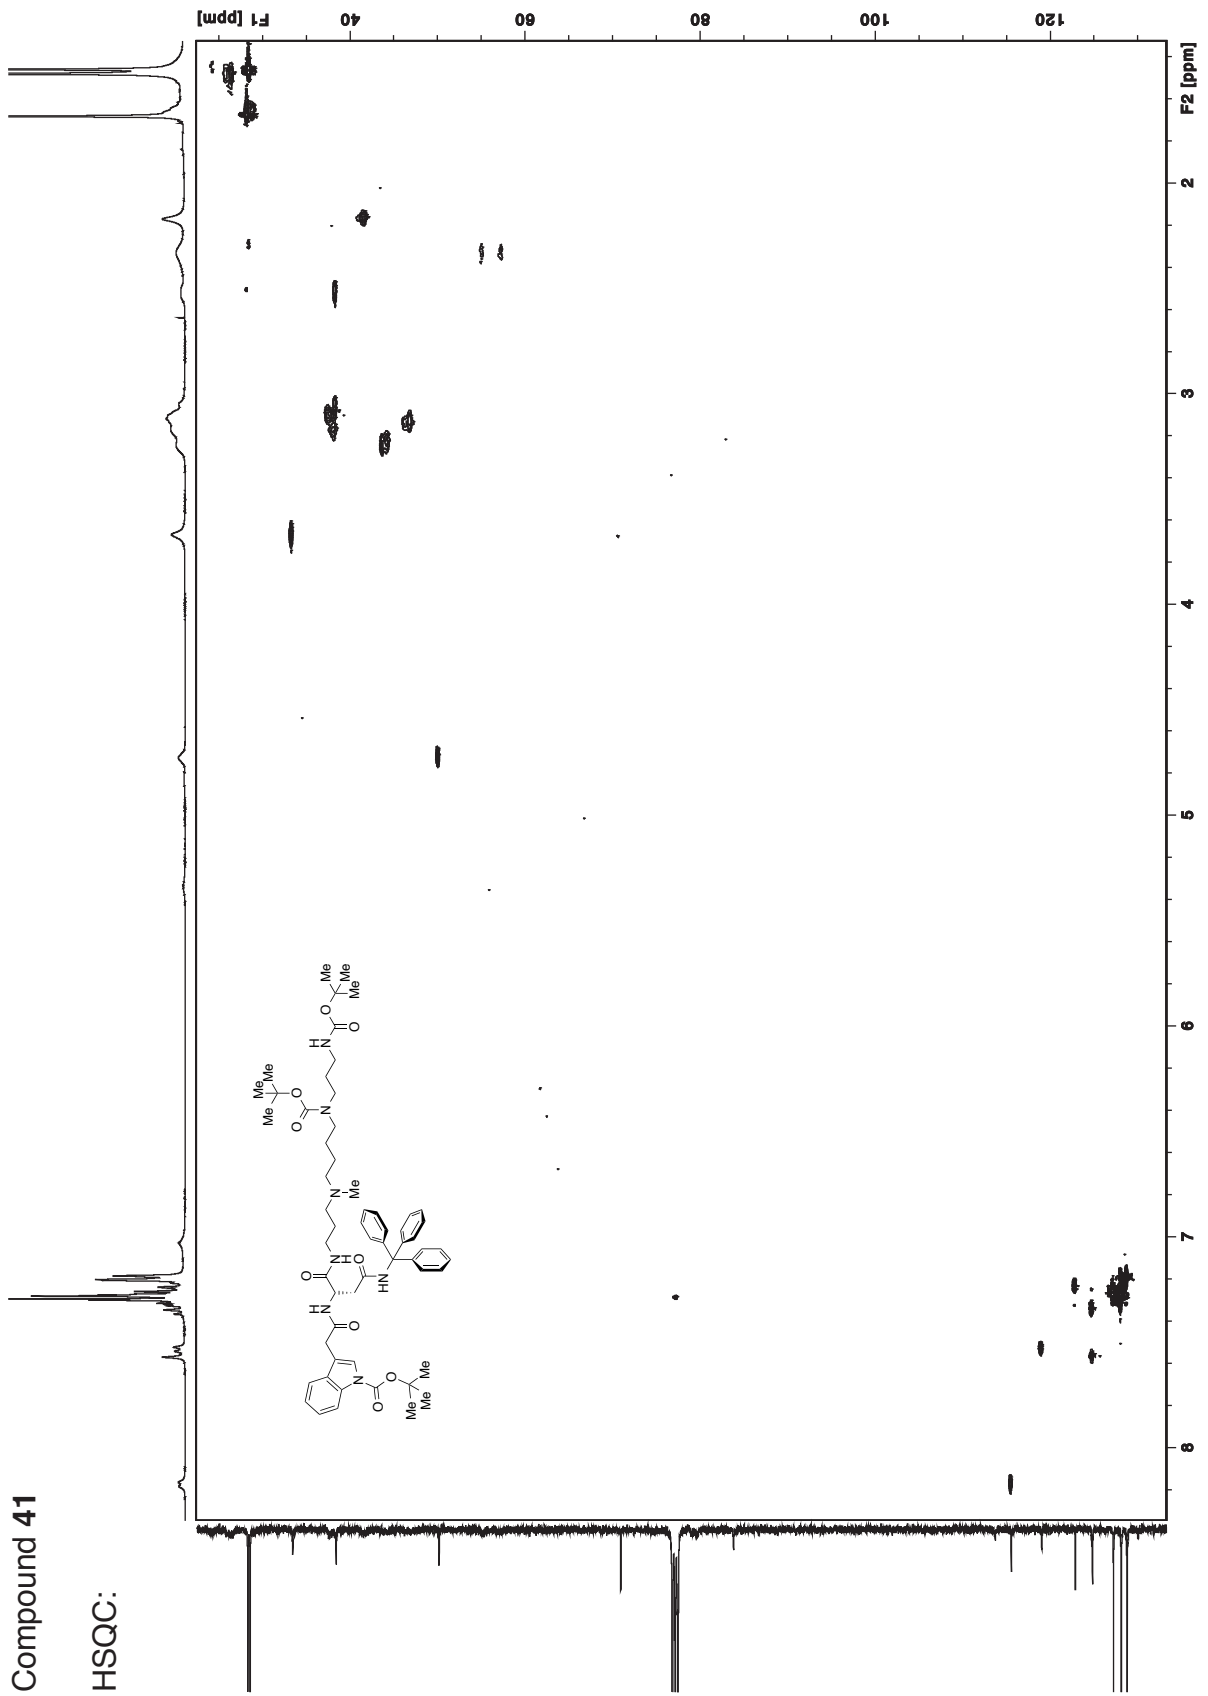

Compound 41

HMBC:

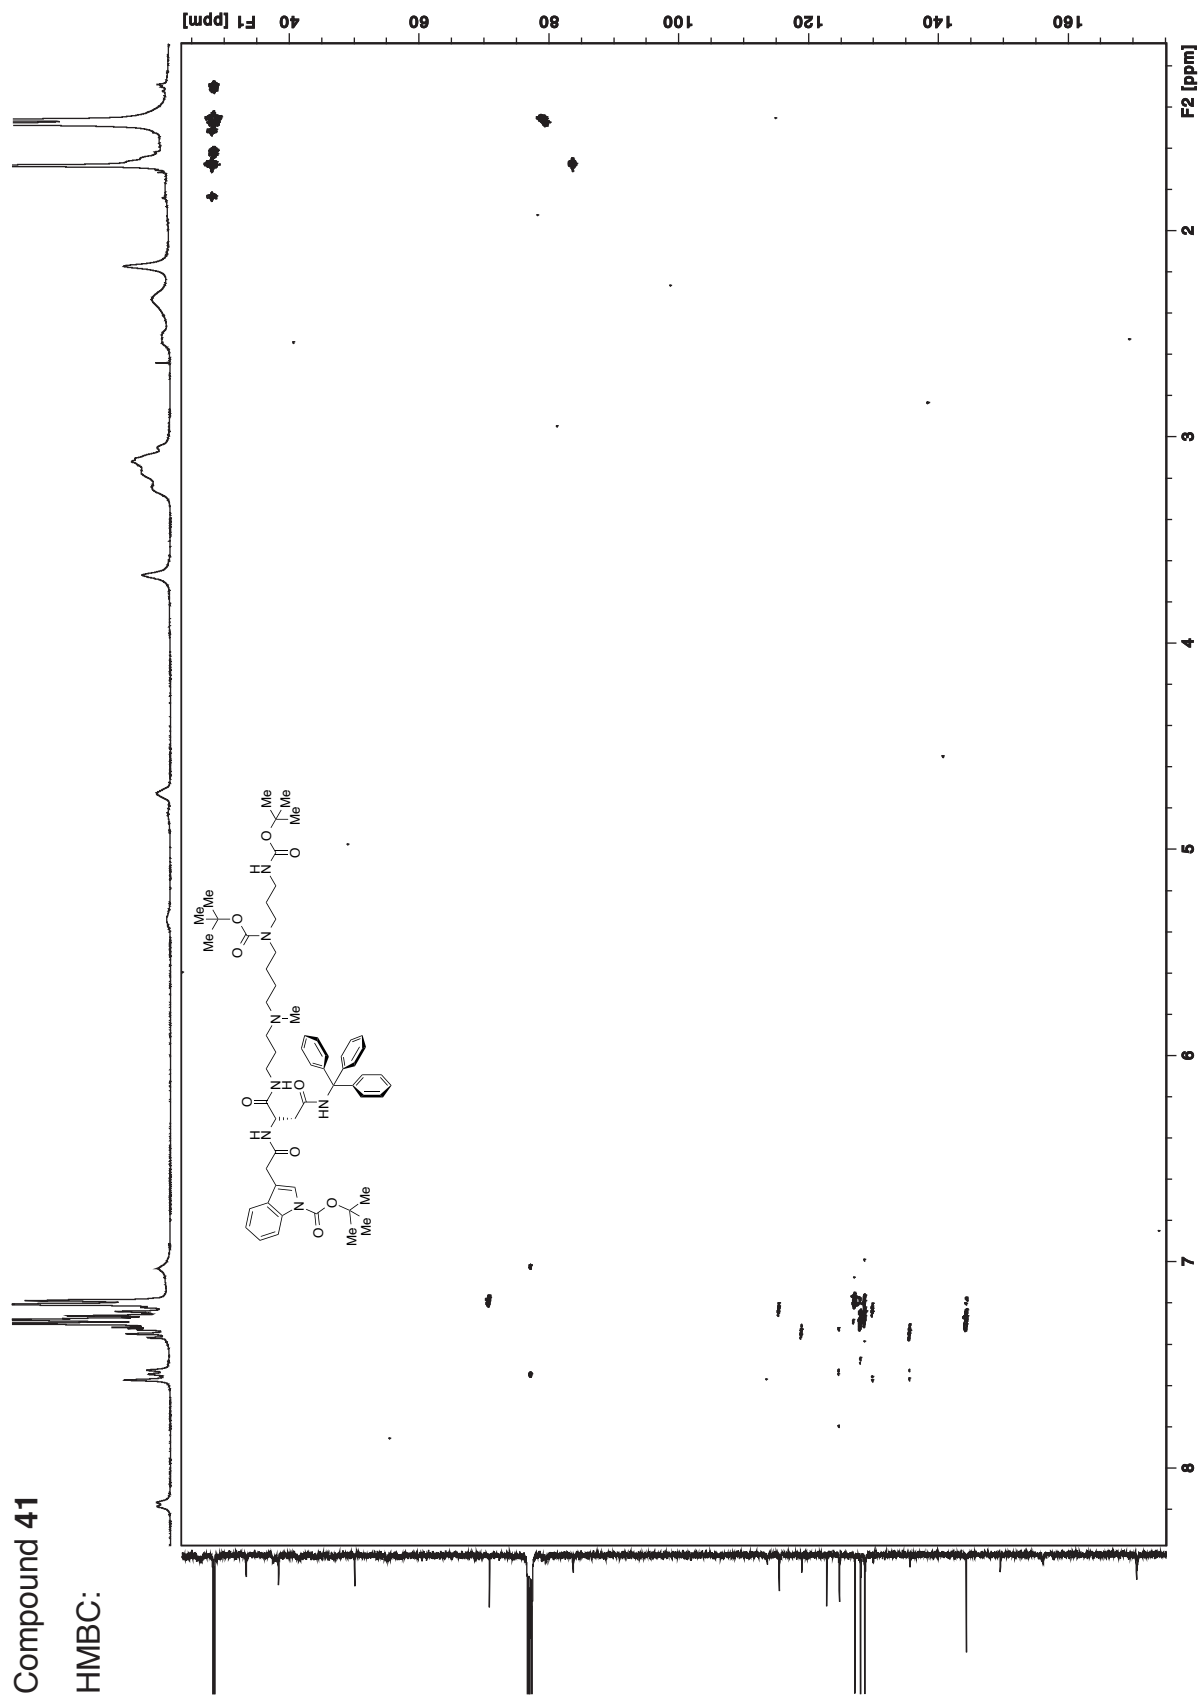

Comparison of the chromatographic behavior of the toxins of *L. folium* and the synthetic toxins **LF448A** and **LF487A**.

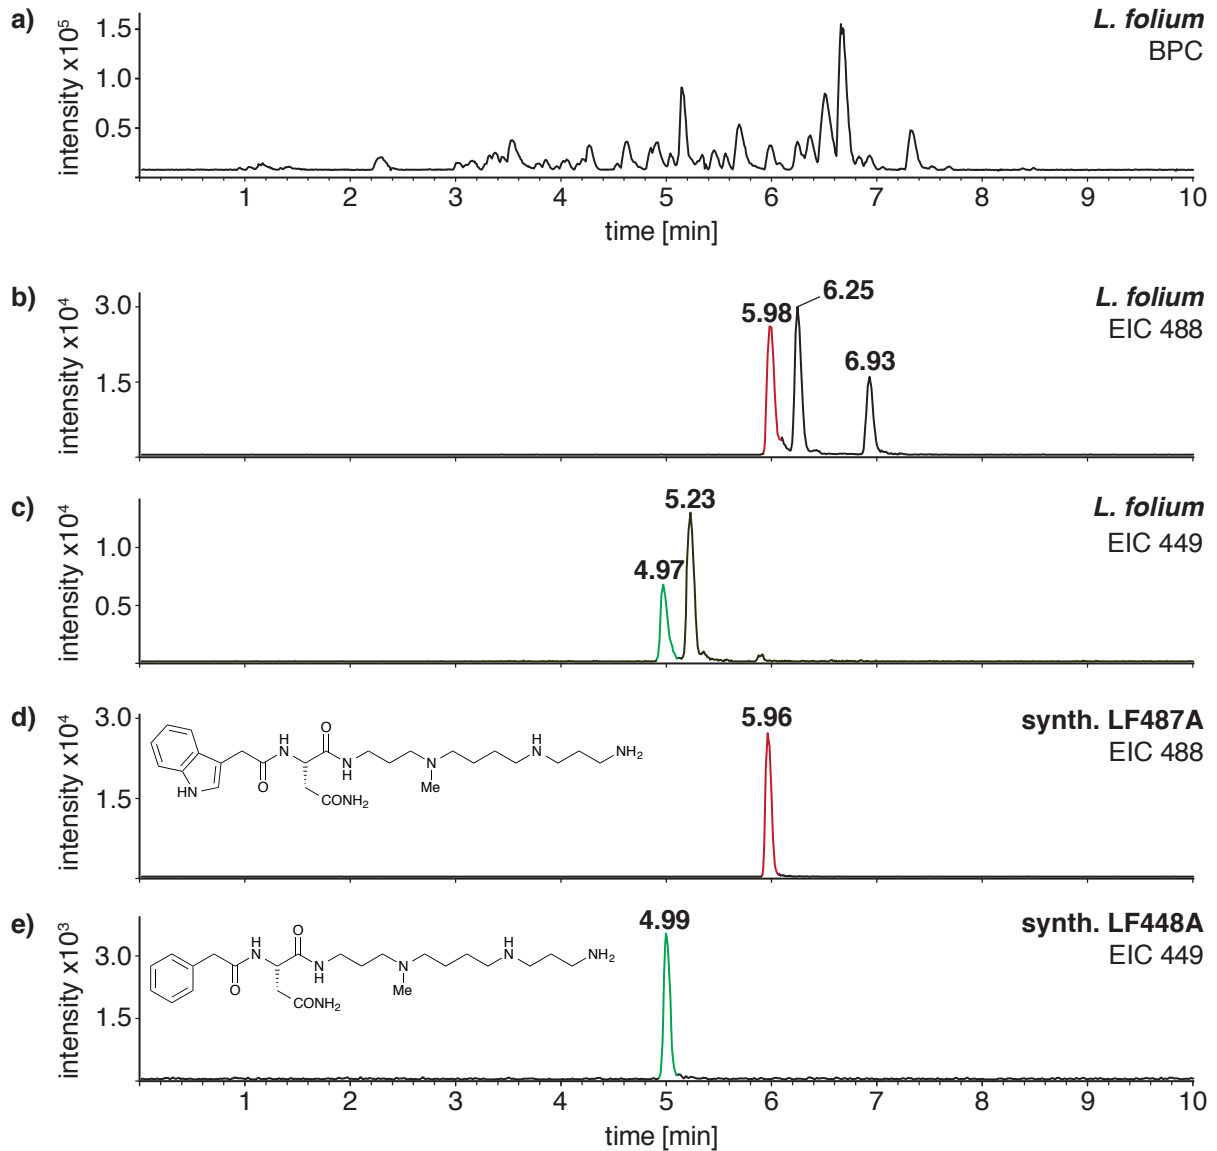

Comparison of the MS/MS of the natural toxins of *L. folium* and the synthetic samples.

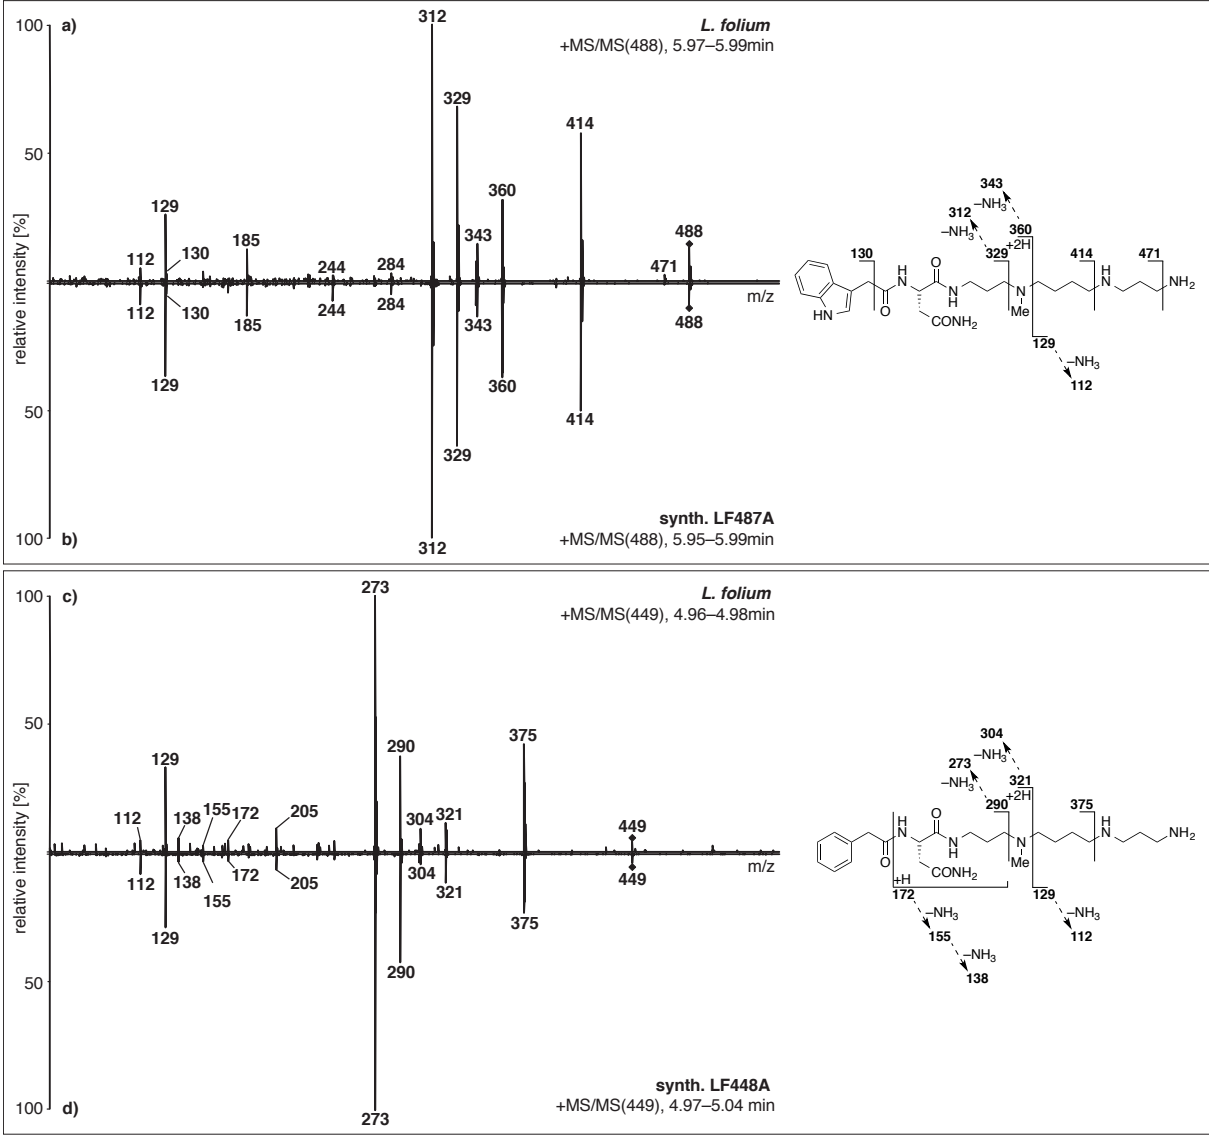

Supplement: c5ob00108k2.pdf [file c5ob00108k2.pdf]
